# Supplementary material for: An expanded high throughput RT-PCR assay to rapidly identify all known SARS-CoV-2 variants of concern using melting temperature coding
Source: bioRxiv or medRxiv preprint supplement (doi:10.1101/2022.01.18.22269424), 2022-01-21
Supplement: Supplementary file [file media-1.pdf]

We gratefully acknowledge the following Authors from the Originating laboratories responsible for obtaining the specimens, as well as the Submitting laboratories where the genome data were generated and shared via GISAID, on which this research is based.

All Submitters of data may be contacted directly via [www.gisaid.org](http://www.gisaid.org)

Authors are sorted alphabetically.

| Accession ID                                                                                                                                                                                                                                                                                                                                                                                                                                             | Originating Laboratory                                                                              | Submitting Laboratory                                                                                                                        | Authors                                                                                                                                                                                                                                                                                                                                                                                                                                                                                            |
|----------------------------------------------------------------------------------------------------------------------------------------------------------------------------------------------------------------------------------------------------------------------------------------------------------------------------------------------------------------------------------------------------------------------------------------------------------|-----------------------------------------------------------------------------------------------------|----------------------------------------------------------------------------------------------------------------------------------------------|----------------------------------------------------------------------------------------------------------------------------------------------------------------------------------------------------------------------------------------------------------------------------------------------------------------------------------------------------------------------------------------------------------------------------------------------------------------------------------------------------|
| EPI_ISL_7543837, EPI_ISL_7543885, EPI_ISL_7544121, EPI_ISL_7544319, EPI_ISL_7544331, EPI_ISL_7544369, EPI_ISL_7544456, EPI_ISL_7544613, EPI_ISL_7544642, EPI_ISL_7544715                                                                                                                                                                                                                                                                                 |                                                                                                     |                                                                                                                                              |                                                                                                                                                                                                                                                                                                                                                                                                                                                                                                    |
| see above                                                                                                                                                                                                                                                                                                                                                                                                                                                | 2 Military Hospital wc MAA                                                                          | NHLS/UCT                                                                                                                                     | Arash Iranzadeh; Bruna Galvao; Carolyn Williamson; Deelan Doolabh; Diana Hardie; Gert Marais; Innocent Mudau; Luicer Olubayo; Lynn Tyers; Marvin Hsiao; Nokuzola Mbhele; Rageema Joseph; Stephen Korsman                                                                                                                                                                                                                                                                                           |
| EPI_ISL_7621467, EPI_ISL_7621483, EPI_ISL_7621936                                                                                                                                                                                                                                                                                                                                                                                                        | 4Cyte Pathology                                                                                     | NSW Health Pathology - Institute of Clinical Pathology and Medical Research; Westmead Hospital; University of Sydney                         | Arnott A.; Draper J.; Gall M.; Martinez E.; Rockett R.; Sintchenko V.; on behalf of ICPMR                                                                                                                                                                                                                                                                                                                                                                                                          |
| EPI_ISL_7495248, EPI_ISL_7495249, EPI_ISL_7495250                                                                                                                                                                                                                                                                                                                                                                                                        | A. Krumbholz, Labor Dr. Krause und Kollegen MVZ GmbH, Kiel                                          | Charité Universitätsmedizin Berlin, Institut für Virologie                                                                                   | Barbara Mühlemann; Christian Drosten; Julia Schneider; Julia Tesch; Jörn Beheim-Schwarzbach; Talitha Veith; Terry Jones; Tobias Bleicker; Victor M Corman                                                                                                                                                                                                                                                                                                                                          |
| EPI_ISL_7405721                                                                                                                                                                                                                                                                                                                                                                                                                                          | A.S.L. CITTA DI TORINO - OSPEDALE AMEDEO DI SAVOIA                                                  | Fondazione del Piemonte per l'Oncologia IRCCS                                                                                                | Antonino Sottile; Giorgio Giardina; Paola Marino; Silvia Brossa                                                                                                                                                                                                                                                                                                                                                                                                                                    |
| EPI_ISL_7306737                                                                                                                                                                                                                                                                                                                                                                                                                                          | A.S.L. TO4                                                                                          | Fondazione del Piemonte per l'Oncologia IRCCS                                                                                                | Antonino Sottile; Giorgio Giardina; Paola Marino; Silvia Brossa                                                                                                                                                                                                                                                                                                                                                                                                                                    |
| EPI_ISL_7016910, EPI_ISL_7569944, EPI_ISL_7569960, EPI_ISL_7569961, EPI_ISL_7569968, EPI_ISL_7569970, EPI_ISL_7569978, EPI_ISL_7569980, EPI_ISL_7569985, EPI_ISL_7569988                                                                                                                                                                                                                                                                                 |                                                                                                     |                                                                                                                                              |                                                                                                                                                                                                                                                                                                                                                                                                                                                                                                    |
| see above                                                                                                                                                                                                                                                                                                                                                                                                                                                | ACT Pathology                                                                                       | Schwessinger Lab                                                                                                                             | Ashley Jones; Austin Bird; Bayantes Dagvadorj; Benjamin Schwessinger; Carl McCombe; Carolina Correa Ospina; Catalina Barragán Quintero; Craig Kennedy; Elise Kellett; Emma Crean; Evie Hodgson; Gabrielle Smith; Karina Kennedy; Rachel Leonard; Rene Riedelbauch; Robyn Hall; Salome Wilson; Scott Ferguson                                                                                                                                                                                       |
| EPI_ISL_6891760, EPI_ISL_7129657, EPI_ISL_7129884, EPI_ISL_7130085, EPI_ISL_7130189, EPI_ISL_7130344, EPI_ISL_7130486                                                                                                                                                                                                                                                                                                                                    |                                                                                                     |                                                                                                                                              |                                                                                                                                                                                                                                                                                                                                                                                                                                                                                                    |
| see above                                                                                                                                                                                                                                                                                                                                                                                                                                                | AGES-Institute for medical Microbiology and Hygiene Vienna                                          | AGES-institute for medical Microbiology and Hygiene Vienna                                                                                   | Alexander Indra; Elisabeth Polster; Florian Heger; Julia Klikovits; Kathrin Lippert; Marion Blaschitz; Patrick Hyden; Peter Hufnagel; Stefanie Dobrovolsky; Vera Wallner                                                                                                                                                                                                                                                                                                                           |
| EPI_ISL_7381191                                                                                                                                                                                                                                                                                                                                                                                                                                          | AHRI                                                                                                | CERI, Centre for Epidemic Response and Innoavtion, Stellenbosch University and KRISP, KZN Research Innovation and Sequencing Platform, UKZN. | Arisha Maharaj; Bernstein Mallory; Cele Sandile; Giandhari J.; Karim Farina; Khan Khadija; Moir M; Naidoo Y; Pillay S; Ramphal U; Ramphal Y; San JE; Sigal Alex; Tegally H; Tshiabula D; Wilkinson E; de Oliveira T; van Wyk S                                                                                                                                                                                                                                                                     |
| EPI_ISL_7358094                                                                                                                                                                                                                                                                                                                                                                                                                                          | AHRI-Sigal                                                                                          | CERI, Centre for Epidemic Response and Innoavtion, Stellenbosch University and KRISP, KZN Research Innovation and Sequencing Platform, UKZN. | Bernstein Mallory; Cele Sandile; Giandhari J.; Karim Farina; Khan Khadija; Moir M; Naidoo Y; Nokukhanya Mdlalose; Pillay S; Ramphal U; Ramphal Y; San JE; Sigal Alex; Tegally H; Tshiabula D; Wilkinson E; de Oliveira T                                                                                                                                                                                                                                                                           |
| EPI_ISL_7644368                                                                                                                                                                                                                                                                                                                                                                                                                                          | AOPD                                                                                                | Istituto Zooprofilattico Sperimentale delle Venezie                                                                                          | Adelaide Milani; Alessia Schivo; Alice Fusaro; Ambra Pastori; Angela Salomoni; Annalisa Salviato; Antonia Ricci; Calogero Terregino; Edoardo Giussani; Elisa Palumbo; Erika Giorgia Quaranta; Isabella Monne                                                                                                                                                                                                                                                                                       |
| EPI_ISL_7637189, EPI_ISL_7637190                                                                                                                                                                                                                                                                                                                                                                                                                         | AULSS 3 Venezia                                                                                     | UOSD Genetica e Citogenetica - Azienda ULSS 3 Serenissima; Istituto Zooprofilattico Sperimentale delle Venezie                               | Adelaide Milani; Alessia Schivo; Alice Fusaro; Ambra Pastori; Angela Salomoni; Annalisa Salviato; Antonia Ricci; Calogero Terregino; Edoardo Giussani; Elisa Palumbo; Elisa Squarcina; Erika Giorgia Quaranta; Isabella Monne; Laura Bevilacqua; Laura Squarzon; Luca Sorino; Mosé Favarato; Noemi Laganà                                                                                                                                                                                          |
| EPI_ISL_7638072                                                                                                                                                                                                                                                                                                                                                                                                                                          | AULSS 8 Berica                                                                                      | Istituto Zooprofilattico Sperimentale delle Venezie                                                                                          | Adelaide Milani; Alessia Schivo; Alice Fusaro; Ambra Pastori; Angela Salomoni; Annalisa Salviato; Antonia Ricci; Calogero Terregino; Edoardo Giussani; Elisa Palumbo; Erika Giorgia Quaranta; Isabella Monne                                                                                                                                                                                                                                                                                       |
| EPI_ISL_7636072                                                                                                                                                                                                                                                                                                                                                                                                                                          | AZDelta                                                                                             | AZ Delta Medical Laboratories in Roeselare, Belgium                                                                                          | Dieter De Smet; Frederik Van Hoecke; Geert Martens; on behalf of AZ Delta COVID-19 Genomics core (member of Genomic surveillance of SARS-CoV-2 in Belgium network)                                                                                                                                                                                                                                                                                                                                 |
| EPI_ISL_7660967, EPI_ISL_7660969                                                                                                                                                                                                                                                                                                                                                                                                                         | Accelerated Clinical Laboratories                                                                   | City of Milwaukee Health Department Laboratory                                                                                               | Amy Bauer; Manjeet Khubbar; Samantha Scott; Sanjib Bhattacharyya                                                                                                                                                                                                                                                                                                                                                                                                                                   |
| EPI_ISL_7154405                                                                                                                                                                                                                                                                                                                                                                                                                                          | Aegis Sciences Corporation                                                                          | Centers for Disease Control and Prevention Division of Viral Diseases, Pathogen Discovery                                                    | Alec Vest; Benjamin Rambo-Martin; Christopher Gulvick; Clinton Paden; Cyndi Clark; Dakota Howard; Dhvani Batra; Dillon Nall; Duncan MacCannell; Erisa Sula; Ethan Sanders; Holly Houdeshell; Jason Caravas; Kristine Lacey; Matthew Hardison; Matthew Schmerer; Ola Kvalvaag; Patrick Campbell; Peter Cook; Rob Case; Scott Sammons; Shatavia Morrison; Shaun Westlund; Tymeckia Kendall; Victoria Caban Figueroa; Vikramsinha Ghorpade; Yvette Unarumhi                                           |
| EPI_ISL_7452769, EPI_ISL_7452775                                                                                                                                                                                                                                                                                                                                                                                                                         | Aesculabur Hamburg, Institut der Labormedizin                                                       | Heinrich Pette Institute, Leibniz Institute for Experimental Virology                                                                        | Adam Grundhoff; Alexis Robitaille; Johannes Knobloch; Martin Aepfelbacher; Nicole Fischer; Thomas Günther                                                                                                                                                                                                                                                                                                                                                                                          |
| EPI_ISL_7470217, EPI_ISL_7470278, EPI_ISL_7470360, EPI_ISL_7470368, EPI_ISL_7470391, EPI_ISL_7470446                                                                                                                                                                                                                                                                                                                                                     | Akershus University Hospital, Department for Microbiology and Infectious Disease Control            | Norwegian Institute of Public Health, Department of Virology                                                                                 | Atiya R Ali; Debec Nadia; Engebretsen Serina Beate; Garcia Llorente Ignacio; Hilde Elshaug; Hilde Vollen; Jon Bråte; Kamilla Heddeland Instefjord; Karoline Bragstad; Kathrine Stene-Johansen; Line Victoria Moen; Marie Paulsen Madsen; Olav Hungnes; Pedersen Benedikte Nevjen; Rasmus Riis Kopperud                                                                                                                                                                                             |
| EPI_ISL_7620089                                                                                                                                                                                                                                                                                                                                                                                                                                          | Alaska State Virology Laboratory                                                                    | Alaska State Virology Laboratory                                                                                                             | Elva House; Jack Chen; Jacob Zidek; Jeremy Roe; Lisa Smith; Ph.D.                                                                                                                                                                                                                                                                                                                                                                                                                                  |
| EPI_ISL_7146436, EPI_ISL_7506705                                                                                                                                                                                                                                                                                                                                                                                                                         | Allergy, Immunology and Cell Biology Unit (AICBU)                                                   | Allergy, Immunology and Cell Biology Unit (AICBU)                                                                                            | Ayesha Wijesinghe; Chandima Jeewandara; Deshni Jayathilaka; Dinuka Ariyaratne; Diyanath Ranasinghe; Dumni Guasinghe; Farha Bary; Gathsaurie Neelika Malavige; Tibutus Thanesh                                                                                                                                                                                                                                                                                                                      |
| EPI_ISL_7544441                                                                                                                                                                                                                                                                                                                                                                                                                                          | Alma CDC wc AHC                                                                                     | NHLS/UCT                                                                                                                                     | Arash Iranzadeh; Bruna Galvao; Carolyn Williamson; Deelan Doolabh; Diana Hardie; Gert Marais; Innocent Mudau; Luicer Olubayo; Lynn Tyers; Marvin Hsiao; Nokuzola Mbhele; Rageema Joseph; Stephen Korsman                                                                                                                                                                                                                                                                                           |
| EPI_ISL_7264139, EPI_ISL_7265455, EPI_ISL_7265456                                                                                                                                                                                                                                                                                                                                                                                                        | Alpha Labs                                                                                          | National Microbiology Laboratory (NML)                                                                                                       | Anna Majer; Anneliese Landgraff; CanCOGeN's metadata curation team; Darian Hole; Dynacare Brampton COVID-19 Diagnostic team; Elsie Grudeski; Gary Van Domselaar; Gordon Jolly; Grace Seo; Jennifer Tanner; Madison Chapel; Morag Graham; Natalie Knox; Nathalie Bastien; Philip Mabon; Public Health Agency of Canada CanCOGeN team; Rhiannon Huzarewich; Russell Mandes; Shari Tyson; Timothy Booth; Yan Li                                                                                       |
| EPI_ISL_6914011, EPI_ISL_6914012, EPI_ISL_6914013, EPI_ISL_6914014, EPI_ISL_6914015, EPI_ISL_6914016, EPI_ISL_6914017, EPI_ISL_6914018, EPI_ISL_6914019, EPI_ISL_6914020, EPI_ISL_6914021, EPI_ISL_6914022, EPI_ISL_6914023, EPI_ISL_6914024, EPI_ISL_6914025, EPI_ISL_6914026, EPI_ISL_6914027, EPI_ISL_6914028, EPI_ISL_6914029, EPI_ISL_6914030, EPI_ISL_6914031, EPI_ISL_6914032, EPI_ISL_6914033, EPI_ISL_6914034, EPI_ISL_6914035, EPI_ISL_6914036 |                                                                                                     |                                                                                                                                              |                                                                                                                                                                                                                                                                                                                                                                                                                                                                                                    |
| see above                                                                                                                                                                                                                                                                                                                                                                                                                                                | Ampanth Laboratories                                                                                | National Institute for Communicable Diseases of the National Health Laboratory Service                                                       | Amoako DG; Bhiman JN; Everatt J; Ismail A; Mahlangu B; Mnguni A; Mohale T; Ntuli N; Scheepers C; Wolter N                                                                                                                                                                                                                                                                                                                                                                                          |
| EPI_ISL_7605587, EPI_ISL_7605639, EPI_ISL_7605640, EPI_ISL_7605743, EPI_ISL_7605745                                                                                                                                                                                                                                                                                                                                                                      | Anglo American                                                                                      | National Institute for Communicable Diseases of the National Health Laboratory Service                                                       | Amoako DG; Bhiman JN; Everatt J; Ismail A; Mahlangu B; Mnguni A; Mohale T; Ntuli N; Scheepers C; Wolter N                                                                                                                                                                                                                                                                                                                                                                                          |
| EPI_ISL_7011321, EPI_ISL_7568602                                                                                                                                                                                                                                                                                                                                                                                                                         | Area of Virology, Serology and Virology Division (SAVID), New South Wales Health Pathology Randwick | Virology Research Laboratory; Area of Virology, Serology and Virology Division (SAVID), New South Wales Health Pathology Randwick            | Au, J.; Bull, R.; Deveson, I.; Foster, C.; Rawlinson, W.; Ruiz Silva, M.; Van Hal, S.                                                                                                                                                                                                                                                                                                                                                                                                              |
| EPI_ISL_7503376, EPI_ISL_7503377, EPI_ISL_7503378, EPI_ISL_7548950, EPI_ISL_7548951, EPI_ISL_7548952                                                                                                                                                                                                                                                                                                                                                     | Arizona State University                                                                            | Arizona State University                                                                                                                     | Efrem S. Lim; Joshua LaBaer; LaRinda A. Holland; Matthew F. Smith; Nathaniel Johnson; Regan A. Sullins; Steven C. Holland; Vel Murugan                                                                                                                                                                                                                                                                                                                                                             |
| EPI_ISL_6963510                                                                                                                                                                                                                                                                                                                                                                                                                                          | Auriga Research Pvt.Ltd / Strand Life Sciences                                                      | National Centre for Biological Sciences, TIFR - Rockefeller Foundation                                                                       | Aarati Karaba; Anson Kunjumon George; Aparnaa Ramanathan; Apurva Sarin; Chandrasekhar Vadlamudi; Chitra Pattabiraman; Darshan Sreenivas; Dasaradhi Palakodeti; Dimple Notani; Divya Priya A; Madhusudhan J; Manisha Bharadwaj; Manoj Kumar Jha; Mudasir Nazaar; Pradeep B P; Priyanka Ananta Mulay; Ramesh Hariharan; Rohan Pais; Satyajit Mayor; Saumitra Mardikar; Srivathsan Adimoolam; Uma Ramakrishnan; Vamsi Veeramachaneni; Vasanthapuram Ravi; Vijay Chandru; Vishal G Rao; Yasodha Kannan |
| EPI_ISL_7621950, EPI_ISL_7621951, EPI_ISL_7621953, EPI_ISL_7621957                                                                                                                                                                                                                                                                                                                                                                                       | Australian Clinical Labs (formerly Healthscope Pathology)                                           | NSW Health Pathology - Institute of Clinical Pathology and Medical Research; Westmead Hospital; University of Sydney                         | Arnott A.; Draper J.; Gall M.; Martinez E.; Rockett R.; Sintchenko V.; on behalf of ICPMR                                                                                                                                                                                                                                                                                                                                                                                                          |
| EPI_ISL_7195246,                                                                                                                                                                                                                                                                                                                                                                                                                                         | Austrian Agency for Health and Food                                                                 | Bergthaler laboratory, CeMM Research                                                                                                         | Andreas Bergthaler; Anna Schedi; Bekir Erguner; Benedikt Agerer; Christoph Bock; Fabian Amman; Jan Laine; Lukas Endler; Martin Senekowitsch; Matthew Thornton; Michael Schuster; Michelle Chan; Petr Triska; Thomas Penz                                                                                                                                                                                                                                                                           |

|                                                                                                                                                                                                                                                                                                                                                                                                                                                                                                                                                                                                                                                                                                                                                                                                                                                                                                                                                                                                                                                                                              |                                                                                           |                                                                                                                                                                                                                                                                                                              |                                                                                                                                                                                                                                                                                                                                                                                                                                                                        |
|----------------------------------------------------------------------------------------------------------------------------------------------------------------------------------------------------------------------------------------------------------------------------------------------------------------------------------------------------------------------------------------------------------------------------------------------------------------------------------------------------------------------------------------------------------------------------------------------------------------------------------------------------------------------------------------------------------------------------------------------------------------------------------------------------------------------------------------------------------------------------------------------------------------------------------------------------------------------------------------------------------------------------------------------------------------------------------------------|-------------------------------------------------------------------------------------------|--------------------------------------------------------------------------------------------------------------------------------------------------------------------------------------------------------------------------------------------------------------------------------------------------------------|------------------------------------------------------------------------------------------------------------------------------------------------------------------------------------------------------------------------------------------------------------------------------------------------------------------------------------------------------------------------------------------------------------------------------------------------------------------------|
| EPI_ISL_7195247,<br>EPI_ISL_7195248                                                                                                                                                                                                                                                                                                                                                                                                                                                                                                                                                                                                                                                                                                                                                                                                                                                                                                                                                                                                                                                          | Safety (AGES)                                                                             | Center for Molecular Medicine of the Austrian Academy of Sciences                                                                                                                                                                                                                                            |                                                                                                                                                                                                                                                                                                                                                                                                                                                                        |
| EPI_ISL_7502111,<br>EPI_ISL_7616000                                                                                                                                                                                                                                                                                                                                                                                                                                                                                                                                                                                                                                                                                                                                                                                                                                                                                                                                                                                                                                                          | Ayass Bioscience LLC                                                                      | Ayass Bioscience LLC                                                                                                                                                                                                                                                                                         | Kevin Zhu; Lina Abi Mosleh; Mohamad Ammar Ayass; Natalya Griko; Nazanin Taheri                                                                                                                                                                                                                                                                                                                                                                                         |
| EPI_ISL_7400565                                                                                                                                                                                                                                                                                                                                                                                                                                                                                                                                                                                                                                                                                                                                                                                                                                                                                                                                                                                                                                                                              | Azienda Ospedaliera Pugliese Ciaccio di Catanzaro SOC Microbiologia e Virologia           | Azienda Ospedaliera Pugliese Ciaccio di Catanzaro SOC Microbiologia e Virologia                                                                                                                                                                                                                              | Rossana Talerico Cinzia Peronace Federica Pasceri Marco De Fazio Ilenia Talotta Giuseppina Panduri Pasquale Minchella                                                                                                                                                                                                                                                                                                                                                  |
| EPI_ISL_7338921                                                                                                                                                                                                                                                                                                                                                                                                                                                                                                                                                                                                                                                                                                                                                                                                                                                                                                                                                                                                                                                                              | Azienda Sanitaria dell'Alto Adige - Laboratorio Aziendale di Microbiologia e Virologia    | Azienda Sanitaria dell'Alto Adige                                                                                                                                                                                                                                                                            | Irene Bianconi                                                                                                                                                                                                                                                                                                                                                                                                                                                         |
| EPI_ISL_7226262                                                                                                                                                                                                                                                                                                                                                                                                                                                                                                                                                                                                                                                                                                                                                                                                                                                                                                                                                                                                                                                                              | BNH Hospital                                                                              | National Institute of Health, Department of Medical Sciences, Ministry of Public Health, Thailand                                                                                                                                                                                                            | Archawin Rojanawitwat; Ballang Uppamong; Beth Skaggs; Donlaya Maunplueg; Kazuhisa Okada; Nuttida Thongpramol; Pakorn Piromtong; Pilailuk Akkapaaboon Okada; Piroon Jenjaroenpun; Pongpun Sawatwong; Prapat Suriyaphol; Sirikanda Wimol; Siriraporn Phuyung; Sittiporn Parmnen; Supakit Sirilak; Suratchana Mitrat; Thanutsapa Thanadachakul; Thidathip Wongsurawat                                                                                                     |
| EPI_ISL_7612892                                                                                                                                                                                                                                                                                                                                                                                                                                                                                                                                                                                                                                                                                                                                                                                                                                                                                                                                                                                                                                                                              | BUMC Transplant Immunology Lab                                                            | BUMC Transplant Immunology Lab                                                                                                                                                                                                                                                                               | Amanda Willis; Chiensao Wang; Jenifer Williams; Lynne Klingman; Medhat Askar; Pete Dysert                                                                                                                                                                                                                                                                                                                                                                              |
| EPI_ISL_7565149,<br>EPI_ISL_7565152                                                                                                                                                                                                                                                                                                                                                                                                                                                                                                                                                                                                                                                                                                                                                                                                                                                                                                                                                                                                                                                          | Bari                                                                                      | University of Bari Biomedical Sciences and Human Oncology                                                                                                                                                                                                                                                    | Maria Chironna                                                                                                                                                                                                                                                                                                                                                                                                                                                         |
| EPI_ISL_7149647, EPI_ISL_7197950, EPI_ISL_7346925, EPI_ISL_7347257, EPI_ISL_7347522, EPI_ISL_7355779, EPI_ISL_7391885, EPI_ISL_7391908, EPI_ISL_7391931, EPI_ISL_7391984, EPI_ISL_7392005, EPI_ISL_7392027, EPI_ISL_7392079, EPI_ISL_7392087, EPI_ISL_7392093, EPI_ISL_7392139, EPI_ISL_7485998, EPI_ISL_7486106, EPI_ISL_7486193, EPI_ISL_7486452, EPI_ISL_7486697, EPI_ISL_7486742, EPI_ISL_7486808, EPI_ISL_7486814, EPI_ISL_7486850, EPI_ISL_7486923, EPI_ISL_7487524, EPI_ISL_7487623, EPI_ISL_7487665, EPI_ISL_7487692, EPI_ISL_7512352, EPI_ISL_7512373, EPI_ISL_7512378, EPI_ISL_7512381, EPI_ISL_7512410, EPI_ISL_7512438, EPI_ISL_7512444, EPI_ISL_7512448, EPI_ISL_7520500, EPI_ISL_7538419, EPI_ISL_7538437, EPI_ISL_7538529, EPI_ISL_7538539, EPI_ISL_7538562, EPI_ISL_7538591, EPI_ISL_7538628, EPI_ISL_7538662, EPI_ISL_7538687, EPI_ISL_7538812, EPI_ISL_7538904, EPI_ISL_7538983, EPI_ISL_7538987, EPI_ISL_7539009, EPI_ISL_7539114, EPI_ISL_7539140, EPI_ISL_7539157, EPI_ISL_7539216, EPI_ISL_7539258, EPI_ISL_7539330, EPI_ISL_7539539, EPI_ISL_7539677, EPI_ISL_7539761 | Wellcome Sanger Institute for the COVID-19 Genomics UK (COG-UK) Consortium                | Berkshire and Surrey Pathology Services Lighthouse Laboratory and Alex Alderton; Cordelia Langford; David K. Jackson; Dominic Kwiatkowski; Ewan Harrison; Ian Johnston; Jeffrey Barrett; John Sillitoe on behalf of the Wellcome Sanger Institute COVID-19 Surveillance Team; Roberto Amato; Sonia Goncalves |                                                                                                                                                                                                                                                                                                                                                                                                                                                                        |
| see above                                                                                                                                                                                                                                                                                                                                                                                                                                                                                                                                                                                                                                                                                                                                                                                                                                                                                                                                                                                                                                                                                    | Berkshire and Surrey Pathology Services Lighthouse Laboratory                             | Wellcome Sanger Institute for the COVID-19 Genomics UK (COG-UK) Consortium                                                                                                                                                                                                                                   | Berkshire and Surrey Pathology Services Lighthouse Laboratory and Alex Alderton; Cordelia Langford; David K. Jackson; Dominic Kwiatkowski; Ewan Harrison; Ian Johnston; Jeffrey Barrett; John Sillitoe on behalf of the Wellcome Sanger Institute COVID-19 Surveillance Team; Roberto Amato; Sonia Goncalves                                                                                                                                                           |
| EPI_ISL_7464464,<br>EPI_ISL_7464465,<br>EPI_ISL_7662094,<br>EPI_ISL_7662095                                                                                                                                                                                                                                                                                                                                                                                                                                                                                                                                                                                                                                                                                                                                                                                                                                                                                                                                                                                                                  | Biolab Diagnostic Laboratories                                                            | Biolab Diagnostic Laboratories                                                                                                                                                                                                                                                                               | Ahmad Tibi; Amid Abdelnour; Badia Sadeddin; Eiad Atwa; Issa Abu-Dayyeh; Lama Hussein; Shaima Ali                                                                                                                                                                                                                                                                                                                                                                       |
| EPI_ISL_7042354                                                                                                                                                                                                                                                                                                                                                                                                                                                                                                                                                                                                                                                                                                                                                                                                                                                                                                                                                                                                                                                                              | Biolytix AG                                                                               | Clinical Bacteriology, University Hospital Basel                                                                                                                                                                                                                                                             | Adrian Egli; Alfredo Mari; Fanny Wegner; Hans Hirsch; Helena MB Seth-Smith; Julia Bielicki; Karoline Leuzinger; Manuel Battegay; Tim Roloff                                                                                                                                                                                                                                                                                                                            |
| EPI_ISL_7417514                                                                                                                                                                                                                                                                                                                                                                                                                                                                                                                                                                                                                                                                                                                                                                                                                                                                                                                                                                                                                                                                              | Bioscientia Labor Wermsdorf                                                               | Robert Koch Institute                                                                                                                                                                                                                                                                                        |                                                                                                                                                                                                                                                                                                                                                                                                                                                                        |
| EPI_ISL_7544135,<br>EPI_ISL_7544479,<br>EPI_ISL_7544573                                                                                                                                                                                                                                                                                                                                                                                                                                                                                                                                                                                                                                                                                                                                                                                                                                                                                                                                                                                                                                      | Bothasig CDC wc BLD                                                                       | NHLS/UCT                                                                                                                                                                                                                                                                                                     | Arash Iranzadeh; Bruna Galvao; Carolyn Williamson; Deelan Doolabh; Diana Hardie; Gert Marais; Innocent Mudau; Luicer Ontlubaayo; Lynn Tyers; Marvin Hsiao; Nokuzola Mbhele; Rageema Joseph; Stephen Korsman                                                                                                                                                                                                                                                            |
| EPI_ISL_7548902, EPI_ISL_7548903, EPI_ISL_7548904, EPI_ISL_7548905, EPI_ISL_7548906, EPI_ISL_7548909, EPI_ISL_7548914, EPI_ISL_7548917, EPI_ISL_7548931, EPI_ISL_7552698, EPI_ISL_7552699, EPI_ISL_7566328, EPI_ISL_7566330, EPI_ISL_7566360                                                                                                                                                                                                                                                                                                                                                                                                                                                                                                                                                                                                                                                                                                                                                                                                                                                 | Botswana Harvard HIV Reference Laboratory                                                 | Botswana Harvard AIDS Institute Partnership, Plot 1836 North Ring Road, Princess Marina Hospital, Gaborone                                                                                                                                                                                                   | Boitumelo Zuze; Botshelo Radibe; Dorcas Maruapula; Doreen Ditshwanelo; Joseph Makheha; Keoratile Ntshambiwa; Kgomotso Moruisi; Legodile Kooepile; Mosepele Mosepele; Mphaphi B. Mbulawa; Ontlametse T. Bareng; Pamela Smith-Lawrence; Roger Shapiro; Sefetogi Ramaologa; Shahin Lockman; Sikhulile Moyo; Simani Gaseitsiwe; Thongbotho Mphoyakgosi; Wonderful T. Choga                                                                                                 |
| EPI_ISL_6640916, EPI_ISL_6640917, EPI_ISL_6640919, EPI_ISL_6670244, EPI_ISL_6752026, EPI_ISL_6752027, EPI_ISL_6774081, EPI_ISL_6774083, EPI_ISL_6774084, EPI_ISL_6774085, EPI_ISL_6774087, EPI_ISL_6774088, EPI_ISL_6774089, EPI_ISL_6774090, EPI_ISL_6774091, EPI_ISL_6774093, EPI_ISL_7121195, EPI_ISL_7380512, EPI_ISL_7380515, EPI_ISL_7380524                                                                                                                                                                                                                                                                                                                                                                                                                                                                                                                                                                                                                                                                                                                                           | Botswana Harvard HIV Reference Laboratory                                                 | Botswana Harvard HIV Reference Laboratory                                                                                                                                                                                                                                                                    | Boitumelo Zuze; Botshelo Radibe; Dorcas Maruapula; Joseph Makheha; Keoratile Ntshambiwa; Kgomotso Moruisi; Legodile Kooepile; Mosepele Mosepele; Mphaphi B. Mbulawa; Ontlametse T. Bareng; Pamela Smith-Lawrence; Roger Shapiro; Sefetogi Ramaologa; Shahin Lockman; Sikhulile Moyo; Simani Gaseitsiwe; Thongbotho Mphoyakgosi; Wonderful T. Choga                                                                                                                     |
| EPI_ISL_7132804,<br>EPI_ISL_7370157,<br>EPI_ISL_7370181,<br>EPI_ISL_7370259,<br>EPI_ISL_7370472                                                                                                                                                                                                                                                                                                                                                                                                                                                                                                                                                                                                                                                                                                                                                                                                                                                                                                                                                                                              | British Columbia Centre For Disease Control                                               | BCCDC Public Health Laboratory                                                                                                                                                                                                                                                                               | 655 W 12th Avenue; Ana Pacagnella; BC Canada V5T 2N3; Corrine Ng; Dan Fornika; John Tyson; Kim Macdonald; Kimia Kameliani; Linda Hoang; Loretta Janz; Mel Krajdjen; Prystajecy Natalie; Robert Azana; Shannon Russell; Vancouver                                                                                                                                                                                                                                       |
| EPI_ISL_7390696, EPI_ISL_7391208, EPI_ISL_7453171, EPI_ISL_7453991, EPI_ISL_7454277, EPI_ISL_7542815, EPI_ISL_7543162, EPI_ISL_7543543, EPI_ISL_7543579, EPI_ISL_7544427, EPI_ISL_7544520, EPI_ISL_7547858, EPI_ISL_7548157, EPI_ISL_7550313, EPI_ISL_7550474, EPI_ISL_7550515, EPI_ISL_7550529, EPI_ISL_7550748, EPI_ISL_7658881, EPI_ISL_7658932                                                                                                                                                                                                                                                                                                                                                                                                                                                                                                                                                                                                                                                                                                                                           | Broad Institute Clinical Research Sequencing Platform                                     | Infectious Disease Program, Broad Institute of Harvard and MIT                                                                                                                                                                                                                                               | Adams, G.; B.L.; B.W.; Bauer, M.; Birren; Blumenstiel, B.; Brown, C.; Carter, A.; Chaluvadi, S.; D.J.; DeFelice, M.; DeRuff, K.; Dodge, S.; Gabriel, S.; Gallagher, G.; Gladden-Young, A.; Granger, B.; J.E.; K.J.; Lagerborg, K.; Larkin, K.; Lee, M.; Lemieux; Lennon, N.; Loreth, C.; Madoff, L.; McGovern, S.; Meldrim, J.; Normandin, E.; P.C.; Park; Pearlman, L.; Reilly, S.; Rudy, M.; Sabeti; Siddie; Smole, S.; Tomkins-Tinch, C.; Vicente, G.; and MacInnis |
| EPI_ISL_7263830                                                                                                                                                                                                                                                                                                                                                                                                                                                                                                                                                                                                                                                                                                                                                                                                                                                                                                                                                                                                                                                                              | CAP Roger de Flor                                                                         | Banc de Sang i Teixits                                                                                                                                                                                                                                                                                       | Carlos Hoebich; Francisco Vidal; Irene Corrales; Lorena Ramirez; Maria G6ria Soria; Nat6lia Comes; Nina Borr6s; Noemi Gonzalez; Silvia Sauleda                                                                                                                                                                                                                                                                                                                         |
| EPI_ISL_7477252                                                                                                                                                                                                                                                                                                                                                                                                                                                                                                                                                                                                                                                                                                                                                                                                                                                                                                                                                                                                                                                                              | CDPH VBL                                                                                  | California Department of Public Health                                                                                                                                                                                                                                                                       | Emily Smith on behalf of CDPH-COVIDNet                                                                                                                                                                                                                                                                                                                                                                                                                                 |
| EPI_ISL_7427856                                                                                                                                                                                                                                                                                                                                                                                                                                                                                                                                                                                                                                                                                                                                                                                                                                                                                                                                                                                                                                                                              | CENTOGENE Frankfurt Laboratory; Niederlassung Industriepark H6chst                        | Robert Koch Institute                                                                                                                                                                                                                                                                                        |                                                                                                                                                                                                                                                                                                                                                                                                                                                                        |
| EPI_ISL_7547731                                                                                                                                                                                                                                                                                                                                                                                                                                                                                                                                                                                                                                                                                                                                                                                                                                                                                                                                                                                                                                                                              | CENTOLAB                                                                                  | National Reference Laboratory, Nigeria Centre for Disease Control                                                                                                                                                                                                                                            | Catherine Okoi; Chimaobi Chukwu; Dr Ifedayo Adetifa; Dr Ndodo Nnaemeka; Dr Omoare Adesuyi; Nwando Mba; Olajumoke Babatunde; Olusola Anuoluwapo Akanni; Oyeronke Ayansola                                                                                                                                                                                                                                                                                               |
| EPI_ISL_6862897                                                                                                                                                                                                                                                                                                                                                                                                                                                                                                                                                                                                                                                                                                                                                                                                                                                                                                                                                                                                                                                                              | CERBALLIANCE                                                                              | UMR PIMIT                                                                                                                                                                                                                                                                                                    | David A Wilkinson; Patrick Mavingui                                                                                                                                                                                                                                                                                                                                                                                                                                    |
| EPI_ISL_6962948,<br>EPI_ISL_6967758                                                                                                                                                                                                                                                                                                                                                                                                                                                                                                                                                                                                                                                                                                                                                                                                                                                                                                                                                                                                                                                          | CERBALLIANCE PARIS ET IDF EST                                                             | CERBA HealthCare                                                                                                                                                                                                                                                                                             | B6n6dicte Roquebert; Johanna Roux; Judith Zerah; Laura Verdurme; Sabine Trombert; St6phanie Haim-Boukobza                                                                                                                                                                                                                                                                                                                                                              |
| EPI_ISL_7650614,<br>EPI_ISL_7650626                                                                                                                                                                                                                                                                                                                                                                                                                                                                                                                                                                                                                                                                                                                                                                                                                                                                                                                                                                                                                                                          | CHU BORDEAUX                                                                              | CHU BORDEAUX                                                                                                                                                                                                                                                                                                 | Agn6s George-Walryck; Laurent Busson; Marie-Edith Lafon; Pantxika Bellecave; Valentine Lesourd-Aubert                                                                                                                                                                                                                                                                                                                                                                  |
| EPI_ISL_7226961                                                                                                                                                                                                                                                                                                                                                                                                                                                                                                                                                                                                                                                                                                                                                                                                                                                                                                                                                                                                                                                                              | CHU de Bordeaux                                                                           | CNR Virus des Infections Respiratoires - France SUD                                                                                                                                                                                                                                                          | Antonin Bal; Bruno Lina; Bruno Simon; Denis Malvy; Gregory Destras; Gwendolyne Burflin; Hadrien Regue; Laurence Josset; Marie-Edith Lafon; Martine Valette; Pantxika Bellecave; Quentin Semanas                                                                                                                                                                                                                                                                        |
| EPI_ISL_7268670,<br>EPI_ISL_7269933                                                                                                                                                                                                                                                                                                                                                                                                                                                                                                                                                                                                                                                                                                                                                                                                                                                                                                                                                                                                                                                          | CLINA-LANCET LABORATORIES                                                                 | National Reference Laboratory, Nigeria Centre for Disease Control                                                                                                                                                                                                                                            | Catherine Okoi; Chimaobi Chukwu; Dr Ifedayo Adetifa; Dr Ndodo Nnaemeka; Dr Omoare Adesuyi; Nwando Mba; Olajumoke Babatunde; Olusola Anuoluwapo Akanni; Oyeronke Ayansola                                                                                                                                                                                                                                                                                               |
| EPI_ISL_7313633                                                                                                                                                                                                                                                                                                                                                                                                                                                                                                                                                                                                                                                                                                                                                                                                                                                                                                                                                                                                                                                                              | CT Department of Public Health                                                            | CT Department of Public Health                                                                                                                                                                                                                                                                               | Claire Pearson; Tu N. Nguyen                                                                                                                                                                                                                                                                                                                                                                                                                                           |
| EPI_ISL_7137326,<br>EPI_ISL_7137327,<br>EPI_ISL_7137328,<br>EPI_ISL_7137330                                                                                                                                                                                                                                                                                                                                                                                                                                                                                                                                                                                                                                                                                                                                                                                                                                                                                                                                                                                                                  | California Department of Public Health                                                    | California Department of Public Health                                                                                                                                                                                                                                                                       | CDPH IDLB COVIDNet                                                                                                                                                                                                                                                                                                                                                                                                                                                     |
| EPI_ISL_7217437,<br>EPI_ISL_7217563                                                                                                                                                                                                                                                                                                                                                                                                                                                                                                                                                                                                                                                                                                                                                                                                                                                                                                                                                                                                                                                          | Cantacuzino National Military-Medical Institute, Viral Respiratory Infections Laboratory  | Cantacuzino Institute Virology                                                                                                                                                                                                                                                                               | Luiza Ustea; Mihaela Lazar; Mihaela Oprea; Nicoleta Paraschiv; Sorin Dinu                                                                                                                                                                                                                                                                                                                                                                                              |
| EPI_ISL_7660838                                                                                                                                                                                                                                                                                                                                                                                                                                                                                                                                                                                                                                                                                                                                                                                                                                                                                                                                                                                                                                                                              | Center of Medical Microbiology, Virology, and Hospital Hygiene, University of Duesseldorf | Center of Medical Microbiology, Virology, and Hospital Hygiene, University of Duesseldorf                                                                                                                                                                                                                    | Alexander Dilthey; Andreas Walker; Daniel Strelow; Jessica Nicolai; J6rg Timm; Klaus Pfeffer; Lisanna H6lse; Malte Kohns Vasconcelos; Maximilian Damagnez; Nadine L6bke; Tobias Wienemann; Torsten Houwaart                                                                                                                                                                                                                                                            |
| EPI_ISL_7571582                                                                                                                                                                                                                                                                                                                                                                                                                                                                                                                                                                                                                                                                                                                                                                                                                                                                                                                                                                                                                                                                              | Centre Hospitalier Universitaire Clermont-Ferrand                                         | CHU Clermont-Ferrand, service de virologie                                                                                                                                                                                                                                                                   | Bisieux Maxime; Combes Patricia; Henquell Cecile; Mirand Audrey                                                                                                                                                                                                                                                                                                                                                                                                        |
| EPI_ISL_6980876                                                                                                                                                                                                                                                                                                                                                                                                                                                                                                                                                                                                                                                                                                                                                                                                                                                                                                                                                                                                                                                                              | Cerballiance, Reunion                                                                     | UMR PIMIT                                                                                                                                                                                                                                                                                                    | David A Wilkinson; Patrick Mavingui                                                                                                                                                                                                                                                                                                                                                                                                                                    |
| EPI_ISL_7019047                                                                                                                                                                                                                                                                                                                                                                                                                                                                                                                                                                                                                                                                                                                                                                                                                                                                                                                                                                                                                                                                              | Charit6 Universit6tsmedizin Berlin, Institute of Virology                                 | Charit6 Universit6tsmedizin Berlin, Institute of Virology                                                                                                                                                                                                                                                    | Barbara M6hleemann; Christian Drosten; Julia Schneider; Julia Tesch; J6rn Beheim-Schwarzbach; Talitha Veith; Terry Jones; Tobias Bleicker; Victor M Cormann                                                                                                                                                                                                                                                                                                            |
| EPI_ISL_7337463, EPI_ISL_7337464, EPI_ISL_7337465, EPI_ISL_7337466, EPI_ISL_7337468, EPI_ISL_7337469, EPI_ISL_7337470, EPI_ISL_7337471, EPI_ISL_7337472, EPI_ISL_7337473, EPI_ISL_7337474, EPI_ISL_7337475, EPI_ISL_7337476, EPI_ISL_7337477, EPI_ISL_7337478, EPI_ISL_7337479, EPI_ISL_7337480, EPI_ISL_7337481, EPI_ISL_7337482, EPI_ISL_7337483, EPI_ISL_7337484, EPI_ISL_7337485, EPI_ISL_7337486, EPI_ISL_7337488, EPI_ISL_7337489, EPI_ISL_7337490, EPI_ISL_7337495, EPI_ISL_7337496, EPI_ISL_7337497, EPI_ISL_7337498, EPI_ISL_7337499, EPI_ISL_7337500, EPI_ISL_7337501, EPI_ISL_7337503, EPI_ISL_7337504, EPI_ISL_7337505, EPI_ISL_7337506, EPI_ISL_7337507, EPI_ISL_7337508, EPI_ISL_7337509, EPI_ISL_7337510, EPI_ISL_7337511                                                                                                                                                                                                                                                                                                                                                     | National Institute for Communicable Diseases of the National Health Laboratory Service    | Amoako DG; Bhiman JN; Everatt J; Ismail A; Mahlangu B; Mnguni A; Mohale T; Ntuli N; Scheepers C                                                                                                                                                                                                              |                                                                                                                                                                                                                                                                                                                                                                                                                                                                        |
| see above                                                                                                                                                                                                                                                                                                                                                                                                                                                                                                                                                                                                                                                                                                                                                                                                                                                                                                                                                                                                                                                                                    | Charlotte Maxeke Johannesburg Academic Hospital                                           | National Institute for Communicable Diseases of the National Health Laboratory Service                                                                                                                                                                                                                       | Amoako DG; Bhiman JN; Everatt J; Ismail A; Mahlangu B; Mnguni A; Mohale T; Ntuli N; Scheepers C                                                                                                                                                                                                                                                                                                                                                                        |
| EPI_ISL_7337512, EPI_ISL_7337513, EPI_ISL_7337515, EPI_ISL_7337516, EPI_ISL_7337517, EPI_ISL_7337518, EPI_ISL_7337520, EPI_ISL_7337521, EPI_ISL_7337524, EPI_ISL_7337525, EPI_ISL_7337527, EPI_ISL_7337528, EPI_ISL_7337531, EPI_ISL_7337532, EPI_ISL_7337533, EPI_ISL_7337534, EPI_ISL_7337535, EPI_ISL_7337536, EPI_ISL_7337537, EPI_ISL_7337538, EPI_ISL_7337539, EPI_ISL_7337540, EPI_ISL_7337541, EPI_ISL_7337542, EPI_ISL_7337543, EPI_ISL_7337544, EPI_ISL_7337545, EPI_ISL_7337546, EPI_ISL_7337547, EPI_ISL_7337548, EPI_ISL_7337549, EPI_ISL_7337550, EPI_ISL_7337551, EPI_ISL_7337552, EPI_ISL_7337553, EPI_ISL_7337558, EPI_ISL_7337559, EPI_ISL_7337560, EPI_ISL_7337561, EPI_ISL_7337562, EPI_ISL_7337563, EPI_ISL_7337564                                                                                                                                                                                                                                                                                                                                                     | Chris Hani Baragwanath Laboratory                                                         | National Institute for Communicable Diseases of the National Health Laboratory Service                                                                                                                                                                                                                       | Amoako DG; Bhiman JN; Everatt J; Ismail A; Mahlangu B; Mnguni A; Mohale T; Ntuli N; Scheepers C                                                                                                                                                                                                                                                                                                                                                                        |
| see above                                                                                                                                                                                                                                                                                                                                                                                                                                                                                                                                                                                                                                                                                                                                                                                                                                                                                                                                                                                                                                                                                    | Chris Hani Baragwanath Laboratory                                                         | National Institute for Communicable Diseases of the National Health Laboratory Service                                                                                                                                                                                                                       | Amoako DG; Bhiman JN; Everatt J; Ismail A; Mahlangu B; Mnguni A; Mohale T; Ntuli N; Scheepers C                                                                                                                                                                                                                                                                                                                                                                        |
| EPI_ISL_7154390                                                                                                                                                                                                                                                                                                                                                                                                                                                                                                                                                                                                                                                                                                                                                                                                                                                                                                                                                                                                                                                                              | Clina-Lancet                                                                              | National Reference Laboratory, Nigeria Centre for Disease Control                                                                                                                                                                                                                                            | Catherine Okoi; Chimaobi Chukwu; Dr Ifedayo Adetifa; Dr Ndodo Nnaemeka; Dr Omoare Adesuyi; Nwando Mba; Olajumoke Babatunde; Olusola Anuoluwapo Akanni; Oyeronke Ayansola                                                                                                                                                                                                                                                                                               |
| EPI_ISL_7265967, EPI_ISL_7265976, EPI_ISL_7265979, EPI_ISL_7266027, EPI_ISL_7266045, EPI_ISL_7266056, EPI_ISL_7266061, EPI_ISL_7266083, EPI_ISL_7552013, EPI_ISL_7552178, EPI_ISL_7552184, EPI_ISL_7552302, EPI_ISL_7552311, EPI_ISL_7552313, EPI_ISL_7552316, EPI_ISL_7552499, EPI_ISL_7552502, EPI_ISL_7552514, EPI_ISL_7552588, EPI_ISL_7552623, EPI_ISL_7552635, EPI_ISL_7552636                                                                                                                                                                                                                                                                                                                                                                                                                                                                                                                                                                                                                                                                                                         |                                                                                           |                                                                                                                                                                                                                                                                                                              |                                                                                                                                                                                                                                                                                                                                                                                                                                                                        |

|                                                                                                                                                                                                                                                                                                                                                                                                                                                                                                                                                                                                                                                                                                                                                                                                                                                                                                                                                                                                                                                                                                                                                                                                                                                                                                                                                                                                                                                                                                                                                                                                                                                                                                                                                                                                                                                                                                                                                                                                                                                                                                                                                                                                                                                                                                                                                                                                                                                                                                                                                                                                                                                                                                                                                                             |                                                                                                                                        |                                                                                                                                        |                                                                                                                                                                                                                                                                                                                                                                                                                                                                                         |
|-----------------------------------------------------------------------------------------------------------------------------------------------------------------------------------------------------------------------------------------------------------------------------------------------------------------------------------------------------------------------------------------------------------------------------------------------------------------------------------------------------------------------------------------------------------------------------------------------------------------------------------------------------------------------------------------------------------------------------------------------------------------------------------------------------------------------------------------------------------------------------------------------------------------------------------------------------------------------------------------------------------------------------------------------------------------------------------------------------------------------------------------------------------------------------------------------------------------------------------------------------------------------------------------------------------------------------------------------------------------------------------------------------------------------------------------------------------------------------------------------------------------------------------------------------------------------------------------------------------------------------------------------------------------------------------------------------------------------------------------------------------------------------------------------------------------------------------------------------------------------------------------------------------------------------------------------------------------------------------------------------------------------------------------------------------------------------------------------------------------------------------------------------------------------------------------------------------------------------------------------------------------------------------------------------------------------------------------------------------------------------------------------------------------------------------------------------------------------------------------------------------------------------------------------------------------------------------------------------------------------------------------------------------------------------------------------------------------------------------------------------------------------------|----------------------------------------------------------------------------------------------------------------------------------------|----------------------------------------------------------------------------------------------------------------------------------------|-----------------------------------------------------------------------------------------------------------------------------------------------------------------------------------------------------------------------------------------------------------------------------------------------------------------------------------------------------------------------------------------------------------------------------------------------------------------------------------------|
| see above                                                                                                                                                                                                                                                                                                                                                                                                                                                                                                                                                                                                                                                                                                                                                                                                                                                                                                                                                                                                                                                                                                                                                                                                                                                                                                                                                                                                                                                                                                                                                                                                                                                                                                                                                                                                                                                                                                                                                                                                                                                                                                                                                                                                                                                                                                                                                                                                                                                                                                                                                                                                                                                                                                                                                                   | Clinical Microbiology Laboratory, Tel Aviv Sourasky Medical Center                                                                     | Clinical Microbiology Laboratory, Tel Aviv Sourasky Medical Center                                                                     | Alan Ziv; Amos Adler; Katya Levytzky; Lior Handler; Ora Halutz                                                                                                                                                                                                                                                                                                                                                                                                                          |
| EPI_ISL_7042161, EPI_ISL_7042168, EPI_ISL_7462220, EPI_ISL_7462233, EPI_ISL_7462310, EPI_ISL_7462311, EPI_ISL_7462312                                                                                                                                                                                                                                                                                                                                                                                                                                                                                                                                                                                                                                                                                                                                                                                                                                                                                                                                                                                                                                                                                                                                                                                                                                                                                                                                                                                                                                                                                                                                                                                                                                                                                                                                                                                                                                                                                                                                                                                                                                                                                                                                                                                                                                                                                                                                                                                                                                                                                                                                                                                                                                                       |                                                                                                                                        |                                                                                                                                        |                                                                                                                                                                                                                                                                                                                                                                                                                                                                                         |
| see above                                                                                                                                                                                                                                                                                                                                                                                                                                                                                                                                                                                                                                                                                                                                                                                                                                                                                                                                                                                                                                                                                                                                                                                                                                                                                                                                                                                                                                                                                                                                                                                                                                                                                                                                                                                                                                                                                                                                                                                                                                                                                                                                                                                                                                                                                                                                                                                                                                                                                                                                                                                                                                                                                                                                                                   | Clinical Virology                                                                                                                      | Clinical Bacteriology, University Hospital Basel                                                                                       | Adrian Egli; Alfredo Mari; Fanny Wegner; Hans Hirsch; Helena MB Seth-Smith; Julia Bielicki; Karoline Leuzinger; Manuel Battegay; Tim Roloff                                                                                                                                                                                                                                                                                                                                             |
| EPI_ISL_7373598                                                                                                                                                                                                                                                                                                                                                                                                                                                                                                                                                                                                                                                                                                                                                                                                                                                                                                                                                                                                                                                                                                                                                                                                                                                                                                                                                                                                                                                                                                                                                                                                                                                                                                                                                                                                                                                                                                                                                                                                                                                                                                                                                                                                                                                                                                                                                                                                                                                                                                                                                                                                                                                                                                                                                             | Clinical Virology, Children's Hospital Los Angeles                                                                                     | Clinical Virology, Children's Hospital Los Angeles                                                                                     | Alexander Judkins; Cheryl Pool; Javier Mestas; Jennifer Dien Bard; John Fissel; Maurice O'Gorman                                                                                                                                                                                                                                                                                                                                                                                        |
| EPI_ISL_7462438                                                                                                                                                                                                                                                                                                                                                                                                                                                                                                                                                                                                                                                                                                                                                                                                                                                                                                                                                                                                                                                                                                                                                                                                                                                                                                                                                                                                                                                                                                                                                                                                                                                                                                                                                                                                                                                                                                                                                                                                                                                                                                                                                                                                                                                                                                                                                                                                                                                                                                                                                                                                                                                                                                                                                             | Cliniques universitaires Saint-Luc                                                                                                     | UCLouvain/REC/MBLG-CTMA                                                                                                                | Benoit Kabamba Mukadi; Bertrand Bearzatto; Jean-Luc Gala; Nicolas Pinte; Paul Blanpain; Simon Ophélie; Valentin Coste                                                                                                                                                                                                                                                                                                                                                                   |
| EPI_ISL_6951145                                                                                                                                                                                                                                                                                                                                                                                                                                                                                                                                                                                                                                                                                                                                                                                                                                                                                                                                                                                                                                                                                                                                                                                                                                                                                                                                                                                                                                                                                                                                                                                                                                                                                                                                                                                                                                                                                                                                                                                                                                                                                                                                                                                                                                                                                                                                                                                                                                                                                                                                                                                                                                                                                                                                                             | Color Genomics                                                                                                                         | Chiu Laboratory, University of California, San Francisco                                                                               | Alicia Sotomayor-Gonzalez; Alicia Zhou; Amy Garlin; Charles Chiu; Darpun Sachdev; Katherine Hernandez; Scott Topper; Susan Philip; Venice Servellita; Yueyuan Zhang                                                                                                                                                                                                                                                                                                                     |
| EPI_ISL_7010485                                                                                                                                                                                                                                                                                                                                                                                                                                                                                                                                                                                                                                                                                                                                                                                                                                                                                                                                                                                                                                                                                                                                                                                                                                                                                                                                                                                                                                                                                                                                                                                                                                                                                                                                                                                                                                                                                                                                                                                                                                                                                                                                                                                                                                                                                                                                                                                                                                                                                                                                                                                                                                                                                                                                                             | Colorado Department of Public Health and Environment                                                                                   | Colorado Department of Public Health and Environment                                                                                   | Alexandria Rossheim; Diana Ir; Emily A. Travanty; Laura Bankers; Mandy Waters; Michael A. Martin; Molly C. Hetherington-Rauth; Sarah Elizabeth Totten; Shannon R. Matzinger                                                                                                                                                                                                                                                                                                             |
| EPI_ISL_7613413                                                                                                                                                                                                                                                                                                                                                                                                                                                                                                                                                                                                                                                                                                                                                                                                                                                                                                                                                                                                                                                                                                                                                                                                                                                                                                                                                                                                                                                                                                                                                                                                                                                                                                                                                                                                                                                                                                                                                                                                                                                                                                                                                                                                                                                                                                                                                                                                                                                                                                                                                                                                                                                                                                                                                             | Community Labs, San Antonio                                                                                                            | STRL UT Health San Antonio, Greehey Children's Cancer Research Institute                                                               | Bethany Landry; Dawn Garcia; Guillermo Nunez; Hongxin Fan; Josefina Stoever; Korri Weldon; Kumari Vadlamudi; Marjorie Parker David; San Antonio Metropolitan Health District; Texas Department of State Health Services; Weijing He; Yidong Chen; Zhao Lai; Zhenqing Ye                                                                                                                                                                                                                 |
| EPI_ISL_7451063, EPI_ISL_7451073, EPI_ISL_7451079, EPI_ISL_7451089                                                                                                                                                                                                                                                                                                                                                                                                                                                                                                                                                                                                                                                                                                                                                                                                                                                                                                                                                                                                                                                                                                                                                                                                                                                                                                                                                                                                                                                                                                                                                                                                                                                                                                                                                                                                                                                                                                                                                                                                                                                                                                                                                                                                                                                                                                                                                                                                                                                                                                                                                                                                                                                                                                          | Cruz Vermelha Portuguesa                                                                                                               | Instituto Nacional de Saude (INSA)                                                                                                     | Borges et al                                                                                                                                                                                                                                                                                                                                                                                                                                                                            |
| EPI_ISL_7609869                                                                                                                                                                                                                                                                                                                                                                                                                                                                                                                                                                                                                                                                                                                                                                                                                                                                                                                                                                                                                                                                                                                                                                                                                                                                                                                                                                                                                                                                                                                                                                                                                                                                                                                                                                                                                                                                                                                                                                                                                                                                                                                                                                                                                                                                                                                                                                                                                                                                                                                                                                                                                                                                                                                                                             | Curative Labs                                                                                                                          | Curative Labs                                                                                                                          | Elias L. Salfati; Eugenia Khorosheva; George Way; J.Cesar Ignacio-Espinoza; Janet Chen; Mikhail Hanewich-Hollatz; Nabjot Sandhu; Sophia Quasem; Vladimir Slepnev; Zhiyi Xie                                                                                                                                                                                                                                                                                                             |
| EPI_ISL_7655648                                                                                                                                                                                                                                                                                                                                                                                                                                                                                                                                                                                                                                                                                                                                                                                                                                                                                                                                                                                                                                                                                                                                                                                                                                                                                                                                                                                                                                                                                                                                                                                                                                                                                                                                                                                                                                                                                                                                                                                                                                                                                                                                                                                                                                                                                                                                                                                                                                                                                                                                                                                                                                                                                                                                                             | DC Public Health Lab/ Dept. of Forensic Sciences                                                                                       | DC Public Health Lab/ Dept. of Forensic Sciences                                                                                       | Brittany Hamilton; Connie Maza; Elizabeth Yelaya; Eric Vaughn; Janis Doss; Jocelyn Hauser; Monica Mann; Nathan Bruns; Sarah Scott; Scott Nguyen; Wadid Bchara                                                                                                                                                                                                                                                                                                                           |
| EPI_ISL_7605689, EPI_ISL_7605739, EPI_ISL_7605775                                                                                                                                                                                                                                                                                                                                                                                                                                                                                                                                                                                                                                                                                                                                                                                                                                                                                                                                                                                                                                                                                                                                                                                                                                                                                                                                                                                                                                                                                                                                                                                                                                                                                                                                                                                                                                                                                                                                                                                                                                                                                                                                                                                                                                                                                                                                                                                                                                                                                                                                                                                                                                                                                                                           | DE AAR LABORATORY                                                                                                                      | National Institute for Communicable Diseases of the National Health Laboratory Service                                                 | Amoako DG; Bhiman JN; Everatt J; Ismail A; Mahlangu B; Mnguni A; Mohale T; Ntuli N; Scheepers C; Wolter N                                                                                                                                                                                                                                                                                                                                                                               |
| EPI_ISL_7062087, EPI_ISL_7063588, EPI_ISL_7272249, EPI_ISL_7514034, EPI_ISL_7514991, EPI_ISL_7515043, EPI_ISL_7515374, EPI_ISL_7516043, EPI_ISL_7517471, EPI_ISL_7517646, EPI_ISL_7518103, EPI_ISL_7518795, EPI_ISL_7520214, EPI_ISL_7520543, EPI_ISL_7520819, EPI_ISL_7523657, EPI_ISL_7525859, EPI_ISL_7526218, EPI_ISL_7528707, EPI_ISL_7529040, EPI_ISL_7529817, EPI_ISL_7530609, EPI_ISL_7532336, EPI_ISL_7532391, EPI_ISL_7533005, EPI_ISL_7534407, EPI_ISL_7534541, EPI_ISL_7596661, EPI_ISL_7596668, EPI_ISL_7596669, EPI_ISL_7596670, EPI_ISL_7596684, EPI_ISL_7596696, EPI_ISL_7596697, EPI_ISL_7596702, EPI_ISL_7599427, EPI_ISL_7599604, EPI_ISL_7599994, EPI_ISL_7600175, EPI_ISL_7600348, EPI_ISL_7600349, EPI_ISL_7600356, EPI_ISL_7600365, EPI_ISL_7600506, EPI_ISL_7600699, EPI_ISL_7600710, EPI_ISL_7600940, EPI_ISL_7600946, EPI_ISL_7601285, EPI_ISL_7601634, EPI_ISL_7601635, EPI_ISL_7601645, EPI_ISL_7601647, EPI_ISL_7601691, EPI_ISL_7602008, EPI_ISL_7602017, EPI_ISL_7602018, EPI_ISL_7602026, EPI_ISL_7602028, EPI_ISL_7602031, EPI_ISL_7602182, EPI_ISL_7602236, EPI_ISL_7602266, EPI_ISL_7602373, EPI_ISL_7602581, EPI_ISL_7602582, EPI_ISL_7602583, EPI_ISL_7602584, EPI_ISL_7602585, EPI_ISL_7602591, EPI_ISL_7602592, EPI_ISL_7602593, EPI_ISL_7602594, EPI_ISL_7602601, EPI_ISL_7602607, EPI_ISL_7602608, EPI_ISL_7602609, EPI_ISL_7602610, EPI_ISL_7602617, EPI_ISL_7602618, EPI_ISL_7602619, EPI_ISL_7602620, EPI_ISL_7602625, EPI_ISL_7602626, EPI_ISL_7602627, EPI_ISL_7602628, EPI_ISL_7602636, EPI_ISL_7602637, EPI_ISL_7602638, EPI_ISL_7602644, EPI_ISL_7602645, EPI_ISL_7602646, EPI_ISL_7602647, EPI_ISL_7602655, EPI_ISL_7602656, EPI_ISL_7602667, EPI_ISL_7602673, EPI_ISL_7602674, EPI_ISL_7602675, EPI_ISL_7602676, EPI_ISL_7602685, EPI_ISL_7602686, EPI_ISL_7602689, EPI_ISL_7602696, EPI_ISL_7638689, EPI_ISL_7638718, EPI_ISL_7639039, EPI_ISL_7639117, EPI_ISL_7639395, EPI_ISL_7640706, EPI_ISL_7640724, EPI_ISL_7640969, EPI_ISL_7641033, EPI_ISL_7642098, EPI_ISL_7642471, EPI_ISL_7642555, EPI_ISL_7642579, EPI_ISL_7642615, EPI_ISL_7642958, EPI_ISL_7643084, EPI_ISL_7643799, EPI_ISL_7644130, EPI_ISL_7644179, EPI_ISL_7644186, EPI_ISL_7644799, EPI_ISL_7644806, EPI_ISL_7644811, EPI_ISL_7644892, EPI_ISL_7645092, EPI_ISL_7645159, EPI_ISL_7645256, EPI_ISL_7645265, EPI_ISL_7645273, EPI_ISL_7648027, EPI_ISL_7648227, EPI_ISL_7648272, EPI_ISL_7648309, EPI_ISL_7648310, EPI_ISL_7648328, EPI_ISL_7648332, EPI_ISL_7648333, EPI_ISL_7648334, EPI_ISL_7648345, EPI_ISL_7648346, EPI_ISL_7648353, EPI_ISL_7648354, EPI_ISL_7648355, EPI_ISL_7648357, EPI_ISL_7648359, EPI_ISL_7648360, EPI_ISL_7648361, EPI_ISL_7648362, EPI_ISL_7648363, EPI_ISL_7648366, EPI_ISL_7648367, EPI_ISL_7648368, EPI_ISL_7648369 | Danish Covid-19 Genome Consortium                                                                                                      |                                                                                                                                        |                                                                                                                                                                                                                                                                                                                                                                                                                                                                                         |
| see above                                                                                                                                                                                                                                                                                                                                                                                                                                                                                                                                                                                                                                                                                                                                                                                                                                                                                                                                                                                                                                                                                                                                                                                                                                                                                                                                                                                                                                                                                                                                                                                                                                                                                                                                                                                                                                                                                                                                                                                                                                                                                                                                                                                                                                                                                                                                                                                                                                                                                                                                                                                                                                                                                                                                                                   | Department of Bacteria, Parasites and Fungi, Statens Serum Institut, Copenhagen, Denmark                                               | Statens Serum Institut Bioinformatics and Microbial Genomics                                                                           | Danish Covid-19 Genome Consortium                                                                                                                                                                                                                                                                                                                                                                                                                                                       |
| EPI_ISL_7042669                                                                                                                                                                                                                                                                                                                                                                                                                                                                                                                                                                                                                                                                                                                                                                                                                                                                                                                                                                                                                                                                                                                                                                                                                                                                                                                                                                                                                                                                                                                                                                                                                                                                                                                                                                                                                                                                                                                                                                                                                                                                                                                                                                                                                                                                                                                                                                                                                                                                                                                                                                                                                                                                                                                                                             | Department of Clinical Microbiology                                                                                                    | GIGA Medical Genomics                                                                                                                  | Bouchra Boujemla; Claire Gourzonès; Cécile Meex; Keith Durkin; Laurent Gillet; Maria Artesi; Marie-Pierre Hayette; Nadine Cambisano; Nathalie Renotte; Olivier Ek; Sébastien Bontems; Vincent Bours                                                                                                                                                                                                                                                                                     |
| EPI_ISL_7512899, EPI_ISL_7520649, EPI_ISL_7531709, EPI_ISL_7533537, EPI_ISL_7533749                                                                                                                                                                                                                                                                                                                                                                                                                                                                                                                                                                                                                                                                                                                                                                                                                                                                                                                                                                                                                                                                                                                                                                                                                                                                                                                                                                                                                                                                                                                                                                                                                                                                                                                                                                                                                                                                                                                                                                                                                                                                                                                                                                                                                                                                                                                                                                                                                                                                                                                                                                                                                                                                                         | Department of Clinical Microbiology, Odense University Hospital, Odense, Denmark                                                       | Statens Serum Institut Bioinformatics and Microbial Genomics                                                                           | Danish Covid-19 Genome Consortium                                                                                                                                                                                                                                                                                                                                                                                                                                                       |
| EPI_ISL_7192723, EPI_ISL_7192733, EPI_ISL_7192734, EPI_ISL_7485700                                                                                                                                                                                                                                                                                                                                                                                                                                                                                                                                                                                                                                                                                                                                                                                                                                                                                                                                                                                                                                                                                                                                                                                                                                                                                                                                                                                                                                                                                                                                                                                                                                                                                                                                                                                                                                                                                                                                                                                                                                                                                                                                                                                                                                                                                                                                                                                                                                                                                                                                                                                                                                                                                                          | Department of Health Technology and Informatics, The Hong Kong Polytechnic University                                                  | Department of Health Technology and Informatics, The Hong Kong Polytechnic University                                                  | Alan Ka-Lun Wu; Alex Yat-Man Ho; Barry Kin-Chung Wong; Chloe Toi-Mei Chan; David Ho-Keung Shum; Denise Sze-Hang Wong; Gilman Kit-Hang Siu; Hiu-Yin Lao; Hoi-Ching Jim; Ivan Tak-Fai Wong; Jake Siu-Lun Leung; Kam-Tong Yip; Kenneth Siu-Sing Leung; Kingsley King-Gee Tam; Kitty Sau-Chun Fung; Kristine Luk; Lam-Kwong Lee; Miranda Chong-Yee Yau; Sandy Ka-Yee Chau; Shea Ping Yip; Tak-Lun Que; Timothy Ting-Leung Ng; Wing Cheong Yam; Wing-Hei Lo; Wing-Kin To; Yvette Wai-Man Lai |
| EPI_ISL_6841980, EPI_ISL_6841981, EPI_ISL_7138045, EPI_ISL_7357684, EPI_ISL_7385702                                                                                                                                                                                                                                                                                                                                                                                                                                                                                                                                                                                                                                                                                                                                                                                                                                                                                                                                                                                                                                                                                                                                                                                                                                                                                                                                                                                                                                                                                                                                                                                                                                                                                                                                                                                                                                                                                                                                                                                                                                                                                                                                                                                                                                                                                                                                                                                                                                                                                                                                                                                                                                                                                         | Department of Microbiology, The University of Hong Kong                                                                                | Department of Microbiology, The University of Hong Kong                                                                                | Kelvin K.W. To; Kwok-Yung Yuen                                                                                                                                                                                                                                                                                                                                                                                                                                                          |
| EPI_ISL_7571413                                                                                                                                                                                                                                                                                                                                                                                                                                                                                                                                                                                                                                                                                                                                                                                                                                                                                                                                                                                                                                                                                                                                                                                                                                                                                                                                                                                                                                                                                                                                                                                                                                                                                                                                                                                                                                                                                                                                                                                                                                                                                                                                                                                                                                                                                                                                                                                                                                                                                                                                                                                                                                                                                                                                                             | Department of Pathology and Laboratory Medicine, AKUH Laboratories, Karachi, Pakistan                                                  | Department of Virology                                                                                                                 | A. Kanji; A. Nasir; A. Samreen; A.R. Bukhari; Aamer Ikram; Abdul Ahad; J. Ashraf; Massab Umair; Muhammad Ammar; Muhammad Salman; Nazish Badar; Qasim Ali; R. Hasan; Syed Adnan Haider; U.B. Amir; Z. Hasan; Zaira Rehman                                                                                                                                                                                                                                                                |
| EPI_ISL_7201444, EPI_ISL_7624156, EPI_ISL_7624213                                                                                                                                                                                                                                                                                                                                                                                                                                                                                                                                                                                                                                                                                                                                                                                                                                                                                                                                                                                                                                                                                                                                                                                                                                                                                                                                                                                                                                                                                                                                                                                                                                                                                                                                                                                                                                                                                                                                                                                                                                                                                                                                                                                                                                                                                                                                                                                                                                                                                                                                                                                                                                                                                                                           | Department of Virology and Immunology, University of Helsinki and Helsinki University Hospital, HUSLAB Finland                         | Department of Virology, Faculty of Medicine, University of Helsinki, Helsinki, Finland                                                 | Hanna Jarva; Hanna Liimatainen; Hanna Vauhkonen; Hussein Alburkat; Maija Lappalainen; Mert Erdin; Olli Vapalahti; Phuoc Truong; Ravi Kant; Sari Hannula; Satu Kurkela; Teemu Smura                                                                                                                                                                                                                                                                                                      |
| EPI_ISL_6972689, EPI_ISL_7464539, EPI_ISL_7464543                                                                                                                                                                                                                                                                                                                                                                                                                                                                                                                                                                                                                                                                                                                                                                                                                                                                                                                                                                                                                                                                                                                                                                                                                                                                                                                                                                                                                                                                                                                                                                                                                                                                                                                                                                                                                                                                                                                                                                                                                                                                                                                                                                                                                                                                                                                                                                                                                                                                                                                                                                                                                                                                                                                           | Dept. of Laboratory Medicine<br>Dept. of Microbiology and Infection Control, Akershus University Hospital HF                           | Dept. of Laboratory Medicine<br>Dept. of Microbiology and Infection Control, Akershus University Hospital HF                           | Claudia Weber; Fabian Konig; Harald Esterbauer; Oswald Wagner; Robert Strassi; Sabina Plumer; Victoria Six<br>Alexander Hesselberg Lovestad; Hege Vangstein Aamot                                                                                                                                                                                                                                                                                                                       |
| EPI_ISL_6959926, EPI_ISL_6959935, EPI_ISL_6959993, EPI_ISL_7406117, EPI_ISL_7406118, EPI_ISL_7406119, EPI_ISL_7406124, EPI_ISL_7406125, EPI_ISL_7406126                                                                                                                                                                                                                                                                                                                                                                                                                                                                                                                                                                                                                                                                                                                                                                                                                                                                                                                                                                                                                                                                                                                                                                                                                                                                                                                                                                                                                                                                                                                                                                                                                                                                                                                                                                                                                                                                                                                                                                                                                                                                                                                                                                                                                                                                                                                                                                                                                                                                                                                                                                                                                     | Division of Emerging Infectious Diseases, Bureau of Infectious Diseases Diagnosis Control, Korea Disease Control and Prevention Agency | Division of Emerging Infectious Diseases, Bureau of Infectious Diseases Diagnosis Control, Korea Disease Control and Prevention Agency | Ae Kyung Park; Chae Young Lee; Eun-Jin Kim; Heui Man Kim; Hyuck Jin Lee; Il-Hwan Kim; Jeong-Ah Kim; Jeong-Min Kim                                                                                                                                                                                                                                                                                                                                                                       |
| see above                                                                                                                                                                                                                                                                                                                                                                                                                                                                                                                                                                                                                                                                                                                                                                                                                                                                                                                                                                                                                                                                                                                                                                                                                                                                                                                                                                                                                                                                                                                                                                                                                                                                                                                                                                                                                                                                                                                                                                                                                                                                                                                                                                                                                                                                                                                                                                                                                                                                                                                                                                                                                                                                                                                                                                   | Division of Medical Virology, National Health Laboratory Service (NHLS), Tygerberg Hospital / Stellenbosch University                  | Division of Medical Virology, National Health Laboratory Service (NHLS), Tygerberg Hospital / Stellenbosch University                  | Gert van Zyl; Kamela Mahlakwane; Shannon Wilson; Susan Engelbrecht; Tania Stander; Tongai Maponga; Wolfgang Preiser                                                                                                                                                                                                                                                                                                                                                                     |
| EPI_ISL_7062590, EPI_ISL_7506397, EPI_ISL_7506422, EPI_ISL_7506490                                                                                                                                                                                                                                                                                                                                                                                                                                                                                                                                                                                                                                                                                                                                                                                                                                                                                                                                                                                                                                                                                                                                                                                                                                                                                                                                                                                                                                                                                                                                                                                                                                                                                                                                                                                                                                                                                                                                                                                                                                                                                                                                                                                                                                                                                                                                                                                                                                                                                                                                                                                                                                                                                                          | Dr. Risch Ostschweiz AG                                                                                                                | Dr Risch Laboratory                                                                                                                    | Dominique Fabien Hilti; Faina Wehrli; Lorenz Risch; Martin Risch; Nadia Wohlwend; Sinem Kas; Thomas Bodmer                                                                                                                                                                                                                                                                                                                                                                              |
| EPI_ISL_7651134, EPI_ISL_7469070                                                                                                                                                                                                                                                                                                                                                                                                                                                                                                                                                                                                                                                                                                                                                                                                                                                                                                                                                                                                                                                                                                                                                                                                                                                                                                                                                                                                                                                                                                                                                                                                                                                                                                                                                                                                                                                                                                                                                                                                                                                                                                                                                                                                                                                                                                                                                                                                                                                                                                                                                                                                                                                                                                                                            | Dutch COVID-19 response team<br>Dutch COVID-19 response team                                                                           | Erasmus Medical Center<br>Medical Microbiology, Maastricht University Medical Center                                                   | Anne van der Linden; Annetiek van der Eijk; Bas Oude Munnink; Corine GeurtsvanKessel; David Nieuwenhuijse; Emmanuelle Munger; Irina Chestakova; Marion Koopmans; Marjan Boter; Reina Sikkema; Richard Molenkamp; on behalf of the Dutch national COVID-19 response team.<br>Brian van der Veer*; Carmen Reumkens; Christian Hoebe; Erik Beuken; Jozef Dingemans*; Lieke van Alphen; Paul Savelkoul                                                                                      |
| EPI_ISL_6841607, EPI_ISL_6841608, EPI_ISL_6841609, EPI_ISL_6841610, EPI_ISL_6841611, EPI_ISL_6841612, EPI_ISL_6841613, EPI_ISL_6841614, EPI_ISL_6841615, EPI_ISL_6841616, EPI_ISL_6841617, EPI_ISL_6841618, EPI_ISL_6841619, EPI_ISL_7470657, EPI_ISL_7471412, EPI_ISL_7471413, EPI_ISL_7471451, EPI_ISL_7471520, EPI_ISL_7471548, EPI_ISL_7471549, EPI_ISL_7471975                                                                                                                                                                                                                                                                                                                                                                                                                                                                                                                                                                                                                                                                                                                                                                                                                                                                                                                                                                                                                                                                                                                                                                                                                                                                                                                                                                                                                                                                                                                                                                                                                                                                                                                                                                                                                                                                                                                                                                                                                                                                                                                                                                                                                                                                                                                                                                                                         | Dutch COVID-19 response team                                                                                                           | National Institute for Public Health and the Environment (RIVM)                                                                        | Adam Meijer; AnneMarie van den Brandt; Annelies Kroneman; Bas van der Veer; Chantal Reusken; Dennis Schmitz; Dirk Eggink; Florian Zwagemaker; Harry Venema; Ivo van Walle; Jeroen Cremer; Jil Kocken; Karim Hajji; Kim Freniks; Linda van Someren; Lisa Wljsman; Lynn Aarts; Rianne Jaarsma; Sanne Bos; Sharon van den Brink; Stijn van Rossum; on behalf of the national COVID-19 response team                                                                                        |
| see above                                                                                                                                                                                                                                                                                                                                                                                                                                                                                                                                                                                                                                                                                                                                                                                                                                                                                                                                                                                                                                                                                                                                                                                                                                                                                                                                                                                                                                                                                                                                                                                                                                                                                                                                                                                                                                                                                                                                                                                                                                                                                                                                                                                                                                                                                                                                                                                                                                                                                                                                                                                                                                                                                                                                                                   | Dynacare                                                                                                                               | National Microbiology Laboratory (NML)                                                                                                 | Anna Majer; Anneliese Landgraff; CanCOGeN's metadata curation team; Darian Hole; Dynacare Brampton COVID-19 Diagnostic team; Elsie Grudski; Gary Van Domselaar; Gordon Jolly; Grace Seo; Jennifer Tanner; Madison Chapel; Morag Graham; Natalie Knox; Nathalie Bastien; Philip Mabon; Public Health Agency of Canada CanCOGeN team; Rhiannon Huzarewicz; Russell Mandes; Shari Tyson; Timothy Booth; Yan Li                                                                             |
| EPI_ISL_6826713, EPI_ISL_6826714, EPI_ISL_6989667, EPI_ISL_7015154, EPI_ISL_7160041, EPI_ISL_7160042                                                                                                                                                                                                                                                                                                                                                                                                                                                                                                                                                                                                                                                                                                                                                                                                                                                                                                                                                                                                                                                                                                                                                                                                                                                                                                                                                                                                                                                                                                                                                                                                                                                                                                                                                                                                                                                                                                                                                                                                                                                                                                                                                                                                                                                                                                                                                                                                                                                                                                                                                                                                                                                                        |                                                                                                                                        |                                                                                                                                        |                                                                                                                                                                                                                                                                                                                                                                                                                                                                                         |
| EPI_ISL_7657584, EPI_ISL_7657586, EPI_ISL_7657588                                                                                                                                                                                                                                                                                                                                                                                                                                                                                                                                                                                                                                                                                                                                                                                                                                                                                                                                                                                                                                                                                                                                                                                                                                                                                                                                                                                                                                                                                                                                                                                                                                                                                                                                                                                                                                                                                                                                                                                                                                                                                                                                                                                                                                                                                                                                                                                                                                                                                                                                                                                                                                                                                                                           | EXCITE lab                                                                                                                             | Andersen lab at Scripps Research                                                                                                       | Abigail Schnapper; Angela Scioscia; Cheryl Anderson; Chip Schooley; Greg Humphrey; Helena Tubb; Natasha Martin; Sawyer Farmer; Smruthi Karthikeyan; Tommy Valles + SEARCH                                                                                                                                                                                                                                                                                                               |
| EPI_ISL_6949582, EPI_ISL_7123666, EPI_ISL_7123680, EPI_ISL_7123692, EPI_ISL_7330020, EPI_ISL_7330021, EPI_ISL_7330161, EPI_ISL_7464335, EPI_ISL_7464340, EPI_ISL_7464346, EPI_ISL_7660998, EPI_ISL_7660999                                                                                                                                                                                                                                                                                                                                                                                                                                                                                                                                                                                                                                                                                                                                                                                                                                                                                                                                                                                                                                                                                                                                                                                                                                                                                                                                                                                                                                                                                                                                                                                                                                                                                                                                                                                                                                                                                                                                                                                                                                                                                                                                                                                                                                                                                                                                                                                                                                                                                                                                                                  |                                                                                                                                        |                                                                                                                                        |                                                                                                                                                                                                                                                                                                                                                                                                                                                                                         |
| see above                                                                                                                                                                                                                                                                                                                                                                                                                                                                                                                                                                                                                                                                                                                                                                                                                                                                                                                                                                                                                                                                                                                                                                                                                                                                                                                                                                                                                                                                                                                                                                                                                                                                                                                                                                                                                                                                                                                                                                                                                                                                                                                                                                                                                                                                                                                                                                                                                                                                                                                                                                                                                                                                                                                                                                   | Edmonton Provincial Lab                                                                                                                | Alberta Precision Labs (APL)                                                                                                           | Buss; Croxen M; Deo A; Dieu P; E; Ferrato C; Gill K; Khan F; Koleva P; Li V; Lloyd C; Lynch T; Ma R; Murphy S; Pabbaraju K; Shokoples S; Thayer J; Tipples G; Whitehouse M; Wong A; Yu C; Zelyas N                                                                                                                                                                                                                                                                                      |
| EPI_ISL_7547732                                                                                                                                                                                                                                                                                                                                                                                                                                                                                                                                                                                                                                                                                                                                                                                                                                                                                                                                                                                                                                                                                                                                                                                                                                                                                                                                                                                                                                                                                                                                                                                                                                                                                                                                                                                                                                                                                                                                                                                                                                                                                                                                                                                                                                                                                                                                                                                                                                                                                                                                                                                                                                                                                                                                                             | Everight diagnostics (Abuja)                                                                                                           | National Reference Laboratory, Nigeria                                                                                                 | Catherine Okoi; Chimaobi Chukwu; Dr Ifedayo Adetifa; Dr Nddo Nnaemeka; Dr Omoare Adesuyi; Nwando Mba; Olajumoke Babatunde; Oluosola Anuoluwapo Akabi; Oyeronke Ayansola                                                                                                                                                                                                                                                                                                                 |

|                                                                                                                                                                                                                                                                                                                                                                                                                                                          |                                                                         |                                                                                                                                            |                                                                                                                                                                                                                                                                                                                                                                                                                                                                                                                                     |
|----------------------------------------------------------------------------------------------------------------------------------------------------------------------------------------------------------------------------------------------------------------------------------------------------------------------------------------------------------------------------------------------------------------------------------------------------------|-------------------------------------------------------------------------|--------------------------------------------------------------------------------------------------------------------------------------------|-------------------------------------------------------------------------------------------------------------------------------------------------------------------------------------------------------------------------------------------------------------------------------------------------------------------------------------------------------------------------------------------------------------------------------------------------------------------------------------------------------------------------------------|
| EPI_ISL_7547733                                                                                                                                                                                                                                                                                                                                                                                                                                          |                                                                         | Centre for Disease Control                                                                                                                 |                                                                                                                                                                                                                                                                                                                                                                                                                                                                                                                                     |
| EPI_ISL_7313687                                                                                                                                                                                                                                                                                                                                                                                                                                          | Florida Bureau of Public Health Laboratories                            | Florida Bureau of Public Health Laboratories                                                                                               | Jason Blanton; Namratha Tarigopula; Sarah Schmedes; Tiffany Splatt                                                                                                                                                                                                                                                                                                                                                                                                                                                                  |
| EPI_ISL_7154399, EPI_ISL_7497709, EPI_ISL_7497711, EPI_ISL_7497739, EPI_ISL_7497740, EPI_ISL_7497741, EPI_ISL_7497742, EPI_ISL_7497767                                                                                                                                                                                                                                                                                                                   | see above                                                               | Fulgent Genetics                                                                                                                           | Centers for Disease Control and Prevention Division of Viral Diseases, Pathogen Discovery                                                                                                                                                                                                                                                                                                                                                                                                                                           |
| EPI_ISL_6971572, EPI_ISL_6989155, EPI_ISL_7248772, EPI_ISL_7248778, EPI_ISL_7248797, EPI_ISL_7248805, EPI_ISL_7248814, EPI_ISL_7248821, EPI_ISL_7470261                                                                                                                                                                                                                                                                                                  | see above                                                               | Furst Medical Laboratory                                                                                                                   | Norwegian Institute of Public Health, Department of Virology                                                                                                                                                                                                                                                                                                                                                                                                                                                                        |
| EPI_ISL_7473158                                                                                                                                                                                                                                                                                                                                                                                                                                          | GA Department of Public Health                                          | GA Department of Public Health                                                                                                             | Aliyah Fields; Jonathan Edwards; Sharmila Talekar; Stacy Reeves; Taylor Smith; Tonia Parrott                                                                                                                                                                                                                                                                                                                                                                                                                                        |
| EPI_ISL_7173962                                                                                                                                                                                                                                                                                                                                                                                                                                          | GENEPATH                                                                | NCL, Pune                                                                                                                                  | Ajinkya Khilari; Anu Raghunathan; Bhagyashree Litkar; Dhanasekaran Shanmugam; Divya Niveditha; Jugal Kanekar; Shikha Takur                                                                                                                                                                                                                                                                                                                                                                                                          |
| EPI_ISL_7313494, EPI_ISL_7478195, EPI_ISL_7478220, EPI_ISL_7478233, EPI_ISL_7657471, EPI_ISL_7657493                                                                                                                                                                                                                                                                                                                                                     | GH A.CHENEVIER-H.MONDOR                                                 | Department of Virology, Henri Mondor University Hospital, Assistance Publique Hôpitaux de Paris, Université Paris-Est Créteil, INSERM U955 | Alexandre Soulier; Christophe Rodriguez; Elisabeth Trawinski; Guillaume Gricourt; Jean-Michel Pawlowsky; Melissa N'Debi; Slim Fourati; Vanessa Demontant                                                                                                                                                                                                                                                                                                                                                                            |
| EPI_ISL_6892613, EPI_ISL_6892620, EPI_ISL_6892631, EPI_ISL_6892639, EPI_ISL_6892644, EPI_ISL_6892650, EPI_ISL_6892653, EPI_ISL_6892659, EPI_ISL_6892661, EPI_ISL_6892665, EPI_ISL_6892674, EPI_ISL_6892683, EPI_ISL_6892693                                                                                                                                                                                                                              | see above                                                               | Germano de Sousa                                                                                                                           | Instituto Nacional de Saude (INSA)                                                                                                                                                                                                                                                                                                                                                                                                                                                                                                  |
| EPI_ISL_7545349, EPI_ISL_7545360, EPI_ISL_7545585, EPI_ISL_7596392, EPI_ISL_7596401, EPI_ISL_7596417, EPI_ISL_7649865, EPI_ISL_7649923, EPI_ISL_7660709, EPI_ISL_7660731, EPI_ISL_7660740                                                                                                                                                                                                                                                                | see above                                                               | Gibraltar Health Authority Lab                                                                                                             | Gibraltar Health Authority Covid-19 Laboratory                                                                                                                                                                                                                                                                                                                                                                                                                                                                                      |
| EPI_ISL_7549110, EPI_ISL_7549111                                                                                                                                                                                                                                                                                                                                                                                                                         | Gravity Diagnostics, LLC                                                | Gravity Diagnostics, LLC                                                                                                                   | Borges et al                                                                                                                                                                                                                                                                                                                                                                                                                                                                                                                        |
| EPI_ISL_7544692                                                                                                                                                                                                                                                                                                                                                                                                                                          | Great Brak River Clinic wc GBC                                          | NHLS/UCT                                                                                                                                   | Arash Iranzadeh; Bruna Galvao; Carolyn Williamson; Deelan Doolabh; Diana Hardie; Gert Marais; Innocent Mudau; Luicer Olubayo; Lynn Tyers; Marvin Hsiao; Nokuzola Mbhele; Rageema Joseph; Stephen Korsman                                                                                                                                                                                                                                                                                                                            |
| EPI_ISL_7543874, EPI_ISL_7544059, EPI_ISL_7544158, EPI_ISL_7544262, EPI_ISL_7544652                                                                                                                                                                                                                                                                                                                                                                      | Groote Schuur Hospital wc GSH                                           | NHLS/UCT                                                                                                                                   | Arash Iranzadeh; Bruna Galvao; Carolyn Williamson; Deelan Doolabh; Diana Hardie; Gert Marais; Innocent Mudau; Luicer Olubayo; Lynn Tyers; Marvin Hsiao; Nokuzola Mbhele; Rageema Joseph; Stephen Korsman                                                                                                                                                                                                                                                                                                                            |
| EPI_ISL_6913917                                                                                                                                                                                                                                                                                                                                                                                                                                          | Grupo CR Diagnosticos                                                   | Instituto Adolfo Lutz Strategic Laboratory                                                                                                 | Claudio Tavares Sacchi; Karoline Rodrigues Campos                                                                                                                                                                                                                                                                                                                                                                                                                                                                                   |
| EPI_ISL_6900139, EPI_ISL_6900141, EPI_ISL_6900142, EPI_ISL_6900143                                                                                                                                                                                                                                                                                                                                                                                       | HELEN JOSEPH LABORATORY                                                 | National Institute for Communicable Diseases of the National Health Laboratory Service                                                     | Amoako DG; Bhiman JN; Everatt J; Ismail A; Mahlangu B; Mnguni A; Mohale T; Ntuli N; Scheepers C                                                                                                                                                                                                                                                                                                                                                                                                                                     |
| EPI_ISL_6698790                                                                                                                                                                                                                                                                                                                                                                                                                                          | HOME QUARANTINE TASKFORCE                                               | Hong Kong Department of Health                                                                                                             | Alan K.L. Tsang; Edman T.K. Lam; Ken H.L. Ng; Peter C.W. Yip; Rickjason C.W. Chan                                                                                                                                                                                                                                                                                                                                                                                                                                                   |
| EPI_ISL_7610402                                                                                                                                                                                                                                                                                                                                                                                                                                          | HOPITAL SAINT ANDRE                                                     | CNR Virus des Infections Respiratoires - France SUD                                                                                        | Antonin Bal; Bruno Lina; Bruno Simon; Gregory Destras; Gwendolyne Burfin; Hadrien Regue; Laurence Josset; Martine Valette; Quentin Semans                                                                                                                                                                                                                                                                                                                                                                                           |
| EPI_ISL_7649952                                                                                                                                                                                                                                                                                                                                                                                                                                          | HOSPITAL MUNICIPAL DR JOSE DE CARVALHO FLORENCE                         | Instituto Butantan                                                                                                                         | Antonio Jorge Martins; Claudia Renata dos Santos Barros; David Schlesinger; Debora Botequiao Moretti; Dimas Tadeu Covas; Elaine Cristina Marqueze; Elaine Vieira Santos; Evandra Strazza Rodrigues; Heidge Fukumasu; Jayme Augusto de Souza-Neto; Luiz Alcantara; Luiz Lehmann Coutinho; Maria Carolina Elias; Maurício Lacerda Nogueira; Rafael dos Santos Bezerra; Raul Machado Neto; Rejane Maria Tommasini Grotto; Ricardo Haddad; Sandra Coccuzzo Sampaio Vessoni; Simone Kashima; Svetoslav Nanev Slavov; Vincent Louis Viala |
| EPI_ISL_7045214, EPI_ISL_7571637, EPI_ISL_7571638                                                                                                                                                                                                                                                                                                                                                                                                        | HOSPITAL UNIVERSITARI DE BELLVITGE                                      | Microbiology Department                                                                                                                    | Aida Gonzalez-Diaz; Anna Carrera-Salinas Yolanda Hernandez; Carmen Ardanuy; Daniel Rodriguez; Jordi Camara; Jordi Niubó; Laura Calatayud; M Angeles Dominguez; Sara Marti; Veronica Saez; Yolanda Hernandez                                                                                                                                                                                                                                                                                                                         |
| EPI_ISL_7624161, EPI_ISL_7624188, EPI_ISL_7624204, EPI_ISL_7624230                                                                                                                                                                                                                                                                                                                                                                                       | HOSPITAL UNIVERSITARIO SON ESPASES                                      | HOSPITAL UNIVERSITARIO SON ESPASES                                                                                                         | Dr. Antonio Oliver; Dr. Carla López-Causapé; Dr. Gabriel Cabot; Hospital Universitario Son Espases; on behalf of Servicio de Microbiología                                                                                                                                                                                                                                                                                                                                                                                          |
| EPI_ISL_7565186, EPI_ISL_7565187                                                                                                                                                                                                                                                                                                                                                                                                                         | Harvard University                                                      | Infectious Disease Program, Broad Institute of Harvard and MIT                                                                             | B.L.; D.J.; Dobbins, S.; K.J.; MacInnis; P.C.; Park; Petros, B.; Sabeti; Siddle; Slack, S.; Springer, M.; Welch, N.                                                                                                                                                                                                                                                                                                                                                                                                                 |
| EPI_ISL_7470201                                                                                                                                                                                                                                                                                                                                                                                                                                          | Haukeland University Hospital, Dept. of Microbiology                    | Norwegian Institute of Public Health, Department of Virology                                                                               | Atiya R Ali; Debech Nadia; Engebretsen Serina Beate; Garcia Llorente Ignacio; Hilde Elshaug; Hilde Vollan; Jon Bråte; Kamilla Heddeland Instefjord; Karoline Bragstad; Kathrine Stene-Johansen; Line Victoria Moen; Marie Paulsen Madsen; Olav Hungnes; Pedersen Benedikte Nevjen; Rasmus Riis Kopperud                                                                                                                                                                                                                             |
| EPI_ISL_7142185, EPI_ISL_7142260, EPI_ISL_7184579                                                                                                                                                                                                                                                                                                                                                                                                        | Health Services Laboratories                                            | Wellcome Sanger Institute for the COVID-19 Genomics UK (COG-UK) Consortium                                                                 | Cordelia Langford; David K. Jackson; Dominic Kwiatkowski; Ewan Harrison; Health Services Laboratories and Alex Alderton; Ian Johnston; Jeffrey Barrett; John Sillitoe on behalf of the Wellcome Sanger Institute COVID-19 Surveillance Team; Roberto Amato; Sonia Goncalves                                                                                                                                                                                                                                                         |
| EPI_ISL_7544466                                                                                                                                                                                                                                                                                                                                                                                                                                          | Helderberg Hospital wc HHH                                              | NHLS/UCT                                                                                                                                   | Arash Iranzadeh; Bruna Galvao; Carolyn Williamson; Deelan Doolabh; Diana Hardie; Gert Marais; Innocent Mudau; Luicer Olubayo; Lynn Tyers; Marvin Hsiao; Nokuzola Mbhele; Rageema Joseph; Stephen Korsman                                                                                                                                                                                                                                                                                                                            |
| EPI_ISL_7337440, EPI_ISL_7337441, EPI_ISL_7337442, EPI_ISL_7337443, EPI_ISL_7337444, EPI_ISL_7337445, EPI_ISL_7337446, EPI_ISL_7337447, EPI_ISL_7337448, EPI_ISL_7337449, EPI_ISL_7337450, EPI_ISL_7337451, EPI_ISL_7337452, EPI_ISL_7337453, EPI_ISL_7337454, EPI_ISL_7337455, EPI_ISL_7337458, EPI_ISL_7337460, EPI_ISL_7337461, EPI_ISL_7337462                                                                                                       | see above                                                               | Helen Joseph Laboratory                                                                                                                    | National Institute for Communicable Diseases of the National Health Laboratory Service                                                                                                                                                                                                                                                                                                                                                                                                                                              |
| EPI_ISL_7497723                                                                                                                                                                                                                                                                                                                                                                                                                                          | Helix                                                                   | Centers for Disease Control and Prevention Division of Viral Diseases, Pathogen Discovery                                                  | Benjamin Rambo-Martin; Christopher Gulvick; Clinton Paden; Dakota Howard; Dhvani Batra; Duncan MacCannell; Erisa Sula; Helix CA; Jason Caravas; Kristine Lacek; Matthew Schmeer; Peter Cook; Scott Sammons; Shatavia Morrison; Tymeckia Kendall; Victoria Caban Figueroa; Yvette Unoarumhi                                                                                                                                                                                                                                          |
| EPI_ISL_7265236, EPI_ISL_7265237, EPI_ISL_7462215, EPI_ISL_7620968, EPI_ISL_7620969, EPI_ISL_7620970, EPI_ISL_7620971, EPI_ISL_7620972, EPI_ISL_7620973, EPI_ISL_7620977, EPI_ISL_7621010, EPI_ISL_7621011, EPI_ISL_7621210, EPI_ISL_7621349, EPI_ISL_7621350, EPI_ISL_7621351, EPI_ISL_7621352, EPI_ISL_7621353, EPI_ISL_7621907, EPI_ISL_7621908, EPI_ISL_7621909, EPI_ISL_7621910, EPI_ISL_7621914, EPI_ISL_7621915, EPI_ISL_7621916, EPI_ISL_7621917 | see above                                                               | Histopath                                                                                                                                  | NSW Health Pathology - Institute of Clinical Pathology and Medical Research; Westmead Hospital; University of Sydney                                                                                                                                                                                                                                                                                                                                                                                                                |
| EPI_ISL_6590782, EPI_ISL_6832108                                                                                                                                                                                                                                                                                                                                                                                                                         | Home Quarantine Taskforce                                               | Hong Kong Department of Health                                                                                                             | Alan K.L. Tsang; Edman T.K. Lam; Ken H.L. Ng; Peter C.W. Yip; Rickjason C.W. Chan                                                                                                                                                                                                                                                                                                                                                                                                                                                   |
| EPI_ISL_6716890, EPI_ISL_6716902                                                                                                                                                                                                                                                                                                                                                                                                                         | Hong Kong Department of Health                                          | School of Public Health, The University of Hong Kong                                                                                       | Dominic N.C. Tsang; Haoguo Gu; Leo L.M. Poon; Malik Peiris                                                                                                                                                                                                                                                                                                                                                                                                                                                                          |
| EPI_ISL_7373061, EPI_ISL_7373165, EPI_ISL_7373230                                                                                                                                                                                                                                                                                                                                                                                                        | Hospital General Universitario Albacete                                 | Hospital General Universitario Albacete                                                                                                    | Caridad Sainz de Baranda Camino; Lorena Robles-Fonseca                                                                                                                                                                                                                                                                                                                                                                                                                                                                              |
| EPI_ISL_6851526, EPI_ISL_6902675, EPI_ISL_6971860, EPI_ISL_7042252, EPI_ISL_7604642, EPI_ISL_7604643, EPI_ISL_7604644, EPI_ISL_7604645, EPI_ISL_7604646, EPI_ISL_7604647, EPI_ISL_7604648, EPI_ISL_7604649, EPI_ISL_7604652, EPI_ISL_7604653, EPI_ISL_7604654, EPI_ISL_7604659, EPI_ISL_7604693, EPI_ISL_7604694, EPI_ISL_7604695, EPI_ISL_7604696, EPI_ISL_7604715                                                                                      | see above                                                               | Hospital General Universitario Gregorio Marañón                                                                                            | Hospital General Universitario Gregorio Marañón                                                                                                                                                                                                                                                                                                                                                                                                                                                                                     |
| EPI_ISL_7571377, EPI_ISL_7571378, EPI_ISL_7571388, EPI_ISL_7571389                                                                                                                                                                                                                                                                                                                                                                                       | Hospital General Universitario de Ciudad Real                           | Hospital General Universitario de Ciudad Real                                                                                              | Cristina Colmenarejo; José Martínez-Alorcón; Lidia García-Agudo; Marta Torres-Narbona; Soledad Illescas Fernández-Bermejo                                                                                                                                                                                                                                                                                                                                                                                                           |
| EPI_ISL_7204336                                                                                                                                                                                                                                                                                                                                                                                                                                          | Hospital Universitari Dr. Josep Trueta                                  | Institut d'Investigació Biomèdica de Girona   Hospital Universitari Dr. Josep Trueta                                                       | Bernat del Olmo; Mel-lina Pinsach; Meritxell Deulofeu; Nuria Esther Neto; Paula Costa                                                                                                                                                                                                                                                                                                                                                                                                                                               |
| EPI_ISL_7598538                                                                                                                                                                                                                                                                                                                                                                                                                                          | Hospital Universitari Joan XXIII de Tarragona                           | Hospital Universitari Vall d'Hebron - Vall d'Hebron Institut de Recerca                                                                    | Alejandra González-Sánchez; Andrés Antón; Ariadna Rando; Carla Castillo; Cristina Andrés; Damir Garcia-Cehic; Josep Quer; Juliana Esperalba; Karen García; María Carmen Martín; María Gema Codina; María Piñana; Rodrigo Vázquez; Tomàs Pumarola                                                                                                                                                                                                                                                                                    |
| EPI_ISL_7050911, EPI_ISL_7050918, EPI_ISL_7406515, EPI_ISL_7598503,                                                                                                                                                                                                                                                                                                                                                                                      | Hospital Universitari Vall d'Hebron - Vall d'Hebron Institut de Recerca | Hospital Universitari Vall d'Hebron - Vall d'Hebron Institut de Recerca                                                                    | Alejandra González-Sánchez; Andrés Antón; Ariadna Rando; Carla Castillo; Cristina Andrés; Damir Garcia-Cehic; Josep Quer; Juliana Esperalba; Karen García; María Carmen Martín; María Gema Codina; María Piñana; Rodrigo Vázquez; Tomàs Pumarola                                                                                                                                                                                                                                                                                    |

|                                                                                                                                                                                                                                                                                                                                                                                                                                                                                                                                               |                                                                                                                      |                                                                                                              |                                                                                                                                                                                                                                                                                                                                                                                                                                                                                                                                        |  |
|-----------------------------------------------------------------------------------------------------------------------------------------------------------------------------------------------------------------------------------------------------------------------------------------------------------------------------------------------------------------------------------------------------------------------------------------------------------------------------------------------------------------------------------------------|----------------------------------------------------------------------------------------------------------------------|--------------------------------------------------------------------------------------------------------------|----------------------------------------------------------------------------------------------------------------------------------------------------------------------------------------------------------------------------------------------------------------------------------------------------------------------------------------------------------------------------------------------------------------------------------------------------------------------------------------------------------------------------------------|--|
| EPI_ISL_7598554,<br>EPI_ISL_7598569                                                                                                                                                                                                                                                                                                                                                                                                                                                                                                           |                                                                                                                      |                                                                                                              |                                                                                                                                                                                                                                                                                                                                                                                                                                                                                                                                        |  |
| EPI_ISL_7277268                                                                                                                                                                                                                                                                                                                                                                                                                                                                                                                               | Hospital Universitario Son Espases                                                                                   | Hospital Universitario Son Espases                                                                           | Dr. Antonio Oliver; Dr. Carla López-Causapé; Dr. Gabriel Cabot; Hospital Universitario Son Espases; on behalf of Servicio de Microbiología                                                                                                                                                                                                                                                                                                                                                                                             |  |
| EPI_ISL_7329633                                                                                                                                                                                                                                                                                                                                                                                                                                                                                                                               | Hospital Universitario de Guadalajara                                                                                | Hospital General Universitario de Ciudad Real                                                                | Cristina Colmenarejo; José Martínez-Alarcón; Lidia García-Agudo; Marta Torres-Narbona; Soledad Illescas Fernández-Bermejo                                                                                                                                                                                                                                                                                                                                                                                                              |  |
| EPI_ISL_7156454                                                                                                                                                                                                                                                                                                                                                                                                                                                                                                                               | Hospital Ángeles Lomas                                                                                               | Instituto de diagnóstico y Referencia Epidemiológicos (INDRE)                                                | Abriol Rodríguez-Maldonado; Ariadna Medina-Benitez; Armando Rojo; Claudia Wong-Arambula; Ernesto Ramirez-Gonzalez; Fernando Gonzalez-Dominguez; Gisela Barrera-Badillo; Irma Lopez-Martinez; Joaquin Quiroz-Mercado; Leonardo Medina Arias; Lucia Hernandez-Rivas; Maribel Gonzalez-Villa; Natividad Cruz-Ortiz; Pilar Escamilla Llano; Raymundo Rodriguez Sandoval; Tatiana Nunez-Garcia; Vanessa Rivero-Arredondo                                                                                                                    |  |
| EPI_ISL_7599319                                                                                                                                                                                                                                                                                                                                                                                                                                                                                                                               | Houston Health Dept.                                                                                                 | Houston Health Dept.                                                                                         | Adolfo Lara; Pamela Brown; Ryker Penn; Yanlai Lai                                                                                                                                                                                                                                                                                                                                                                                                                                                                                      |  |
| EPI_ISL_7415721, EPI_ISL_7415723, EPI_ISL_7415731, EPI_ISL_7415752, EPI_ISL_7415767, EPI_ISL_7415770, EPI_ISL_7415774, EPI_ISL_7415830, EPI_ISL_7415887, EPI_ISL_7602881, EPI_ISL_7602890, EPI_ISL_7602896, EPI_ISL_7603271, EPI_ISL_7603282, EPI_ISL_7603681, EPI_ISL_7603695, EPI_ISL_7603810, EPI_ISL_7603844, EPI_ISL_7603977, EPI_ISL_7604046, EPI_ISL_7604065, EPI_ISL_7604211, EPI_ISL_7604216, EPI_ISL_7604217, EPI_ISL_7604227, EPI_ISL_7604250, EPI_ISL_7604285, EPI_ISL_7604367, EPI_ISL_7604480, EPI_ISL_7604505, EPI_ISL_7612854 | Houston Methodist Hospital                                                                                           | Houston Methodist Hospital                                                                                   | Ilya J. Finkelstein; James J. Davis; Jessica Cambric; Jimmy Gollihar; Kristina Reppond; Layne Pruitt; Madison N. Shyer; Marcus Nguyen; Matthew Ojeda Saavedra; Paul A. Christensen; Prasanti Yerramilli; Randall J. Olsen; Robert Olson; Ryan Gadd; S. Wesley Long; Sishir Subedi; and James M. Musser                                                                                                                                                                                                                                 |  |
| see above                                                                                                                                                                                                                                                                                                                                                                                                                                                                                                                                     | Houston Methodist Hospital                                                                                           | Houston Methodist Hospital                                                                                   | Anita Jurić; Dragan Jurić; Irena Tabain; Ivana Ferenčak; Josipa Kuzle; Ljiljana Žmak; Mihaela Obrovac                                                                                                                                                                                                                                                                                                                                                                                                                                  |  |
| EPI_ISL_7210427,<br>EPI_ISL_7635857                                                                                                                                                                                                                                                                                                                                                                                                                                                                                                           | Hrvatski zavod za javno zdravstvo                                                                                    | Hrvatski zavod za javno zdravstvo                                                                            |                                                                                                                                                                                                                                                                                                                                                                                                                                                                                                                                        |  |
| EPI_ISL_7154340, EPI_ISL_7156753, EPI_ISL_7308635, EPI_ISL_7308771, EPI_ISL_7308875, EPI_ISL_7381064, EPI_ISL_7552474, EPI_ISL_7552479, EPI_ISL_7552666, EPI_ISL_7552686, EPI_ISL_7552693, EPI_ISL_7602123, EPI_ISL_7602445, EPI_ISL_7602500, EPI_ISL_7602605, EPI_ISL_7602741, EPI_ISL_7602776, EPI_ISL_7602813                                                                                                                                                                                                                              | see above                                                                                                            | IHU Mediterranee Infection                                                                                   | Philippe Colson et al.                                                                                                                                                                                                                                                                                                                                                                                                                                                                                                                 |  |
| EPI_ISL_7439547, EPI_ISL_7439558, EPI_ISL_7439622, EPI_ISL_7439646, EPI_ISL_7439650, EPI_ISL_7439657, EPI_ISL_7439722, EPI_ISL_7439730, EPI_ISL_7439754, EPI_ISL_7439781, EPI_ISL_7439806, EPI_ISL_7439827, EPI_ISL_7439832, EPI_ISL_7439902, EPI_ISL_7439935                                                                                                                                                                                                                                                                                 | see above                                                                                                            | IMD - MVZ Labor Martinsried                                                                                  | Robert Koch Institute                                                                                                                                                                                                                                                                                                                                                                                                                                                                                                                  |  |
| EPI_ISL_7451030,<br>EPI_ISL_7451040,<br>EPI_ISL_7451054,<br>EPI_ISL_7451096,<br>EPI_ISL_7565411                                                                                                                                                                                                                                                                                                                                                                                                                                               | see above                                                                                                            | INSA                                                                                                         | Instituto Nacional de Saude (INSA)                                                                                                                                                                                                                                                                                                                                                                                                                                                                                                     |  |
| EPI_ISL_7496734<br>EPI_ISL_7544430                                                                                                                                                                                                                                                                                                                                                                                                                                                                                                            | Idaho Bureau of Laboratories<br>Ikhwezi CDC w/ IKW                                                                   | Idaho Bureau of Laboratories<br>NHLS/UCT                                                                     | "R. Beukelman; Aimee Ceniseros; Christian Loera; Christopher Ball"; Matthew Charles Burns; Robert L. Voermans<br>Arash Iranzadeh; Bruna Galvao; Carolyn Williamson; Deelan Doolabh; Diana Hardie; Gert Marais; Innocent Mudau; Luicer Olubayo; Lynn Tyers; Marvin Hsiao; Nokuzola Mbhele; Rageema Joseph; Stephen Korsman                                                                                                                                                                                                              |  |
| EPI_ISL_7660164,<br>EPI_ISL_7660215,<br>EPI_ISL_7660217                                                                                                                                                                                                                                                                                                                                                                                                                                                                                       | Illinois Department of Public Health                                                                                 | Illinois Department of Public Health - Chicago Lab                                                           | Ira Heimler; Joel Price; Vineet K. Dhiman                                                                                                                                                                                                                                                                                                                                                                                                                                                                                              |  |
| EPI_ISL_7381102                                                                                                                                                                                                                                                                                                                                                                                                                                                                                                                               | Indian Council of Medical Research-National Institute of Virology, Microbial Containment Complex                     | Indian Council of Medical Research-National Institute of Virology, Microbial Containment Complex             | Pragya D. Yadav                                                                                                                                                                                                                                                                                                                                                                                                                                                                                                                        |  |
| EPI_ISL_7166400<br>EPI_ISL_7607424                                                                                                                                                                                                                                                                                                                                                                                                                                                                                                            | Indira Gandhi Memorial Hospital Infectious Disease Diagnostics Laboratory at the Children's Hospital of Philadelphia | Indira Gandhi Memorial Hospital Planet Lab, Children's Hospital of Philadelphia                              | D. Fathmath Nazla Rafeeq; Dr. Ibrahim Afzal; Mr. Ibrahim Nishan Ahmed; Ms. Aishath Shuhudha; Ms. Aminath Shazleena Abdul Rahman<br>Ahmed M. Moustafa; Alex Arvanitis; Andries Feder; Azad Ahmed; Bhaswati Sen; Donald C. Hall; Joshua Chang Mell; Paul J. Planet; Rebecca M. Harris; Swetha Rajagopal; Will Dampier                                                                                                                                                                                                                    |  |
| EPI_ISL_7497749                                                                                                                                                                                                                                                                                                                                                                                                                                                                                                                               | Infinity Biologix                                                                                                    | Centers for Disease Control and Prevention Division of Viral Diseases, Pathogen Discovery                    | Benjamin Rambo-Martin; Chirayu Goswami; Christian Bixby; Christopher Gulvick; Clinton Paden; Dakota Howard; Dhvani Batra; Duncan MacCannell; Erisa Sula; Jason Caravas; Jonathan Schultz; Kristine Lacek; Matthew Schmerer; Peter Cook; Robin Grimwood; Russ Hager; Scott Sammons; Shatavia Morrison; Tymeckia Kendall; Victoria Caban Figueroa; Yihe Wang; Yvette Unoarumhi                                                                                                                                                           |  |
| EPI_ISL_7405329                                                                                                                                                                                                                                                                                                                                                                                                                                                                                                                               | Inselspital Bern (Covid-Track)                                                                                       | Institute for Infectious Diseases, University of Bern                                                        | Alban Ramette; Christian Baumann; Cora Sägesser; Franziska Suter-Riniker; Loïc Borcard; Miguel A Terrazos Miani; Nicole Liechti; Pascal Bittel; Peter Keller; Sonja Gempeler; Stefan Neuenschwander; Stephen L Leib                                                                                                                                                                                                                                                                                                                    |  |
| EPI_ISL_7117396                                                                                                                                                                                                                                                                                                                                                                                                                                                                                                                               | Institut für Labormedizin Mikrobiologie und Hygiene                                                                  | Robert Koch Institute                                                                                        |                                                                                                                                                                                                                                                                                                                                                                                                                                                                                                                                        |  |
| EPI_ISL_6832737                                                                                                                                                                                                                                                                                                                                                                                                                                                                                                                               | Institute for Medical Virology Frankfurt                                                                             | Institute for Medical Virology Frankfurt                                                                     | Ciesek S.; Toptan T.                                                                                                                                                                                                                                                                                                                                                                                                                                                                                                                   |  |
| EPI_ISL_6959868, EPI_ISL_6959869, EPI_ISL_6959870, EPI_ISL_6959871, EPI_ISL_6959872, EPI_ISL_6959873, EPI_ISL_6959874, EPI_ISL_7479163, EPI_ISL_7479173, EPI_ISL_7479181, EPI_ISL_7479186, EPI_ISL_7479193, EPI_ISL_7479200, EPI_ISL_7479206                                                                                                                                                                                                                                                                                                  | see above                                                                                                            | Institute for Medical Virology, Frankfurt                                                                    | Ciesek S.; Toptan T.                                                                                                                                                                                                                                                                                                                                                                                                                                                                                                                   |  |
| EPI_ISL_7404462,<br>EPI_ISL_7404463                                                                                                                                                                                                                                                                                                                                                                                                                                                                                                           | Institute of Epidemiology, Disease Control and Research (IEDCR)                                                      | IEDCR-ideSHi Genomics Lab                                                                                    | Firdausi Qadri; Hassan Afrad; Manjur Hossain Khan; Omar Hamza; Tahmina Shirin                                                                                                                                                                                                                                                                                                                                                                                                                                                          |  |
| EPI_ISL_7507055                                                                                                                                                                                                                                                                                                                                                                                                                                                                                                                               | Institute of Medical Science, University of Tokyo                                                                    | Center for Influenza and Respiratory Virus Research, National Institute of Infectious Diseases (NIID)        | Emi Takashita; Hideka Miura; Seiichiro Fujisaki; Yoshihiro Kawaoka; Yuko Sakai-Tagawa                                                                                                                                                                                                                                                                                                                                                                                                                                                  |  |
| EPI_ISL_6825546,<br>EPI_ISL_6902052,<br>EPI_ISL_6902053                                                                                                                                                                                                                                                                                                                                                                                                                                                                                       | Institute of Virology, Department of Hygiene, Microbiology and Public Health at Innsbruck Medical University         | Institute of Virology, Department of Hygiene, Microbiology and Public Health at Innsbruck Medical University | Andreas Aufschnaiter; Barbara Falkensammer; David Bante; Dorothee von Laer; Heribert Stoiber; Lukas Perro; Stephan Amstler; Wegene Borena                                                                                                                                                                                                                                                                                                                                                                                              |  |
| EPI_ISL_7550075                                                                                                                                                                                                                                                                                                                                                                                                                                                                                                                               | Instituto Adolfo Lutz - Regional de Rio Claro                                                                        | Instituto Adolfo Lutz, Interdisciplinary Procedures Center, Strategic Laboratory                             | Claudio Tavares Sacchi; Karoline Rodrigues Campos                                                                                                                                                                                                                                                                                                                                                                                                                                                                                      |  |
| EPI_ISL_7632052                                                                                                                                                                                                                                                                                                                                                                                                                                                                                                                               | Invenimus AG                                                                                                         | Institute of Medical Virology, University of Zurich                                                          | Alexandra Trkola; Annette Audigé; Catharine Aquino; Cyril Shah; Daniel Ehrsam; Gabriela Ziltener; Guido Bloemberg; Hubert Rehrauer; Isabel Stürmer; Joel Wirz; Jon Huder; Jürg Böni; Kevin Steiner; Maria Grünberg; Maryam Zaheri; Michael Huber; Riccarda Capaul; Stefan Schmutz; Verena Kufner; Weihong Qi                                                                                                                                                                                                                           |  |
| EPI_ISL_7571605,<br>EPI_ISL_7571606,<br>EPI_ISL_7571607,<br>EPI_ISL_7571608,<br>EPI_ISL_7571612,<br>EPI_ISL_7571614                                                                                                                                                                                                                                                                                                                                                                                                                           | Iressef Genomics lab                                                                                                 | IRESEF                                                                                                       | Abdou PADANE; Ambroise AHOUIDI; Aminata DIA; Aminata MBOUP; Astou Gaye GAYE; Barada CISSE; Birahim Piere NDIAYE; Cyrille Diedhiou; Diabou Diagne; Gora LO; Khadim GUEYE; Moustapha MBOW; Nafisatou LEYE; Ndeye Coumba Toure KANE; Papa Alassane DIAW; Samba Ndiour; Seni Ndiaye; Souleymane MBOUP; Yacine DIA                                                                                                                                                                                                                          |  |
| EPI_ISL_7160424                                                                                                                                                                                                                                                                                                                                                                                                                                                                                                                               | Johns Hopkins Hospital Department of Pathology                                                                       | Johns Hopkins Hospital Department of Pathology                                                               | Amary Fall; C. Paul Morris; David Gaston; Heba H. Mostafa; Julie M. Norton; Matthew Schwartz; Michael Forman; Raghdha Eldesouki                                                                                                                                                                                                                                                                                                                                                                                                        |  |
| EPI_ISL_7605595, EPI_ISL_7605596, EPI_ISL_7605597, EPI_ISL_7605598, EPI_ISL_7605599, EPI_ISL_7605600, EPI_ISL_7605601, EPI_ISL_7605617, EPI_ISL_7605618, EPI_ISL_7605619, EPI_ISL_7605622, EPI_ISL_7605641, EPI_ISL_7605642, EPI_ISL_7605643, EPI_ISL_7605644, EPI_ISL_7605645, EPI_ISL_7605646, EPI_ISL_7605647, EPI_ISL_7605648, EPI_ISL_7605649, EPI_ISL_7605650, EPI_ISL_7605681, EPI_ISL_7605683, EPI_ISL_7605686, EPI_ISL_7605690, EPI_ISL_7605706, EPI_ISL_7605707, EPI_ISL_7605741                                                    | see above                                                                                                            | KIMBERLEY LABORATORY                                                                                         | National Institute for Communicable Diseases of the National Health Laboratory Service<br>Amoako DG; Bhiman JN; Everatt J; Ismail A; Mahlangu B; Mnguni A; Mohale T; Ntuli N; Scheepers C; Wolter N                                                                                                                                                                                                                                                                                                                                    |  |
| EPI_ISL_6794907, EPI_ISL_6989250, EPI_ISL_7413964, EPI_ISL_7495278, EPI_ISL_7495279, EPI_ISL_7495280, EPI_ISL_7495281, EPI_ISL_7495282, EPI_ISL_7495283, EPI_ISL_7495284, EPI_ISL_7495285                                                                                                                                                                                                                                                                                                                                                     | see above                                                                                                            | KU Leuven, Rega Institute, Clinical and Epidemiological Virology                                             | Bert Vanmechelen; Casper Geenen; Emmanuel André; Guy Baele; Joan Marti-Carerras; Joren; Lize Cuyppers; Piet Maes; Raymenants; Sarah Gorissen; Simon Dellicour; Tony Wawina-Bokalanga                                                                                                                                                                                                                                                                                                                                                   |  |
| EPI_ISL_7622272,<br>EPI_ISL_7622286,<br>EPI_ISL_7622287                                                                                                                                                                                                                                                                                                                                                                                                                                                                                       | Kaiser Permanente NW Regional Lab                                                                                    | OHSU MM Lab                                                                                                  | Amber Halse; Jeannine Lama; Xuan Qin; Yun Wu                                                                                                                                                                                                                                                                                                                                                                                                                                                                                           |  |
| EPI_ISL_7652567                                                                                                                                                                                                                                                                                                                                                                                                                                                                                                                               | Karolinska University Hospital Huddinge                                                                              | Karolinska University Hospital                                                                               | Annika Tiveljung Lindell; Henning Onsbring; Jan Albert; Karina Hentrich; Lynda Eneh; Maria Ropat; Martin Ekman; Natalija Gerasimcik; Robert Dyrdak; Sandra Broddesson; Shambhu Ganeshappa Aralaguppe; Tanja Normark; Tobias Allander; Valterri Wirta; Zhibing Yun                                                                                                                                                                                                                                                                      |  |
| EPI_ISL_7219990,<br>EPI_ISL_7220437,<br>EPI_ISL_7220444,<br>EPI_ISL_7286284                                                                                                                                                                                                                                                                                                                                                                                                                                                                   | Karolinska University Hospital Huddinge                                                                              | Karolinska University Hospital Huddinge                                                                      | Annika Tiveljung Lindell; Henning Onsbring; Jan Albert; Karina Hentrich; Lynda Eneh; Maria Ropat; Martin Ekman; Natalija Gerasimcik; Robert Dyrdak; Sandra Broddesson; Shambhu Ganeshappa Aralaguppe; Tanja Normark; Tobias Allander; Valterri Wirta; Zhibing Yun                                                                                                                                                                                                                                                                      |  |
| EPI_ISL_7652445<br>EPI_ISL_7381109,<br>EPI_ISL_7381114,<br>EPI_ISL_7457425,<br>EPI_ISL_7457426                                                                                                                                                                                                                                                                                                                                                                                                                                                | Karolinska University Hospital Solna<br>Karolinska University Hospital Solna                                         | Karolinska University Hospital<br>Karolinska University Hospital Huddinge                                    | Annika Tiveljung Lindell; Henning Onsbring; Jan Albert; Karina Hentrich; Lynda Eneh; Maria Ropat; Martin Ekman; Natalija Gerasimcik; Robert Dyrdak; Sandra Broddesson; Shambhu Ganeshappa Aralaguppe; Tanja Normark; Tobias Allander; Valterri Wirta; Zhibing Yun<br>Annika Tiveljung Lindell; Henning Onsbring; Jan Albert; Karina Hentrich; Lynda Eneh; Maria Ropat; Martin Ekman; Natalija Gerasimcik; Robert Dyrdak; Sandra Broddesson; Shambhu Ganeshappa Aralaguppe; Tanja Normark; Tobias Allander; Valterri Wirta; Zhibing Yun |  |
| EPI_ISL_7433816,                                                                                                                                                                                                                                                                                                                                                                                                                                                                                                                              | Klinikum Ernst von Bergmann                                                                                          | Robert Koch Institute                                                                                        |                                                                                                                                                                                                                                                                                                                                                                                                                                                                                                                                        |  |

|                                                                                                                                                                                                                                                                                                                                                                                                                                                                                                                                                                                                                                                                                                                                                                                                                                                                                                                                                                                                                                                                                                                                                                                                                                                                                                                                                                                                                                                                                                                                                                                                                                                                                                                                                                                                                                                                                                                                                                                                                                                                                                                                                                                                                                                                                                                                                                                                                                                                                                                                                                                                                                                                                                                                                                                                                                                                                                                                                                                                                                                                                                                                                                                                                                                                                                                                                                                                                                                                                                                                                                                                                                                                                                                                                                                                                                                                                                                                                                                                                                                                                                                                                                                                                                                                                                                                                                                                                                                                                                                                                                                                                                                                                                                                                                                                                                                                                                                                                                                                                                                                                                                                                                                                                                                                                                                                                                                                                                                                                                                                                                                                                                                                                                                                                                                                                                                                                                                                                                                                                                                                                                                                                                                                                                                                                                                                                                                                                                                                                                                                                                                                                                                                                                                                                                                                                                                                                                                                                                                                                                                                                                                                                                                                                                                                                                                                                                                                                                                                                                                                                                                                                                                                                                                                                                                                                                                                                                                                                                                                                                                                                                                                                                                                                                                                                                                                                                                                                                                                                                                                                                                                                                                                                                                                                                                                                                                                                                                                                                                                                                                                                                                                                                                                                                                                                                                                                                                                                                                                                                                                                                                                                                                                                                                                                                                                                                                                                                                                                                                                                                                                                                                                                                                                                                                                                                                                                                                                                                                                                                                                                                                                                                                                                                                                                                                                                                                                                                                                                                                                                                                                                                                                                                                                                                                                                                                                                                                                                                                                                                                                                                                                                                                                                                                                                                                                         |                                                                                                              |                                                                                                                      |                                                                                                                                                                                                                                                                                                                                                                                                                                                                                                                                                                                                                                                                                                                                                                                                                                                                                                                                                                                                                                                                 |
|---------------------------------------------------------------------------------------------------------------------------------------------------------------------------------------------------------------------------------------------------------------------------------------------------------------------------------------------------------------------------------------------------------------------------------------------------------------------------------------------------------------------------------------------------------------------------------------------------------------------------------------------------------------------------------------------------------------------------------------------------------------------------------------------------------------------------------------------------------------------------------------------------------------------------------------------------------------------------------------------------------------------------------------------------------------------------------------------------------------------------------------------------------------------------------------------------------------------------------------------------------------------------------------------------------------------------------------------------------------------------------------------------------------------------------------------------------------------------------------------------------------------------------------------------------------------------------------------------------------------------------------------------------------------------------------------------------------------------------------------------------------------------------------------------------------------------------------------------------------------------------------------------------------------------------------------------------------------------------------------------------------------------------------------------------------------------------------------------------------------------------------------------------------------------------------------------------------------------------------------------------------------------------------------------------------------------------------------------------------------------------------------------------------------------------------------------------------------------------------------------------------------------------------------------------------------------------------------------------------------------------------------------------------------------------------------------------------------------------------------------------------------------------------------------------------------------------------------------------------------------------------------------------------------------------------------------------------------------------------------------------------------------------------------------------------------------------------------------------------------------------------------------------------------------------------------------------------------------------------------------------------------------------------------------------------------------------------------------------------------------------------------------------------------------------------------------------------------------------------------------------------------------------------------------------------------------------------------------------------------------------------------------------------------------------------------------------------------------------------------------------------------------------------------------------------------------------------------------------------------------------------------------------------------------------------------------------------------------------------------------------------------------------------------------------------------------------------------------------------------------------------------------------------------------------------------------------------------------------------------------------------------------------------------------------------------------------------------------------------------------------------------------------------------------------------------------------------------------------------------------------------------------------------------------------------------------------------------------------------------------------------------------------------------------------------------------------------------------------------------------------------------------------------------------------------------------------------------------------------------------------------------------------------------------------------------------------------------------------------------------------------------------------------------------------------------------------------------------------------------------------------------------------------------------------------------------------------------------------------------------------------------------------------------------------------------------------------------------------------------------------------------------------------------------------------------------------------------------------------------------------------------------------------------------------------------------------------------------------------------------------------------------------------------------------------------------------------------------------------------------------------------------------------------------------------------------------------------------------------------------------------------------------------------------------------------------------------------------------------------------------------------------------------------------------------------------------------------------------------------------------------------------------------------------------------------------------------------------------------------------------------------------------------------------------------------------------------------------------------------------------------------------------------------------------------------------------------------------------------------------------------------------------------------------------------------------------------------------------------------------------------------------------------------------------------------------------------------------------------------------------------------------------------------------------------------------------------------------------------------------------------------------------------------------------------------------------------------------------------------------------------------------------------------------------------------------------------------------------------------------------------------------------------------------------------------------------------------------------------------------------------------------------------------------------------------------------------------------------------------------------------------------------------------------------------------------------------------------------------------------------------------------------------------------------------------------------------------------------------------------------------------------------------------------------------------------------------------------------------------------------------------------------------------------------------------------------------------------------------------------------------------------------------------------------------------------------------------------------------------------------------------------------------------------------------------------------------------------------------------------------------------------------------------------------------------------------------------------------------------------------------------------------------------------------------------------------------------------------------------------------------------------------------------------------------------------------------------------------------------------------------------------------------------------------------------------------------------------------------------------------------------------------------------------------------------------------------------------------------------------------------------------------------------------------------------------------------------------------------------------------------------------------------------------------------------------------------------------------------------------------------------------------------------------------------------------------------------------------------------------------------------------------------------------------------------------------------------------------------------------------------------------------------------------------------------------------------------------------------------------------------------------------------------------------------------------------------------------------------------------------------------------------------------------------------------------------------------------------------------------------------------------------------------------------------------------------------------------------------------------------------------------------------------------------------------------------------------------------------------------------------------------------------------------------------------------------------------------------------------------------------------------------------------------------------------------------------------------------------------------------------------------------------------------------------------------------------------------------------------------------------------------------------------------------------------------------------------------------------------------------------------------------------------------------------------------------------------------------------------------------------------------------------------------------------------------------------------------------------------------------------------------------------------------------------------------------------------------------------------------------------------------------------------------------------------------------------------------------------------------------------------------------------------------------------------------------------------------------------------------------------------------------------------------------------------------------------------------------------------------------------------------------------------------------------------------------------------------------------------------------------------------------------------------------------------------------------------------------------------------------------------------------------------------------------------------------------------------------------------------------------------------------------------------------------------------------------------------------------------------------------------------------------------------------------------------------------------------------------------------------------------------------------------------------|--------------------------------------------------------------------------------------------------------------|----------------------------------------------------------------------------------------------------------------------|-----------------------------------------------------------------------------------------------------------------------------------------------------------------------------------------------------------------------------------------------------------------------------------------------------------------------------------------------------------------------------------------------------------------------------------------------------------------------------------------------------------------------------------------------------------------------------------------------------------------------------------------------------------------------------------------------------------------------------------------------------------------------------------------------------------------------------------------------------------------------------------------------------------------------------------------------------------------------------------------------------------------------------------------------------------------|
| EPI_ISL_7443667,<br>EPI_ISL_7443713                                                                                                                                                                                                                                                                                                                                                                                                                                                                                                                                                                                                                                                                                                                                                                                                                                                                                                                                                                                                                                                                                                                                                                                                                                                                                                                                                                                                                                                                                                                                                                                                                                                                                                                                                                                                                                                                                                                                                                                                                                                                                                                                                                                                                                                                                                                                                                                                                                                                                                                                                                                                                                                                                                                                                                                                                                                                                                                                                                                                                                                                                                                                                                                                                                                                                                                                                                                                                                                                                                                                                                                                                                                                                                                                                                                                                                                                                                                                                                                                                                                                                                                                                                                                                                                                                                                                                                                                                                                                                                                                                                                                                                                                                                                                                                                                                                                                                                                                                                                                                                                                                                                                                                                                                                                                                                                                                                                                                                                                                                                                                                                                                                                                                                                                                                                                                                                                                                                                                                                                                                                                                                                                                                                                                                                                                                                                                                                                                                                                                                                                                                                                                                                                                                                                                                                                                                                                                                                                                                                                                                                                                                                                                                                                                                                                                                                                                                                                                                                                                                                                                                                                                                                                                                                                                                                                                                                                                                                                                                                                                                                                                                                                                                                                                                                                                                                                                                                                                                                                                                                                                                                                                                                                                                                                                                                                                                                                                                                                                                                                                                                                                                                                                                                                                                                                                                                                                                                                                                                                                                                                                                                                                                                                                                                                                                                                                                                                                                                                                                                                                                                                                                                                                                                                                                                                                                                                                                                                                                                                                                                                                                                                                                                                                                                                                                                                                                                                                                                                                                                                                                                                                                                                                                                                                                                                                                                                                                                                                                                                                                                                                                                                                                                                                                                                                                     | gemeinnützige GmbH - stationärer Bereich                                                                     |                                                                                                                      |                                                                                                                                                                                                                                                                                                                                                                                                                                                                                                                                                                                                                                                                                                                                                                                                                                                                                                                                                                                                                                                                 |
| EPI_ISL_7611152                                                                                                                                                                                                                                                                                                                                                                                                                                                                                                                                                                                                                                                                                                                                                                                                                                                                                                                                                                                                                                                                                                                                                                                                                                                                                                                                                                                                                                                                                                                                                                                                                                                                                                                                                                                                                                                                                                                                                                                                                                                                                                                                                                                                                                                                                                                                                                                                                                                                                                                                                                                                                                                                                                                                                                                                                                                                                                                                                                                                                                                                                                                                                                                                                                                                                                                                                                                                                                                                                                                                                                                                                                                                                                                                                                                                                                                                                                                                                                                                                                                                                                                                                                                                                                                                                                                                                                                                                                                                                                                                                                                                                                                                                                                                                                                                                                                                                                                                                                                                                                                                                                                                                                                                                                                                                                                                                                                                                                                                                                                                                                                                                                                                                                                                                                                                                                                                                                                                                                                                                                                                                                                                                                                                                                                                                                                                                                                                                                                                                                                                                                                                                                                                                                                                                                                                                                                                                                                                                                                                                                                                                                                                                                                                                                                                                                                                                                                                                                                                                                                                                                                                                                                                                                                                                                                                                                                                                                                                                                                                                                                                                                                                                                                                                                                                                                                                                                                                                                                                                                                                                                                                                                                                                                                                                                                                                                                                                                                                                                                                                                                                                                                                                                                                                                                                                                                                                                                                                                                                                                                                                                                                                                                                                                                                                                                                                                                                                                                                                                                                                                                                                                                                                                                                                                                                                                                                                                                                                                                                                                                                                                                                                                                                                                                                                                                                                                                                                                                                                                                                                                                                                                                                                                                                                                                                                                                                                                                                                                                                                                                                                                                                                                                                                                                                                                                         | LABORATOIRE BIOALLIANCE                                                                                      | CNR Virus des Infections Respiratoires - France SUD                                                                  | Antonin Bai; Bruno Lina; Bruno Simon; Gregory Destras; Gwendolyne Burfin; Hadrien Regue; Laurence Josset; Martine Valette; Quentin Semans                                                                                                                                                                                                                                                                                                                                                                                                                                                                                                                                                                                                                                                                                                                                                                                                                                                                                                                       |
| EPI_ISL_7224971                                                                                                                                                                                                                                                                                                                                                                                                                                                                                                                                                                                                                                                                                                                                                                                                                                                                                                                                                                                                                                                                                                                                                                                                                                                                                                                                                                                                                                                                                                                                                                                                                                                                                                                                                                                                                                                                                                                                                                                                                                                                                                                                                                                                                                                                                                                                                                                                                                                                                                                                                                                                                                                                                                                                                                                                                                                                                                                                                                                                                                                                                                                                                                                                                                                                                                                                                                                                                                                                                                                                                                                                                                                                                                                                                                                                                                                                                                                                                                                                                                                                                                                                                                                                                                                                                                                                                                                                                                                                                                                                                                                                                                                                                                                                                                                                                                                                                                                                                                                                                                                                                                                                                                                                                                                                                                                                                                                                                                                                                                                                                                                                                                                                                                                                                                                                                                                                                                                                                                                                                                                                                                                                                                                                                                                                                                                                                                                                                                                                                                                                                                                                                                                                                                                                                                                                                                                                                                                                                                                                                                                                                                                                                                                                                                                                                                                                                                                                                                                                                                                                                                                                                                                                                                                                                                                                                                                                                                                                                                                                                                                                                                                                                                                                                                                                                                                                                                                                                                                                                                                                                                                                                                                                                                                                                                                                                                                                                                                                                                                                                                                                                                                                                                                                                                                                                                                                                                                                                                                                                                                                                                                                                                                                                                                                                                                                                                                                                                                                                                                                                                                                                                                                                                                                                                                                                                                                                                                                                                                                                                                                                                                                                                                                                                                                                                                                                                                                                                                                                                                                                                                                                                                                                                                                                                                                                                                                                                                                                                                                                                                                                                                                                                                                                                                                                                                         | LACEN do Distrito Federal                                                                                    | Instituto Adolfo Lutz Strategic Laboratory                                                                           | Claudio Tavares Sacchi; Karoline Rodrigues Campos; Marlon Benedito Nascimento Santos                                                                                                                                                                                                                                                                                                                                                                                                                                                                                                                                                                                                                                                                                                                                                                                                                                                                                                                                                                            |
| EPI_ISL_7550076                                                                                                                                                                                                                                                                                                                                                                                                                                                                                                                                                                                                                                                                                                                                                                                                                                                                                                                                                                                                                                                                                                                                                                                                                                                                                                                                                                                                                                                                                                                                                                                                                                                                                                                                                                                                                                                                                                                                                                                                                                                                                                                                                                                                                                                                                                                                                                                                                                                                                                                                                                                                                                                                                                                                                                                                                                                                                                                                                                                                                                                                                                                                                                                                                                                                                                                                                                                                                                                                                                                                                                                                                                                                                                                                                                                                                                                                                                                                                                                                                                                                                                                                                                                                                                                                                                                                                                                                                                                                                                                                                                                                                                                                                                                                                                                                                                                                                                                                                                                                                                                                                                                                                                                                                                                                                                                                                                                                                                                                                                                                                                                                                                                                                                                                                                                                                                                                                                                                                                                                                                                                                                                                                                                                                                                                                                                                                                                                                                                                                                                                                                                                                                                                                                                                                                                                                                                                                                                                                                                                                                                                                                                                                                                                                                                                                                                                                                                                                                                                                                                                                                                                                                                                                                                                                                                                                                                                                                                                                                                                                                                                                                                                                                                                                                                                                                                                                                                                                                                                                                                                                                                                                                                                                                                                                                                                                                                                                                                                                                                                                                                                                                                                                                                                                                                                                                                                                                                                                                                                                                                                                                                                                                                                                                                                                                                                                                                                                                                                                                                                                                                                                                                                                                                                                                                                                                                                                                                                                                                                                                                                                                                                                                                                                                                                                                                                                                                                                                                                                                                                                                                                                                                                                                                                                                                                                                                                                                                                                                                                                                                                                                                                                                                                                                                                                                                         | LACEN do Distrito Federal                                                                                    | Instituto Adolfo Lutz, Interdisciplinary Procedures Center, Strategic Laboratory                                     | Claudio Tavares Sacchi; Karoline Rodrigues Campos                                                                                                                                                                                                                                                                                                                                                                                                                                                                                                                                                                                                                                                                                                                                                                                                                                                                                                                                                                                                               |
| EPI_ISL_7610177                                                                                                                                                                                                                                                                                                                                                                                                                                                                                                                                                                                                                                                                                                                                                                                                                                                                                                                                                                                                                                                                                                                                                                                                                                                                                                                                                                                                                                                                                                                                                                                                                                                                                                                                                                                                                                                                                                                                                                                                                                                                                                                                                                                                                                                                                                                                                                                                                                                                                                                                                                                                                                                                                                                                                                                                                                                                                                                                                                                                                                                                                                                                                                                                                                                                                                                                                                                                                                                                                                                                                                                                                                                                                                                                                                                                                                                                                                                                                                                                                                                                                                                                                                                                                                                                                                                                                                                                                                                                                                                                                                                                                                                                                                                                                                                                                                                                                                                                                                                                                                                                                                                                                                                                                                                                                                                                                                                                                                                                                                                                                                                                                                                                                                                                                                                                                                                                                                                                                                                                                                                                                                                                                                                                                                                                                                                                                                                                                                                                                                                                                                                                                                                                                                                                                                                                                                                                                                                                                                                                                                                                                                                                                                                                                                                                                                                                                                                                                                                                                                                                                                                                                                                                                                                                                                                                                                                                                                                                                                                                                                                                                                                                                                                                                                                                                                                                                                                                                                                                                                                                                                                                                                                                                                                                                                                                                                                                                                                                                                                                                                                                                                                                                                                                                                                                                                                                                                                                                                                                                                                                                                                                                                                                                                                                                                                                                                                                                                                                                                                                                                                                                                                                                                                                                                                                                                                                                                                                                                                                                                                                                                                                                                                                                                                                                                                                                                                                                                                                                                                                                                                                                                                                                                                                                                                                                                                                                                                                                                                                                                                                                                                                                                                                                                                                                                                         | LAM CERBALLIANCE                                                                                             | CNR Virus des Infections Respiratoires - France SUD                                                                  | Antonin Bai; Bruno Lina; Bruno Simon; Gregory Destras; Gwendolyne Burfin; Hadrien Regue; Laurence Josset; Martine Valette; Quentin Semans                                                                                                                                                                                                                                                                                                                                                                                                                                                                                                                                                                                                                                                                                                                                                                                                                                                                                                                       |
| EPI_ISL_6647956, EPI_ISL_6647957, EPI_ISL_6647958, EPI_ISL_6647959, EPI_ISL_6647960, EPI_ISL_6647961, EPI_ISL_6647962, EPI_ISL_6698792, EPI_ISL_6704863, EPI_ISL_6704864, EPI_ISL_6704865, EPI_ISL_6704866, EPI_ISL_6704867, EPI_ISL_6704868, EPI_ISL_6704869, EPI_ISL_6704870, EPI_ISL_6704871, EPI_ISL_6704872, EPI_ISL_6704873, EPI_ISL_6704874, EPI_ISL_6704875, EPI_ISL_6704876                                                                                                                                                                                                                                                                                                                                                                                                                                                                                                                                                                                                                                                                                                                                                                                                                                                                                                                                                                                                                                                                                                                                                                                                                                                                                                                                                                                                                                                                                                                                                                                                                                                                                                                                                                                                                                                                                                                                                                                                                                                                                                                                                                                                                                                                                                                                                                                                                                                                                                                                                                                                                                                                                                                                                                                                                                                                                                                                                                                                                                                                                                                                                                                                                                                                                                                                                                                                                                                                                                                                                                                                                                                                                                                                                                                                                                                                                                                                                                                                                                                                                                                                                                                                                                                                                                                                                                                                                                                                                                                                                                                                                                                                                                                                                                                                                                                                                                                                                                                                                                                                                                                                                                                                                                                                                                                                                                                                                                                                                                                                                                                                                                                                                                                                                                                                                                                                                                                                                                                                                                                                                                                                                                                                                                                                                                                                                                                                                                                                                                                                                                                                                                                                                                                                                                                                                                                                                                                                                                                                                                                                                                                                                                                                                                                                                                                                                                                                                                                                                                                                                                                                                                                                                                                                                                                                                                                                                                                                                                                                                                                                                                                                                                                                                                                                                                                                                                                                                                                                                                                                                                                                                                                                                                                                                                                                                                                                                                                                                                                                                                                                                                                                                                                                                                                                                                                                                                                                                                                                                                                                                                                                                                                                                                                                                                                                                                                                                                                                                                                                                                                                                                                                                                                                                                                                                                                                                                                                                                                                                                                                                                                                                                                                                                                                                                                                                                                                                                                                                                                                                                                                                                                                                                                                                                                                                                                                                                                                                    | see above                                                                                                    | LANCET LABORATORY                                                                                                    | National Institute for Communicable Diseases of the National Health Laboratory Service<br>Amoako DG; Bhiman JN; Everatt J; Glass A; Ismail A; Mahlangu B; Mnguni A; Mohale T; Ntuli N; Scheepers C; Viana R; Wolter N                                                                                                                                                                                                                                                                                                                                                                                                                                                                                                                                                                                                                                                                                                                                                                                                                                           |
| EPI_ISL_6901960, EPI_ISL_6901961, EPI_ISL_7473154                                                                                                                                                                                                                                                                                                                                                                                                                                                                                                                                                                                                                                                                                                                                                                                                                                                                                                                                                                                                                                                                                                                                                                                                                                                                                                                                                                                                                                                                                                                                                                                                                                                                                                                                                                                                                                                                                                                                                                                                                                                                                                                                                                                                                                                                                                                                                                                                                                                                                                                                                                                                                                                                                                                                                                                                                                                                                                                                                                                                                                                                                                                                                                                                                                                                                                                                                                                                                                                                                                                                                                                                                                                                                                                                                                                                                                                                                                                                                                                                                                                                                                                                                                                                                                                                                                                                                                                                                                                                                                                                                                                                                                                                                                                                                                                                                                                                                                                                                                                                                                                                                                                                                                                                                                                                                                                                                                                                                                                                                                                                                                                                                                                                                                                                                                                                                                                                                                                                                                                                                                                                                                                                                                                                                                                                                                                                                                                                                                                                                                                                                                                                                                                                                                                                                                                                                                                                                                                                                                                                                                                                                                                                                                                                                                                                                                                                                                                                                                                                                                                                                                                                                                                                                                                                                                                                                                                                                                                                                                                                                                                                                                                                                                                                                                                                                                                                                                                                                                                                                                                                                                                                                                                                                                                                                                                                                                                                                                                                                                                                                                                                                                                                                                                                                                                                                                                                                                                                                                                                                                                                                                                                                                                                                                                                                                                                                                                                                                                                                                                                                                                                                                                                                                                                                                                                                                                                                                                                                                                                                                                                                                                                                                                                                                                                                                                                                                                                                                                                                                                                                                                                                                                                                                                                                                                                                                                                                                                                                                                                                                                                                                                                                                                                                                                                                       | LATE - Laboratório de Técnicas Especiais - Hospital Israelita Albert Einstein                                | LATE - Laboratório de Técnicas Especiais - Hospital Israelita Albert Einstein                                        | Alexandre Hideaki Takara; Ana Paula Moreira Salles; Anelise da Silva Santos; Deyvid Amgarten; Erick Gustavo Dorlasi; Fernanda de Mello Malta; João Renato Rebelo Pinho; Luiz Vicente Rizzo; Marcio Anunciacao Menezes; Pedro Henrique Sebe Rodrigues; Raquel Riyuzo                                                                                                                                                                                                                                                                                                                                                                                                                                                                                                                                                                                                                                                                                                                                                                                             |
| EPI_ISL_7472277                                                                                                                                                                                                                                                                                                                                                                                                                                                                                                                                                                                                                                                                                                                                                                                                                                                                                                                                                                                                                                                                                                                                                                                                                                                                                                                                                                                                                                                                                                                                                                                                                                                                                                                                                                                                                                                                                                                                                                                                                                                                                                                                                                                                                                                                                                                                                                                                                                                                                                                                                                                                                                                                                                                                                                                                                                                                                                                                                                                                                                                                                                                                                                                                                                                                                                                                                                                                                                                                                                                                                                                                                                                                                                                                                                                                                                                                                                                                                                                                                                                                                                                                                                                                                                                                                                                                                                                                                                                                                                                                                                                                                                                                                                                                                                                                                                                                                                                                                                                                                                                                                                                                                                                                                                                                                                                                                                                                                                                                                                                                                                                                                                                                                                                                                                                                                                                                                                                                                                                                                                                                                                                                                                                                                                                                                                                                                                                                                                                                                                                                                                                                                                                                                                                                                                                                                                                                                                                                                                                                                                                                                                                                                                                                                                                                                                                                                                                                                                                                                                                                                                                                                                                                                                                                                                                                                                                                                                                                                                                                                                                                                                                                                                                                                                                                                                                                                                                                                                                                                                                                                                                                                                                                                                                                                                                                                                                                                                                                                                                                                                                                                                                                                                                                                                                                                                                                                                                                                                                                                                                                                                                                                                                                                                                                                                                                                                                                                                                                                                                                                                                                                                                                                                                                                                                                                                                                                                                                                                                                                                                                                                                                                                                                                                                                                                                                                                                                                                                                                                                                                                                                                                                                                                                                                                                                                                                                                                                                                                                                                                                                                                                                                                                                                                                                                                                         | LKO                                                                                                          | Jessa                                                                                                                | Severine Berden et al. on behalf of the Jessa_cmdLab                                                                                                                                                                                                                                                                                                                                                                                                                                                                                                                                                                                                                                                                                                                                                                                                                                                                                                                                                                                                            |
| EPI_ISL_7456529                                                                                                                                                                                                                                                                                                                                                                                                                                                                                                                                                                                                                                                                                                                                                                                                                                                                                                                                                                                                                                                                                                                                                                                                                                                                                                                                                                                                                                                                                                                                                                                                                                                                                                                                                                                                                                                                                                                                                                                                                                                                                                                                                                                                                                                                                                                                                                                                                                                                                                                                                                                                                                                                                                                                                                                                                                                                                                                                                                                                                                                                                                                                                                                                                                                                                                                                                                                                                                                                                                                                                                                                                                                                                                                                                                                                                                                                                                                                                                                                                                                                                                                                                                                                                                                                                                                                                                                                                                                                                                                                                                                                                                                                                                                                                                                                                                                                                                                                                                                                                                                                                                                                                                                                                                                                                                                                                                                                                                                                                                                                                                                                                                                                                                                                                                                                                                                                                                                                                                                                                                                                                                                                                                                                                                                                                                                                                                                                                                                                                                                                                                                                                                                                                                                                                                                                                                                                                                                                                                                                                                                                                                                                                                                                                                                                                                                                                                                                                                                                                                                                                                                                                                                                                                                                                                                                                                                                                                                                                                                                                                                                                                                                                                                                                                                                                                                                                                                                                                                                                                                                                                                                                                                                                                                                                                                                                                                                                                                                                                                                                                                                                                                                                                                                                                                                                                                                                                                                                                                                                                                                                                                                                                                                                                                                                                                                                                                                                                                                                                                                                                                                                                                                                                                                                                                                                                                                                                                                                                                                                                                                                                                                                                                                                                                                                                                                                                                                                                                                                                                                                                                                                                                                                                                                                                                                                                                                                                                                                                                                                                                                                                                                                                                                                                                                                                                         | LSUHS Emerging Viral Threat Lab                                                                              | LSUHS Emerging Viral Threat Laboratory                                                                               | Adrian Almodovar; Alexander Mijalis; Andrew D. Yurochko; Christopher G. Kevil; Gregory L. Ware; Jennifer L. Carroll; Jeremy P. Kamil; John A. Vanchiere; Krista Queen; Maarten Van Diest; Rona S. Scott                                                                                                                                                                                                                                                                                                                                                                                                                                                                                                                                                                                                                                                                                                                                                                                                                                                         |
| EPI_ISL_7339434, EPI_ISL_7339435, EPI_ISL_7339436, EPI_ISL_7651330, EPI_ISL_7651331, EPI_ISL_7651332, EPI_ISL_7651333, EPI_ISL_7651334, EPI_ISL_7651335, EPI_ISL_7651336, EPI_ISL_7651337                                                                                                                                                                                                                                                                                                                                                                                                                                                                                                                                                                                                                                                                                                                                                                                                                                                                                                                                                                                                                                                                                                                                                                                                                                                                                                                                                                                                                                                                                                                                                                                                                                                                                                                                                                                                                                                                                                                                                                                                                                                                                                                                                                                                                                                                                                                                                                                                                                                                                                                                                                                                                                                                                                                                                                                                                                                                                                                                                                                                                                                                                                                                                                                                                                                                                                                                                                                                                                                                                                                                                                                                                                                                                                                                                                                                                                                                                                                                                                                                                                                                                                                                                                                                                                                                                                                                                                                                                                                                                                                                                                                                                                                                                                                                                                                                                                                                                                                                                                                                                                                                                                                                                                                                                                                                                                                                                                                                                                                                                                                                                                                                                                                                                                                                                                                                                                                                                                                                                                                                                                                                                                                                                                                                                                                                                                                                                                                                                                                                                                                                                                                                                                                                                                                                                                                                                                                                                                                                                                                                                                                                                                                                                                                                                                                                                                                                                                                                                                                                                                                                                                                                                                                                                                                                                                                                                                                                                                                                                                                                                                                                                                                                                                                                                                                                                                                                                                                                                                                                                                                                                                                                                                                                                                                                                                                                                                                                                                                                                                                                                                                                                                                                                                                                                                                                                                                                                                                                                                                                                                                                                                                                                                                                                                                                                                                                                                                                                                                                                                                                                                                                                                                                                                                                                                                                                                                                                                                                                                                                                                                                                                                                                                                                                                                                                                                                                                                                                                                                                                                                                                                                                                                                                                                                                                                                                                                                                                                                                                                                                                                                                                                                               | see above                                                                                                    | Lab voor klinische biologie                                                                                          | Bruno Verhassel; Hannelore Hamerlinck; Marija Janevska; May-Linh Truong                                                                                                                                                                                                                                                                                                                                                                                                                                                                                                                                                                                                                                                                                                                                                                                                                                                                                                                                                                                         |
| EPI_ISL_7589521                                                                                                                                                                                                                                                                                                                                                                                                                                                                                                                                                                                                                                                                                                                                                                                                                                                                                                                                                                                                                                                                                                                                                                                                                                                                                                                                                                                                                                                                                                                                                                                                                                                                                                                                                                                                                                                                                                                                                                                                                                                                                                                                                                                                                                                                                                                                                                                                                                                                                                                                                                                                                                                                                                                                                                                                                                                                                                                                                                                                                                                                                                                                                                                                                                                                                                                                                                                                                                                                                                                                                                                                                                                                                                                                                                                                                                                                                                                                                                                                                                                                                                                                                                                                                                                                                                                                                                                                                                                                                                                                                                                                                                                                                                                                                                                                                                                                                                                                                                                                                                                                                                                                                                                                                                                                                                                                                                                                                                                                                                                                                                                                                                                                                                                                                                                                                                                                                                                                                                                                                                                                                                                                                                                                                                                                                                                                                                                                                                                                                                                                                                                                                                                                                                                                                                                                                                                                                                                                                                                                                                                                                                                                                                                                                                                                                                                                                                                                                                                                                                                                                                                                                                                                                                                                                                                                                                                                                                                                                                                                                                                                                                                                                                                                                                                                                                                                                                                                                                                                                                                                                                                                                                                                                                                                                                                                                                                                                                                                                                                                                                                                                                                                                                                                                                                                                                                                                                                                                                                                                                                                                                                                                                                                                                                                                                                                                                                                                                                                                                                                                                                                                                                                                                                                                                                                                                                                                                                                                                                                                                                                                                                                                                                                                                                                                                                                                                                                                                                                                                                                                                                                                                                                                                                                                                                                                                                                                                                                                                                                                                                                                                                                                                                                                                                                                                                         | Labo Analyses Med                                                                                            | National Reference Center for Viruses of Respiratory Infections, Institut Pasteur, Paris                             | Angela Brisebarre; Camille Capel; Christophe Malabat; Corinne Maufrais; Etienne Simon-Lorière; Frédéric Lemoine; Julien Fumey; Louise Lefrançois; Marion Barbet; Maud Vanpeene; Méline Bizard; Philippe GIRARD; Slim El Khiaï; Sylvie Behillili; Sylvie Van der Werf; Vincent Enouf                                                                                                                                                                                                                                                                                                                                                                                                                                                                                                                                                                                                                                                                                                                                                                             |
| EPI_ISL_7437787                                                                                                                                                                                                                                                                                                                                                                                                                                                                                                                                                                                                                                                                                                                                                                                                                                                                                                                                                                                                                                                                                                                                                                                                                                                                                                                                                                                                                                                                                                                                                                                                                                                                                                                                                                                                                                                                                                                                                                                                                                                                                                                                                                                                                                                                                                                                                                                                                                                                                                                                                                                                                                                                                                                                                                                                                                                                                                                                                                                                                                                                                                                                                                                                                                                                                                                                                                                                                                                                                                                                                                                                                                                                                                                                                                                                                                                                                                                                                                                                                                                                                                                                                                                                                                                                                                                                                                                                                                                                                                                                                                                                                                                                                                                                                                                                                                                                                                                                                                                                                                                                                                                                                                                                                                                                                                                                                                                                                                                                                                                                                                                                                                                                                                                                                                                                                                                                                                                                                                                                                                                                                                                                                                                                                                                                                                                                                                                                                                                                                                                                                                                                                                                                                                                                                                                                                                                                                                                                                                                                                                                                                                                                                                                                                                                                                                                                                                                                                                                                                                                                                                                                                                                                                                                                                                                                                                                                                                                                                                                                                                                                                                                                                                                                                                                                                                                                                                                                                                                                                                                                                                                                                                                                                                                                                                                                                                                                                                                                                                                                                                                                                                                                                                                                                                                                                                                                                                                                                                                                                                                                                                                                                                                                                                                                                                                                                                                                                                                                                                                                                                                                                                                                                                                                                                                                                                                                                                                                                                                                                                                                                                                                                                                                                                                                                                                                                                                                                                                                                                                                                                                                                                                                                                                                                                                                                                                                                                                                                                                                                                                                                                                                                                                                                                                                                                                         | Labor Prof. Dr. G. Enders MVZ GbR                                                                            | Robert Koch Institute                                                                                                |                                                                                                                                                                                                                                                                                                                                                                                                                                                                                                                                                                                                                                                                                                                                                                                                                                                                                                                                                                                                                                                                 |
| EPI_ISL_7450035, EPI_ISL_7450728                                                                                                                                                                                                                                                                                                                                                                                                                                                                                                                                                                                                                                                                                                                                                                                                                                                                                                                                                                                                                                                                                                                                                                                                                                                                                                                                                                                                                                                                                                                                                                                                                                                                                                                                                                                                                                                                                                                                                                                                                                                                                                                                                                                                                                                                                                                                                                                                                                                                                                                                                                                                                                                                                                                                                                                                                                                                                                                                                                                                                                                                                                                                                                                                                                                                                                                                                                                                                                                                                                                                                                                                                                                                                                                                                                                                                                                                                                                                                                                                                                                                                                                                                                                                                                                                                                                                                                                                                                                                                                                                                                                                                                                                                                                                                                                                                                                                                                                                                                                                                                                                                                                                                                                                                                                                                                                                                                                                                                                                                                                                                                                                                                                                                                                                                                                                                                                                                                                                                                                                                                                                                                                                                                                                                                                                                                                                                                                                                                                                                                                                                                                                                                                                                                                                                                                                                                                                                                                                                                                                                                                                                                                                                                                                                                                                                                                                                                                                                                                                                                                                                                                                                                                                                                                                                                                                                                                                                                                                                                                                                                                                                                                                                                                                                                                                                                                                                                                                                                                                                                                                                                                                                                                                                                                                                                                                                                                                                                                                                                                                                                                                                                                                                                                                                                                                                                                                                                                                                                                                                                                                                                                                                                                                                                                                                                                                                                                                                                                                                                                                                                                                                                                                                                                                                                                                                                                                                                                                                                                                                                                                                                                                                                                                                                                                                                                                                                                                                                                                                                                                                                                                                                                                                                                                                                                                                                                                                                                                                                                                                                                                                                                                                                                                                                                                                                        | Laboratoire BIORANCE                                                                                         | CHU Pontchaillou                                                                                                     | DE TAYRAC Marie; DENOUAL Florent; ETCHERRY Amandine; FEBREAU Christine; GALIBERT Marie Dominique; GROLLIER Claire; JAGLINE Steven; PROMIER Charlotte; QUENET Benjamin; SASSI Mohamed; THIBAUT Vincent                                                                                                                                                                                                                                                                                                                                                                                                                                                                                                                                                                                                                                                                                                                                                                                                                                                           |
| EPI_ISL_6971091                                                                                                                                                                                                                                                                                                                                                                                                                                                                                                                                                                                                                                                                                                                                                                                                                                                                                                                                                                                                                                                                                                                                                                                                                                                                                                                                                                                                                                                                                                                                                                                                                                                                                                                                                                                                                                                                                                                                                                                                                                                                                                                                                                                                                                                                                                                                                                                                                                                                                                                                                                                                                                                                                                                                                                                                                                                                                                                                                                                                                                                                                                                                                                                                                                                                                                                                                                                                                                                                                                                                                                                                                                                                                                                                                                                                                                                                                                                                                                                                                                                                                                                                                                                                                                                                                                                                                                                                                                                                                                                                                                                                                                                                                                                                                                                                                                                                                                                                                                                                                                                                                                                                                                                                                                                                                                                                                                                                                                                                                                                                                                                                                                                                                                                                                                                                                                                                                                                                                                                                                                                                                                                                                                                                                                                                                                                                                                                                                                                                                                                                                                                                                                                                                                                                                                                                                                                                                                                                                                                                                                                                                                                                                                                                                                                                                                                                                                                                                                                                                                                                                                                                                                                                                                                                                                                                                                                                                                                                                                                                                                                                                                                                                                                                                                                                                                                                                                                                                                                                                                                                                                                                                                                                                                                                                                                                                                                                                                                                                                                                                                                                                                                                                                                                                                                                                                                                                                                                                                                                                                                                                                                                                                                                                                                                                                                                                                                                                                                                                                                                                                                                                                                                                                                                                                                                                                                                                                                                                                                                                                                                                                                                                                                                                                                                                                                                                                                                                                                                                                                                                                                                                                                                                                                                                                                                                                                                                                                                                                                                                                                                                                                                                                                                                                                                                                                         | Laboratoire analyse med                                                                                      | LABORIZON CENTRE BIOGROUP                                                                                            | HAGUENOER EVE; HOLSTEIN ANNE; JIMENEZ MELANIE; LEFLEUTER NICOLAS; POITRON GREGOIRE                                                                                                                                                                                                                                                                                                                                                                                                                                                                                                                                                                                                                                                                                                                                                                                                                                                                                                                                                                              |
| EPI_ISL_7309168                                                                                                                                                                                                                                                                                                                                                                                                                                                                                                                                                                                                                                                                                                                                                                                                                                                                                                                                                                                                                                                                                                                                                                                                                                                                                                                                                                                                                                                                                                                                                                                                                                                                                                                                                                                                                                                                                                                                                                                                                                                                                                                                                                                                                                                                                                                                                                                                                                                                                                                                                                                                                                                                                                                                                                                                                                                                                                                                                                                                                                                                                                                                                                                                                                                                                                                                                                                                                                                                                                                                                                                                                                                                                                                                                                                                                                                                                                                                                                                                                                                                                                                                                                                                                                                                                                                                                                                                                                                                                                                                                                                                                                                                                                                                                                                                                                                                                                                                                                                                                                                                                                                                                                                                                                                                                                                                                                                                                                                                                                                                                                                                                                                                                                                                                                                                                                                                                                                                                                                                                                                                                                                                                                                                                                                                                                                                                                                                                                                                                                                                                                                                                                                                                                                                                                                                                                                                                                                                                                                                                                                                                                                                                                                                                                                                                                                                                                                                                                                                                                                                                                                                                                                                                                                                                                                                                                                                                                                                                                                                                                                                                                                                                                                                                                                                                                                                                                                                                                                                                                                                                                                                                                                                                                                                                                                                                                                                                                                                                                                                                                                                                                                                                                                                                                                                                                                                                                                                                                                                                                                                                                                                                                                                                                                                                                                                                                                                                                                                                                                                                                                                                                                                                                                                                                                                                                                                                                                                                                                                                                                                                                                                                                                                                                                                                                                                                                                                                                                                                                                                                                                                                                                                                                                                                                                                                                                                                                                                                                                                                                                                                                                                                                                                                                                                                                                         | Laboratório Central de Saude Publica do Rio Grande do Sul/Centro Estadual de Vigilância em Saude             | Centro de Desenvolvimento Científico e Tecnológico (CDCT)/Centro Estadual de Vigilância em Saude                     | Alana Rossetti; Cláudia Maria Dornelles da Silva; Fernanda Marques Godinho; Larissa Vitoria da Silva; Ludmila Florenzano Baethgen; Miguel S Andrade.; Regina Bones Barcellos; Richard Steiner Salva; Tatiana Schaffer Gregianni                                                                                                                                                                                                                                                                                                                                                                                                                                                                                                                                                                                                                                                                                                                                                                                                                                 |
| EPI_ISL_7497691                                                                                                                                                                                                                                                                                                                                                                                                                                                                                                                                                                                                                                                                                                                                                                                                                                                                                                                                                                                                                                                                                                                                                                                                                                                                                                                                                                                                                                                                                                                                                                                                                                                                                                                                                                                                                                                                                                                                                                                                                                                                                                                                                                                                                                                                                                                                                                                                                                                                                                                                                                                                                                                                                                                                                                                                                                                                                                                                                                                                                                                                                                                                                                                                                                                                                                                                                                                                                                                                                                                                                                                                                                                                                                                                                                                                                                                                                                                                                                                                                                                                                                                                                                                                                                                                                                                                                                                                                                                                                                                                                                                                                                                                                                                                                                                                                                                                                                                                                                                                                                                                                                                                                                                                                                                                                                                                                                                                                                                                                                                                                                                                                                                                                                                                                                                                                                                                                                                                                                                                                                                                                                                                                                                                                                                                                                                                                                                                                                                                                                                                                                                                                                                                                                                                                                                                                                                                                                                                                                                                                                                                                                                                                                                                                                                                                                                                                                                                                                                                                                                                                                                                                                                                                                                                                                                                                                                                                                                                                                                                                                                                                                                                                                                                                                                                                                                                                                                                                                                                                                                                                                                                                                                                                                                                                                                                                                                                                                                                                                                                                                                                                                                                                                                                                                                                                                                                                                                                                                                                                                                                                                                                                                                                                                                                                                                                                                                                                                                                                                                                                                                                                                                                                                                                                                                                                                                                                                                                                                                                                                                                                                                                                                                                                                                                                                                                                                                                                                                                                                                                                                                                                                                                                                                                                                                                                                                                                                                                                                                                                                                                                                                                                                                                                                                                                                                         | Laboratory Corporation of America                                                                            | Centers for Disease Control and Prevention Division of Viral Diseases, Pathogen Discovery                            | Amanda Douglas; Amanda Suchanek; Andrea Throop; Ayla Burns; Benjamin Rambo-Martin; Bobbi Croy; Brian Krueger; Brian Norvell; Christopher Gulvick; Christos Petropoulos; Clinton Paden; Craig Lukasik; Dakota Howard; Debbie Boles; Dhvani Batra; Duncan MacCannell; Eyad Almasri; Goran Stevovic; Howard Engler; Hrushikesh Deshmukh; Jake Humphrey; Jana Schroth; Jason Caravas; Joe Voshell; John Pruitt; Jonathan Melzer; Jonathan Williams; Kimberly Wagner; Kristine Lacey; Lax Yyer; Lisa Pfefferle; Lyndon Tilton; Manoj Jain; Marcia Eisenberg; Mary Cristobal; Mary Williamson; Matthew Robinson; Matthew Schmerer; Michael Levandoski; Mike Sapeta; Mindy Yuse; Minoq Agarwal; Mohan Kolli; Nuthwin Chalons; Oren Cohen; Peter Cook; Prashant Gupta; Qian Zeng; Rama Ghatt; Scott Ryan; Scott Sammons; Shatabhai Morrison; Stanley Letovsky; Steven Ragan; Suresh Selvaraju; Susan Countryman; Susan Hicks; Suzanne Dale; Thomas Urban; Tim Kuphal; Tricia Zwiefelhofer; Tymecia Kendall; Victoria Caban Figueroa; Vincent Drouillon; Yvette Unoaumhi |
| EPI_ISL_7567146                                                                                                                                                                                                                                                                                                                                                                                                                                                                                                                                                                                                                                                                                                                                                                                                                                                                                                                                                                                                                                                                                                                                                                                                                                                                                                                                                                                                                                                                                                                                                                                                                                                                                                                                                                                                                                                                                                                                                                                                                                                                                                                                                                                                                                                                                                                                                                                                                                                                                                                                                                                                                                                                                                                                                                                                                                                                                                                                                                                                                                                                                                                                                                                                                                                                                                                                                                                                                                                                                                                                                                                                                                                                                                                                                                                                                                                                                                                                                                                                                                                                                                                                                                                                                                                                                                                                                                                                                                                                                                                                                                                                                                                                                                                                                                                                                                                                                                                                                                                                                                                                                                                                                                                                                                                                                                                                                                                                                                                                                                                                                                                                                                                                                                                                                                                                                                                                                                                                                                                                                                                                                                                                                                                                                                                                                                                                                                                                                                                                                                                                                                                                                                                                                                                                                                                                                                                                                                                                                                                                                                                                                                                                                                                                                                                                                                                                                                                                                                                                                                                                                                                                                                                                                                                                                                                                                                                                                                                                                                                                                                                                                                                                                                                                                                                                                                                                                                                                                                                                                                                                                                                                                                                                                                                                                                                                                                                                                                                                                                                                                                                                                                                                                                                                                                                                                                                                                                                                                                                                                                                                                                                                                                                                                                                                                                                                                                                                                                                                                                                                                                                                                                                                                                                                                                                                                                                                                                                                                                                                                                                                                                                                                                                                                                                                                                                                                                                                                                                                                                                                                                                                                                                                                                                                                                                                                                                                                                                                                                                                                                                                                                                                                                                                                                                                                                                         | Laboratory of Clinical Microbiology, Virology and Biomechanics, ASST Fatebenefratelli Sacco - Sacco Hospital | Laboratory of Clinical Microbiology, Virology and Biomechanics, ASST Fatebenefratelli Sacco - Sacco Hospital         | Alberto Urzo; Fiorenza Bracchitta; Valeria Micheli                                                                                                                                                                                                                                                                                                                                                                                                                                                                                                                                                                                                                                                                                                                                                                                                                                                                                                                                                                                                              |
| EPI_ISL_7220176                                                                                                                                                                                                                                                                                                                                                                                                                                                                                                                                                                                                                                                                                                                                                                                                                                                                                                                                                                                                                                                                                                                                                                                                                                                                                                                                                                                                                                                                                                                                                                                                                                                                                                                                                                                                                                                                                                                                                                                                                                                                                                                                                                                                                                                                                                                                                                                                                                                                                                                                                                                                                                                                                                                                                                                                                                                                                                                                                                                                                                                                                                                                                                                                                                                                                                                                                                                                                                                                                                                                                                                                                                                                                                                                                                                                                                                                                                                                                                                                                                                                                                                                                                                                                                                                                                                                                                                                                                                                                                                                                                                                                                                                                                                                                                                                                                                                                                                                                                                                                                                                                                                                                                                                                                                                                                                                                                                                                                                                                                                                                                                                                                                                                                                                                                                                                                                                                                                                                                                                                                                                                                                                                                                                                                                                                                                                                                                                                                                                                                                                                                                                                                                                                                                                                                                                                                                                                                                                                                                                                                                                                                                                                                                                                                                                                                                                                                                                                                                                                                                                                                                                                                                                                                                                                                                                                                                                                                                                                                                                                                                                                                                                                                                                                                                                                                                                                                                                                                                                                                                                                                                                                                                                                                                                                                                                                                                                                                                                                                                                                                                                                                                                                                                                                                                                                                                                                                                                                                                                                                                                                                                                                                                                                                                                                                                                                                                                                                                                                                                                                                                                                                                                                                                                                                                                                                                                                                                                                                                                                                                                                                                                                                                                                                                                                                                                                                                                                                                                                                                                                                                                                                                                                                                                                                                                                                                                                                                                                                                                                                                                                                                                                                                                                                                                                                                         | Laboratory of Clinical Virology Heraklion Crete                                                              | Laboratory of Clinical Virology Heraklion Crete                                                                      | Alexandros Zafiroopoulos; George Sourvinos                                                                                                                                                                                                                                                                                                                                                                                                                                                                                                                                                                                                                                                                                                                                                                                                                                                                                                                                                                                                                      |
| EPI_ISL_7651286, EPI_ISL_7651287, EPI_ISL_7651288, EPI_ISL_7651289                                                                                                                                                                                                                                                                                                                                                                                                                                                                                                                                                                                                                                                                                                                                                                                                                                                                                                                                                                                                                                                                                                                                                                                                                                                                                                                                                                                                                                                                                                                                                                                                                                                                                                                                                                                                                                                                                                                                                                                                                                                                                                                                                                                                                                                                                                                                                                                                                                                                                                                                                                                                                                                                                                                                                                                                                                                                                                                                                                                                                                                                                                                                                                                                                                                                                                                                                                                                                                                                                                                                                                                                                                                                                                                                                                                                                                                                                                                                                                                                                                                                                                                                                                                                                                                                                                                                                                                                                                                                                                                                                                                                                                                                                                                                                                                                                                                                                                                                                                                                                                                                                                                                                                                                                                                                                                                                                                                                                                                                                                                                                                                                                                                                                                                                                                                                                                                                                                                                                                                                                                                                                                                                                                                                                                                                                                                                                                                                                                                                                                                                                                                                                                                                                                                                                                                                                                                                                                                                                                                                                                                                                                                                                                                                                                                                                                                                                                                                                                                                                                                                                                                                                                                                                                                                                                                                                                                                                                                                                                                                                                                                                                                                                                                                                                                                                                                                                                                                                                                                                                                                                                                                                                                                                                                                                                                                                                                                                                                                                                                                                                                                                                                                                                                                                                                                                                                                                                                                                                                                                                                                                                                                                                                                                                                                                                                                                                                                                                                                                                                                                                                                                                                                                                                                                                                                                                                                                                                                                                                                                                                                                                                                                                                                                                                                                                                                                                                                                                                                                                                                                                                                                                                                                                                                                                                                                                                                                                                                                                                                                                                                                                                                                                                                                                                                      | Laboratory of Molecular Biology and Cancer Immunology, Faculty of Sciences, Lebanese University              | Microbial Pathogenomics Lab - LAU                                                                                    | Allissar Zaghlout; Bassam Badran; Fadi Abdel Sater; Georgi Merhi; Jad Koweys; Nada Ghosn; Rawan Makki; Sima tokajian                                                                                                                                                                                                                                                                                                                                                                                                                                                                                                                                                                                                                                                                                                                                                                                                                                                                                                                                            |
| EPI_ISL_7264143                                                                                                                                                                                                                                                                                                                                                                                                                                                                                                                                                                                                                                                                                                                                                                                                                                                                                                                                                                                                                                                                                                                                                                                                                                                                                                                                                                                                                                                                                                                                                                                                                                                                                                                                                                                                                                                                                                                                                                                                                                                                                                                                                                                                                                                                                                                                                                                                                                                                                                                                                                                                                                                                                                                                                                                                                                                                                                                                                                                                                                                                                                                                                                                                                                                                                                                                                                                                                                                                                                                                                                                                                                                                                                                                                                                                                                                                                                                                                                                                                                                                                                                                                                                                                                                                                                                                                                                                                                                                                                                                                                                                                                                                                                                                                                                                                                                                                                                                                                                                                                                                                                                                                                                                                                                                                                                                                                                                                                                                                                                                                                                                                                                                                                                                                                                                                                                                                                                                                                                                                                                                                                                                                                                                                                                                                                                                                                                                                                                                                                                                                                                                                                                                                                                                                                                                                                                                                                                                                                                                                                                                                                                                                                                                                                                                                                                                                                                                                                                                                                                                                                                                                                                                                                                                                                                                                                                                                                                                                                                                                                                                                                                                                                                                                                                                                                                                                                                                                                                                                                                                                                                                                                                                                                                                                                                                                                                                                                                                                                                                                                                                                                                                                                                                                                                                                                                                                                                                                                                                                                                                                                                                                                                                                                                                                                                                                                                                                                                                                                                                                                                                                                                                                                                                                                                                                                                                                                                                                                                                                                                                                                                                                                                                                                                                                                                                                                                                                                                                                                                                                                                                                                                                                                                                                                                                                                                                                                                                                                                                                                                                                                                                                                                                                                                                                                                         | Lahey Hospital                                                                                               | New England Biolabs                                                                                                  | Abel, G.; B.W.; C.J.; Elfahal, M.; Flynn; Heim, K.; Karolides, M.; L. and Langhorst; Leger, P.; Michaels, L.; Pinet, K.; Skelton, T.; Sun                                                                                                                                                                                                                                                                                                                                                                                                                                                                                                                                                                                                                                                                                                                                                                                                                                                                                                                       |
| EPI_ISL_7543847, EPI_ISL_7543913, EPI_ISL_7543935, EPI_ISL_7543949, EPI_ISL_7543960, EPI_ISL_7544508, EPI_ISL_7544601, EPI_ISL_7544676, EPI_ISL_7544705                                                                                                                                                                                                                                                                                                                                                                                                                                                                                                                                                                                                                                                                                                                                                                                                                                                                                                                                                                                                                                                                                                                                                                                                                                                                                                                                                                                                                                                                                                                                                                                                                                                                                                                                                                                                                                                                                                                                                                                                                                                                                                                                                                                                                                                                                                                                                                                                                                                                                                                                                                                                                                                                                                                                                                                                                                                                                                                                                                                                                                                                                                                                                                                                                                                                                                                                                                                                                                                                                                                                                                                                                                                                                                                                                                                                                                                                                                                                                                                                                                                                                                                                                                                                                                                                                                                                                                                                                                                                                                                                                                                                                                                                                                                                                                                                                                                                                                                                                                                                                                                                                                                                                                                                                                                                                                                                                                                                                                                                                                                                                                                                                                                                                                                                                                                                                                                                                                                                                                                                                                                                                                                                                                                                                                                                                                                                                                                                                                                                                                                                                                                                                                                                                                                                                                                                                                                                                                                                                                                                                                                                                                                                                                                                                                                                                                                                                                                                                                                                                                                                                                                                                                                                                                                                                                                                                                                                                                                                                                                                                                                                                                                                                                                                                                                                                                                                                                                                                                                                                                                                                                                                                                                                                                                                                                                                                                                                                                                                                                                                                                                                                                                                                                                                                                                                                                                                                                                                                                                                                                                                                                                                                                                                                                                                                                                                                                                                                                                                                                                                                                                                                                                                                                                                                                                                                                                                                                                                                                                                                                                                                                                                                                                                                                                                                                                                                                                                                                                                                                                                                                                                                                                                                                                                                                                                                                                                                                                                                                                                                                                                                                                                                                                 | see above                                                                                                    | Lancet                                                                                                               | NHLS/UCT<br>Arash Iranzadeh; Bruna Galvao; Carolyn Williamson; Deelan Doolabh; Diana Hardie; Gert Marais; Innocent Mudau; Luicer Olubayo; Lynn Tyers; Marvin Hsiao; Nokuzola Mbhele; Rageema Joseph; Stephen Korsman                                                                                                                                                                                                                                                                                                                                                                                                                                                                                                                                                                                                                                                                                                                                                                                                                                            |
| EPI_ISL_6913991, EPI_ISL_6913992, EPI_ISL_6913993, EPI_ISL_6913994, EPI_ISL_6913995, EPI_ISL_6913996, EPI_ISL_6913997, EPI_ISL_6913998, EPI_ISL_6913999, EPI_ISL_6914000, EPI_ISL_6914001, EPI_ISL_6914002, EPI_ISL_6914003, EPI_ISL_6914004, EPI_ISL_6914005, EPI_ISL_6914006, EPI_ISL_6914007                                                                                                                                                                                                                                                                                                                                                                                                                                                                                                                                                                                                                                                                                                                                                                                                                                                                                                                                                                                                                                                                                                                                                                                                                                                                                                                                                                                                                                                                                                                                                                                                                                                                                                                                                                                                                                                                                                                                                                                                                                                                                                                                                                                                                                                                                                                                                                                                                                                                                                                                                                                                                                                                                                                                                                                                                                                                                                                                                                                                                                                                                                                                                                                                                                                                                                                                                                                                                                                                                                                                                                                                                                                                                                                                                                                                                                                                                                                                                                                                                                                                                                                                                                                                                                                                                                                                                                                                                                                                                                                                                                                                                                                                                                                                                                                                                                                                                                                                                                                                                                                                                                                                                                                                                                                                                                                                                                                                                                                                                                                                                                                                                                                                                                                                                                                                                                                                                                                                                                                                                                                                                                                                                                                                                                                                                                                                                                                                                                                                                                                                                                                                                                                                                                                                                                                                                                                                                                                                                                                                                                                                                                                                                                                                                                                                                                                                                                                                                                                                                                                                                                                                                                                                                                                                                                                                                                                                                                                                                                                                                                                                                                                                                                                                                                                                                                                                                                                                                                                                                                                                                                                                                                                                                                                                                                                                                                                                                                                                                                                                                                                                                                                                                                                                                                                                                                                                                                                                                                                                                                                                                                                                                                                                                                                                                                                                                                                                                                                                                                                                                                                                                                                                                                                                                                                                                                                                                                                                                                                                                                                                                                                                                                                                                                                                                                                                                                                                                                                                                                                                                                                                                                                                                                                                                                                                                                                                                                                                                                                                                                         | see above                                                                                                    | Lancet Laboratories                                                                                                  | National Institute for Communicable Diseases of the National Health Laboratory Service<br>Amoako DG; Bhiman JN; Everatt J; Ismail A; Mahlangu B; Mnguni A; Mohale T; Ntuli N; Scheepers C; Wolter N                                                                                                                                                                                                                                                                                                                                                                                                                                                                                                                                                                                                                                                                                                                                                                                                                                                             |
| EPI_ISL_7420297, EPI_ISL_7420298, EPI_ISL_7420371, EPI_ISL_7420381                                                                                                                                                                                                                                                                                                                                                                                                                                                                                                                                                                                                                                                                                                                                                                                                                                                                                                                                                                                                                                                                                                                                                                                                                                                                                                                                                                                                                                                                                                                                                                                                                                                                                                                                                                                                                                                                                                                                                                                                                                                                                                                                                                                                                                                                                                                                                                                                                                                                                                                                                                                                                                                                                                                                                                                                                                                                                                                                                                                                                                                                                                                                                                                                                                                                                                                                                                                                                                                                                                                                                                                                                                                                                                                                                                                                                                                                                                                                                                                                                                                                                                                                                                                                                                                                                                                                                                                                                                                                                                                                                                                                                                                                                                                                                                                                                                                                                                                                                                                                                                                                                                                                                                                                                                                                                                                                                                                                                                                                                                                                                                                                                                                                                                                                                                                                                                                                                                                                                                                                                                                                                                                                                                                                                                                                                                                                                                                                                                                                                                                                                                                                                                                                                                                                                                                                                                                                                                                                                                                                                                                                                                                                                                                                                                                                                                                                                                                                                                                                                                                                                                                                                                                                                                                                                                                                                                                                                                                                                                                                                                                                                                                                                                                                                                                                                                                                                                                                                                                                                                                                                                                                                                                                                                                                                                                                                                                                                                                                                                                                                                                                                                                                                                                                                                                                                                                                                                                                                                                                                                                                                                                                                                                                                                                                                                                                                                                                                                                                                                                                                                                                                                                                                                                                                                                                                                                                                                                                                                                                                                                                                                                                                                                                                                                                                                                                                                                                                                                                                                                                                                                                                                                                                                                                                                                                                                                                                                                                                                                                                                                                                                                                                                                                                                                                      | Landesgesundheitsamt Baden-Württemberg                                                                       | Robert Koch Institute                                                                                                |                                                                                                                                                                                                                                                                                                                                                                                                                                                                                                                                                                                                                                                                                                                                                                                                                                                                                                                                                                                                                                                                 |
| EPI_ISL_7543863                                                                                                                                                                                                                                                                                                                                                                                                                                                                                                                                                                                                                                                                                                                                                                                                                                                                                                                                                                                                                                                                                                                                                                                                                                                                                                                                                                                                                                                                                                                                                                                                                                                                                                                                                                                                                                                                                                                                                                                                                                                                                                                                                                                                                                                                                                                                                                                                                                                                                                                                                                                                                                                                                                                                                                                                                                                                                                                                                                                                                                                                                                                                                                                                                                                                                                                                                                                                                                                                                                                                                                                                                                                                                                                                                                                                                                                                                                                                                                                                                                                                                                                                                                                                                                                                                                                                                                                                                                                                                                                                                                                                                                                                                                                                                                                                                                                                                                                                                                                                                                                                                                                                                                                                                                                                                                                                                                                                                                                                                                                                                                                                                                                                                                                                                                                                                                                                                                                                                                                                                                                                                                                                                                                                                                                                                                                                                                                                                                                                                                                                                                                                                                                                                                                                                                                                                                                                                                                                                                                                                                                                                                                                                                                                                                                                                                                                                                                                                                                                                                                                                                                                                                                                                                                                                                                                                                                                                                                                                                                                                                                                                                                                                                                                                                                                                                                                                                                                                                                                                                                                                                                                                                                                                                                                                                                                                                                                                                                                                                                                                                                                                                                                                                                                                                                                                                                                                                                                                                                                                                                                                                                                                                                                                                                                                                                                                                                                                                                                                                                                                                                                                                                                                                                                                                                                                                                                                                                                                                                                                                                                                                                                                                                                                                                                                                                                                                                                                                                                                                                                                                                                                                                                                                                                                                                                                                                                                                                                                                                                                                                                                                                                                                                                                                                                                                                         | Langa Clinic wc LAN                                                                                          | NHLS/UCT                                                                                                             | Arash Iranzadeh; Bruna Galvao; Carolyn Williamson; Deelan Doolabh; Diana Hardie; Gert Marais; Innocent Mudau; Luicer Olubayo; Lynn Tyers; Marvin Hsiao; Nokuzola Mbhele; Rageema Joseph; Stephen Korsman                                                                                                                                                                                                                                                                                                                                                                                                                                                                                                                                                                                                                                                                                                                                                                                                                                                        |
| EPI_ISL_7620900, EPI_ISL_7621182, EPI_ISL_7621503, EPI_ISL_7621817                                                                                                                                                                                                                                                                                                                                                                                                                                                                                                                                                                                                                                                                                                                                                                                                                                                                                                                                                                                                                                                                                                                                                                                                                                                                                                                                                                                                                                                                                                                                                                                                                                                                                                                                                                                                                                                                                                                                                                                                                                                                                                                                                                                                                                                                                                                                                                                                                                                                                                                                                                                                                                                                                                                                                                                                                                                                                                                                                                                                                                                                                                                                                                                                                                                                                                                                                                                                                                                                                                                                                                                                                                                                                                                                                                                                                                                                                                                                                                                                                                                                                                                                                                                                                                                                                                                                                                                                                                                                                                                                                                                                                                                                                                                                                                                                                                                                                                                                                                                                                                                                                                                                                                                                                                                                                                                                                                                                                                                                                                                                                                                                                                                                                                                                                                                                                                                                                                                                                                                                                                                                                                                                                                                                                                                                                                                                                                                                                                                                                                                                                                                                                                                                                                                                                                                                                                                                                                                                                                                                                                                                                                                                                                                                                                                                                                                                                                                                                                                                                                                                                                                                                                                                                                                                                                                                                                                                                                                                                                                                                                                                                                                                                                                                                                                                                                                                                                                                                                                                                                                                                                                                                                                                                                                                                                                                                                                                                                                                                                                                                                                                                                                                                                                                                                                                                                                                                                                                                                                                                                                                                                                                                                                                                                                                                                                                                                                                                                                                                                                                                                                                                                                                                                                                                                                                                                                                                                                                                                                                                                                                                                                                                                                                                                                                                                                                                                                                                                                                                                                                                                                                                                                                                                                                                                                                                                                                                                                                                                                                                                                                                                                                                                                                                                                                      | Laverty Pathology                                                                                            | NSW Health Pathology - Institute of Clinical Pathology and Medical Research; Westmead Hospital; University of Sydney | Arnott A.; Draper J.; Gall M.; Martinez E.; Rockett R.; Sintchenko V.; on behalf of ICPMR                                                                                                                                                                                                                                                                                                                                                                                                                                                                                                                                                                                                                                                                                                                                                                                                                                                                                                                                                                       |
| EPI_ISL_7348417, EPI_ISL_7348427                                                                                                                                                                                                                                                                                                                                                                                                                                                                                                                                                                                                                                                                                                                                                                                                                                                                                                                                                                                                                                                                                                                                                                                                                                                                                                                                                                                                                                                                                                                                                                                                                                                                                                                                                                                                                                                                                                                                                                                                                                                                                                                                                                                                                                                                                                                                                                                                                                                                                                                                                                                                                                                                                                                                                                                                                                                                                                                                                                                                                                                                                                                                                                                                                                                                                                                                                                                                                                                                                                                                                                                                                                                                                                                                                                                                                                                                                                                                                                                                                                                                                                                                                                                                                                                                                                                                                                                                                                                                                                                                                                                                                                                                                                                                                                                                                                                                                                                                                                                                                                                                                                                                                                                                                                                                                                                                                                                                                                                                                                                                                                                                                                                                                                                                                                                                                                                                                                                                                                                                                                                                                                                                                                                                                                                                                                                                                                                                                                                                                                                                                                                                                                                                                                                                                                                                                                                                                                                                                                                                                                                                                                                                                                                                                                                                                                                                                                                                                                                                                                                                                                                                                                                                                                                                                                                                                                                                                                                                                                                                                                                                                                                                                                                                                                                                                                                                                                                                                                                                                                                                                                                                                                                                                                                                                                                                                                                                                                                                                                                                                                                                                                                                                                                                                                                                                                                                                                                                                                                                                                                                                                                                                                                                                                                                                                                                                                                                                                                                                                                                                                                                                                                                                                                                                                                                                                                                                                                                                                                                                                                                                                                                                                                                                                                                                                                                                                                                                                                                                                                                                                                                                                                                                                                                                                                                                                                                                                                                                                                                                                                                                                                                                                                                                                                                                                        | Lifebrain Covid Labor GmbH                                                                                   | Lifebrain Covid Labor GmbH                                                                                           | Filip Sima                                                                                                                                                                                                                                                                                                                                                                                                                                                                                                                                                                                                                                                                                                                                                                                                                                                                                                                                                                                                                                                      |
| EPI_ISL_6821008, EPI_ISL_6916148, EPI_ISL_7023724, EPI_ISL_7144808, EPI_ISL_7144986, EPI_ISL_7148837, EPI_ISL_7187307, EPI_ISL_7200868, EPI_ISL_7290346, EPI_ISL_7293790, EPI_ISL_7293812, EPI_ISL_7293816, EPI_ISL_7293841, EPI_ISL_7293869, EPI_ISL_7293903, EPI_ISL_7294032, EPI_ISL_7294185, EPI_ISL_7296873, EPI_ISL_7301592, EPI_ISL_7301667, EPI_ISL_7305287, EPI_ISL_7344013, EPI_ISL_7344598, EPI_ISL_7344677, EPI_ISL_7344684, EPI_ISL_7351048, EPI_ISL_7351423, EPI_ISL_7351700, EPI_ISL_7352100, EPI_ISL_7352101, EPI_ISL_7352102, EPI_ISL_7352103, EPI_ISL_7352104, EPI_ISL_7352105, EPI_ISL_7352106, EPI_ISL_7352107, EPI_ISL_7352108, EPI_ISL_7352109, EPI_ISL_7352110, EPI_ISL_7352111, EPI_ISL_7352112, EPI_ISL_7352113, EPI_ISL_7352114, EPI_ISL_7352115, EPI_ISL_7352116, EPI_ISL_7352117, EPI_ISL_7352118, EPI_ISL_7352119, EPI_ISL_7352120, EPI_ISL_7352121, EPI_ISL_7352122, EPI_ISL_7352123, EPI_ISL_7352124, EPI_ISL_7352125, EPI_ISL_7352126, EPI_ISL_7352127, EPI_ISL_7352128, EPI_ISL_7352129, EPI_ISL_7352130, EPI_ISL_7352131, EPI_ISL_7352132, EPI_ISL_7352133, EPI_ISL_7352134, EPI_ISL_7352135, EPI_ISL_7352136, EPI_ISL_7352137, EPI_ISL_7352138, EPI_ISL_7352139, EPI_ISL_7352140, EPI_ISL_7352141, EPI_ISL_7352142, EPI_ISL_7352143, EPI_ISL_7352144, EPI_ISL_7352145, EPI_ISL_7352146, EPI_ISL_7352147, EPI_ISL_7352148, EPI_ISL_7352149, EPI_ISL_7352150, EPI_ISL_7352151, EPI_ISL_7352152, EPI_ISL_7352153, EPI_ISL_7352154, EPI_ISL_7352155, EPI_ISL_7352156, EPI_ISL_7352157, EPI_ISL_7352158, EPI_ISL_7352159, EPI_ISL_7352160, EPI_ISL_7352161, EPI_ISL_7352162, EPI_ISL_7352163, EPI_ISL_7352164, EPI_ISL_7352165, EPI_ISL_7352166, EPI_ISL_7352167, EPI_ISL_7352168, EPI_ISL_7352169, EPI_ISL_7352170, EPI_ISL_7352171, EPI_ISL_7352172, EPI_ISL_7352173, EPI_ISL_7352174, EPI_ISL_7352175, EPI_ISL_7352176, EPI_ISL_7352177, EPI_ISL_7352178, EPI_ISL_7352179, EPI_ISL_7352180, EPI_ISL_7352181, EPI_ISL_7352182, EPI_ISL_7352183, EPI_ISL_7352184, EPI_ISL_7352185, EPI_ISL_7352186, EPI_ISL_7352187, EPI_ISL_7352188, EPI_ISL_7352189, EPI_ISL_7352190, EPI_ISL_7352191, EPI_ISL_7352192, EPI_ISL_7352193, EPI_ISL_7352194, EPI_ISL_7352195, EPI_ISL_7352196, EPI_ISL_7352197, EPI_ISL_7352198, EPI_ISL_7352199, EPI_ISL_7352200, EPI_ISL_7352201, EPI_ISL_7352202, EPI_ISL_7352203, EPI_ISL_7352204, EPI_ISL_7352205, EPI_ISL_7352206, EPI_ISL_7352207, EPI_ISL_7352208, EPI_ISL_7352209, EPI_ISL_7352210, EPI_ISL_7352211, EPI_ISL_7352212, EPI_ISL_7352213, EPI_ISL_7352214, EPI_ISL_7352215, EPI_ISL_7352216, EPI_ISL_7352217, EPI_ISL_7352218, EPI_ISL_7352219, EPI_ISL_7352220, EPI_ISL_7352221, EPI_ISL_7352222, EPI_ISL_7352223, EPI_ISL_7352224, EPI_ISL_7352225, EPI_ISL_7352226, EPI_ISL_7352227, EPI_ISL_7352228, EPI_ISL_7352229, EPI_ISL_7352230, EPI_ISL_7352231, EPI_ISL_7352232, EPI_ISL_7352233, EPI_ISL_7352234, EPI_ISL_7352235, EPI_ISL_7352236, EPI_ISL_7352237, EPI_ISL_7352238, EPI_ISL_7352239, EPI_ISL_7352240, EPI_ISL_7352241, EPI_ISL_7352242, EPI_ISL_7352243, EPI_ISL_7352244, EPI_ISL_7352245, EPI_ISL_7352246, EPI_ISL_7352247, EPI_ISL_7352248, EPI_ISL_7352249, EPI_ISL_7352250, EPI_ISL_7352251, EPI_ISL_7352252, EPI_ISL_7352253, EPI_ISL_7352254, EPI_ISL_7352255, EPI_ISL_7352256, EPI_ISL_7352257, EPI_ISL_7352258, EPI_ISL_7352259, EPI_ISL_7352260, EPI_ISL_7352261, EPI_ISL_7352262, EPI_ISL_7352263, EPI_ISL_7352264, EPI_ISL_7352265, EPI_ISL_7352266, EPI_ISL_7352267, EPI_ISL_7352268, EPI_ISL_7352269, EPI_ISL_7352270, EPI_ISL_7352271, EPI_ISL_7352272, EPI_ISL_7352273, EPI_ISL_7352274, EPI_ISL_7352275, EPI_ISL_7352276, EPI_ISL_7352277, EPI_ISL_7352278, EPI_ISL_7352279, EPI_ISL_7352280, EPI_ISL_7352281, EPI_ISL_7352282, EPI_ISL_7352283, EPI_ISL_7352284, EPI_ISL_7352285, EPI_ISL_7352286, EPI_ISL_7352287, EPI_ISL_7352288, EPI_ISL_7352289, EPI_ISL_7352290, EPI_ISL_7352291, EPI_ISL_7352292, EPI_ISL_7352293, EPI_ISL_7352294, EPI_ISL_7352295, EPI_ISL_7352296, EPI_ISL_7352297, EPI_ISL_7352298, EPI_ISL_7352299, EPI_ISL_7352300, EPI_ISL_7352301, EPI_ISL_7352302, EPI_ISL_7352303, EPI_ISL_7352304, EPI_ISL_7352305, EPI_ISL_7352306, EPI_ISL_7352307, EPI_ISL_7352308, EPI_ISL_7352309, EPI_ISL_7352310, EPI_ISL_7352311, EPI_ISL_7352312, EPI_ISL_7352313, EPI_ISL_7352314, EPI_ISL_7352315, EPI_ISL_7352316, EPI_ISL_7352317, EPI_ISL_7352318, EPI_ISL_7352319, EPI_ISL_7352320, EPI_ISL_7352321, EPI_ISL_7352322, EPI_ISL_7352323, EPI_ISL_7352324, EPI_ISL_7352325, EPI_ISL_7352326, EPI_ISL_7352327, EPI_ISL_7352328, EPI_ISL_7352329, EPI_ISL_7352330, EPI_ISL_7352331, EPI_ISL_7352332, EPI_ISL_7352333, EPI_ISL_7352334, EPI_ISL_7352335, EPI_ISL_7352336, EPI_ISL_7352337, EPI_ISL_7352338, EPI_ISL_7352339, EPI_ISL_7352340, EPI_ISL_7352341, EPI_ISL_7352342, EPI_ISL_7352343, EPI_ISL_7352344, EPI_ISL_7352345, EPI_ISL_7352346, EPI_ISL_7352347, EPI_ISL_7352348, EPI_ISL_7352349, EPI_ISL_7352350, EPI_ISL_7352351, EPI_ISL_7352352, EPI_ISL_7352353, EPI_ISL_7352354, EPI_ISL_7352355, EPI_ISL_7352356, EPI_ISL_7352357, EPI_ISL_7352358, EPI_ISL_7352359, EPI_ISL_7352360, EPI_ISL_7352361, EPI_ISL_7352362, EPI_ISL_7352363, EPI_ISL_7352364, EPI_ISL_7352365, EPI_ISL_7352366, EPI_ISL_7352367, EPI_ISL_7352368, EPI_ISL_7352369, EPI_ISL_7352370, EPI_ISL_7352371, EPI_ISL_7352372, EPI_ISL_7352373, EPI_ISL_7352374, EPI_ISL_7352375, EPI_ISL_7352376, EPI_ISL_7352377, EPI_ISL_7352378, EPI_ISL_7352379, EPI_ISL_7352380, EPI_ISL_7352381, EPI_ISL_7352382, EPI_ISL_7352383, EPI_ISL_7352384, EPI_ISL_7352385, EPI_ISL_7352386, EPI_ISL_7352387, EPI_ISL_7352388, EPI_ISL_7352389, EPI_ISL_7352390, EPI_ISL_7352391, EPI_ISL_7352392, EPI_ISL_7352393, EPI_ISL_7352394, EPI_ISL_7352395, EPI_ISL_7352396, EPI_ISL_7352397, EPI_ISL_7352398, EPI_ISL_7352399, EPI_ISL_7352400, EPI_ISL_7352401, EPI_ISL_7352402, EPI_ISL_7352403, EPI_ISL_7352404, EPI_ISL_7352405, EPI_ISL_7352406, EPI_ISL_7352407, EPI_ISL_7352408, EPI_ISL_7352409, EPI_ISL_7352410, EPI_ISL_7352411, EPI_ISL_7352412, EPI_ISL_7352413, EPI_ISL_7352414, EPI_ISL_7352415, EPI_ISL_7352416, EPI_ISL_7352417, EPI_ISL_7352418, EPI_ISL_7352419, EPI_ISL_7352420, EPI_ISL_7352421, EPI_ISL_7352422, EPI_ISL_7352423, EPI_ISL_7352424, EPI_ISL_7352425, EPI_ISL_7352426, EPI_ISL_7352427, EPI_ISL_7352428, EPI_ISL_7352429, EPI_ISL_7352430, EPI_ISL_7352431, EPI_ISL_7352432, EPI_ISL_7352433, EPI_ISL_7352434, EPI_ISL_7352435, EPI_ISL_7352436, EPI_ISL_7352437, EPI_ISL_7352438, EPI_ISL_7352439, EPI_ISL_7352440, EPI_ISL_7352441, EPI_ISL_7352442, EPI_ISL_7352443, EPI_ISL_7352444, EPI_ISL_7352445, EPI_ISL_7352446, EPI_ISL_7352447, EPI_ISL_7352448, EPI_ISL_7352449, EPI_ISL_7352450, EPI_ISL_7352451, EPI_ISL_7352452, EPI_ISL_7352453, EPI_ISL_7352454, EPI_ISL_7352455, EPI_ISL_7352456, EPI_ISL_7352457, EPI_ISL_7352458, EPI_ISL_7352459, EPI_ISL_7352460, EPI_ISL_7352461, EPI_ISL_7352462, EPI_ISL_7352463, EPI_ISL_7352464, EPI_ISL_7352465, EPI_ISL_7352466, EPI_ISL_7352467, EPI_ISL_7352468, EPI_ISL_7352469, EPI_ISL_7352470, EPI_ISL_7352471, EPI_ISL_7352472, EPI_ISL_7352473, EPI_ISL_7352474, EPI_ISL_7352475, EPI_ISL_7352476, EPI_ISL_7352477, EPI_ISL_7352478, EPI_ISL_7352479, EPI_ISL_7352480, EPI_ISL_7352481, EPI_ISL_7352482, EPI_ISL_7352483, EPI_ISL_7352484, EPI_ISL_7352485, EPI_ISL_7352486, EPI_ISL_7352487, EPI_ISL_7352488, EPI_ISL_7352489, EPI_ISL_7352490, EPI_ISL_7352491, EPI_ISL_7352492, EPI_ISL_7352493, EPI_ISL_7352494, EPI_ISL_7352495, EPI_ISL_7352496, EPI_ISL_7352497, EPI_ISL_7352498, EPI_ISL_7352499, EPI_ISL_7352500, EPI_ISL_7352501, EPI_ISL_7352502, EPI_ISL_7352503, EPI_ISL_7352504, EPI_ISL_7352505, EPI_ISL_7352506, EPI_ISL_7352507, EPI_ISL_7352508, EPI_ISL_7352509, EPI_ISL_7352510, EPI_ISL_7352511, EPI_ISL_7352512, EPI_ISL_7352513, EPI_ISL_7352514, EPI_ISL_7352515, EPI_ISL_7352516, EPI_ISL_7352517, EPI_ISL_7352518, EPI_ISL_7352519, EPI_ISL_7352520, EPI_ISL_7352521, EPI_ISL_7352522, EPI_ISL_7352523, EPI_ISL_7352524, EPI_ISL_7352525, EPI_ISL_7352526, EPI_ISL_7352527, EPI_ISL_7352528, EPI_ISL_7352529, EPI_ISL_7352530, EPI_ISL_7352531, EPI_ISL_7352532, EPI_ISL_7352533, EPI_ISL_7352534, EPI_ISL_7352535, EPI_ISL_7352536, EPI_ISL_7352537, EPI_ISL_7352538, EPI_ISL_7352539, EPI_ISL_7352540, EPI_ISL_7352541, EPI_ISL_7352542, EPI_ISL_7352543, EPI_ISL_7352544, EPI_ISL_7352545, EPI_ISL_7352546, EPI_ISL_7352547, EPI_ISL_7352548, EPI_ISL_7352549, EPI_ISL_7352550, EPI_ISL_7352551, EPI_ISL_7352552, EPI_ISL_7352553, EPI_ISL_7352554, EPI_ISL_7352555, EPI_ISL_7352556, EPI_ISL_7352557, EPI_ISL_7352558, EPI_ISL_7352559, EPI_ISL_7352560, EPI_ISL_7352561, EPI_ISL_7352562, EPI_ISL_7352563, EPI_ISL_7352564, EPI_ISL_7352565, EPI_ISL_7352566, EPI_ISL_7352567, EPI_ISL_7352568, EPI_ISL_7352569, EPI_ISL_7352570, EPI_ISL_7352571, EPI_ISL_7352572, EPI_ISL_7352573, EPI_ISL_7352574, EPI_ISL_7352575, EPI_ISL_7352576, EPI_ISL_7352577, EPI_ISL_7352578, EPI_ISL_7352579, EPI_ISL_7352580, EPI_ISL_7352581, EPI_ISL_7352582, EPI_ISL_7352583, EPI_ISL_7352584, EPI_ISL_7352585, EPI_ISL_7352586, EPI_ISL_7352587, EPI_ISL_7352588, EPI_ISL_7352589, EPI_ISL_7352590, EPI_ISL_7352591, EPI_ISL_7352592, EPI_ISL_7352593, EPI_ISL_7352594, EPI_ISL_7352595, EPI_ISL_7352596, EPI_ISL_7352597, EPI_ISL_7352598, EPI_ISL_7352599, EPI_ISL_7352600, EPI_ISL_7352601, EPI_ISL_7352602, EPI_ISL_7352603, EPI_ISL_7352604, EPI_ISL_7352605, EPI_ISL_7352606, EPI_ISL_7352607, EPI_ISL_7352608, EPI_ISL_7352609, EPI_ISL_7352610, EPI_ISL_7352611, EPI_ISL_7352612, EPI_ISL_7352613, EPI_ISL_7352614, EPI_ISL_7352615, EPI_ISL_7352616, EPI_ISL_7352617, EPI_ISL_7352618, EPI_ISL_7352619, EPI_ISL_7352620, EPI_ISL_7352621, EPI_ISL_7352622, EPI_ISL_7352623, EPI_ISL_7352624, EPI_ISL_7352625, EPI_ISL_7352626, EPI_ISL_7352627, EPI_ISL_7352628, EPI_ISL_7352629, EPI_ISL_7352630, EPI_ISL_7352631, EPI_ISL_7352632, EPI_ISL_7352633, EPI_ISL_7352634, EPI_ISL_7352635, EPI_ISL_7352636, EPI_ISL_7352637, EPI_ISL_7352638, EPI_ISL_7352639, EPI_ISL_7352640, EPI_ISL_7352641, EPI_ISL_7352642, EPI_ISL_7352643, EPI_ISL_7352644, EPI_ISL_7352645, EPI_ISL_7352646, EPI_ISL_7352647, EPI_ISL_7352648, EPI_ISL_7352649, EPI_ISL_7352650, EPI_ISL_7352651, EPI_ISL_7352652, EPI_ISL_7352653, EPI_ISL_7352654, EPI_ISL_7352655, EPI_ISL_7352656, EPI_ISL_7352657, EPI_ISL_7352658, EPI_ISL_7352659, EPI_ISL_7352660, EPI_ISL_7352661, EPI_ISL_7352662, EPI_ISL_7352663, EPI_ISL_7352664, EPI_ISL_7352665, EPI_ISL_7352666, EPI_ISL_7352667, EPI_ISL_7352668, EPI_ISL_7352669, EPI_ISL_7352670, EPI_ISL_7352671, EPI_ISL_7352672, EPI_ISL_7352673, EPI_ISL_7352674, EPI_ISL_7352675, EPI_ISL_7352676, EPI_ISL_7352677, EPI_ISL_7352678, EPI_ISL_7352679, EPI_ISL_7352680, EPI_ISL_7352681, EPI_ISL_7352682, EPI_ISL_7352683, EPI_ISL_7352684, EPI_ISL_7352685, EPI_ISL_7352686, EPI_ISL_7352687, EPI_ISL_7352688, EPI_ISL_7352689, EPI_ISL_7352690, EPI_ISL_7352691, EPI_ISL_7352692, EPI_ISL_7352693, EPI_ISL_7352694, EPI_ISL_7352695, EPI_ISL_7352696, EPI_ISL_7352697, EPI_ISL_7352698, EPI_ISL_7352699, EPI_ISL_7352700, EPI_ISL_7352701, EPI_ISL_7352702, EPI_ISL_7352703, EPI_ISL_7352704, EPI_ISL_7352705, EPI_ISL_7352706, EPI_ISL_7352707, EPI_ISL_7352708, EPI_ISL_7352709, EPI_ISL_7352710, EPI_ISL_7352711, EPI_ISL_7352712, EPI_ISL_7352713, EPI_ISL_7352714, EPI_ISL_7352715, EPI_ISL_7352716, EPI_ISL_7352717, EPI_ISL_7352718, EPI_ISL_7352719, EPI_ISL_7352720, EPI_ISL_7352721, EPI_ISL_7352722, EPI_ISL_7352723, EPI_ISL_7352724, EPI_ISL_7352725, EPI_ISL_7352726, EPI_ISL_7352727, EPI_ISL_7352728, EPI_ISL_7352729, EPI_ISL_7352730, EPI_ISL_7352731, EPI_ISL_7352732, EPI_ISL_7352733, EPI_ISL_7352734, EPI_ISL_7352735, EPI_ISL_7352736, EPI_ISL_7352737, EPI_ISL_73527 |                                                                                                              |                                                                                                                      |                                                                                                                                                                                                                                                                                                                                                                                                                                                                                                                                                                                                                                                                                                                                                                                                                                                                                                                                                                                                                                                                 |



|                                                                                                                                                                                                                                                                                                                                                                                                                                                                                                                                                                                                                                                                                                                                                                                                                                                                                                                                                                                                                                                                                                                                                                                                                                                                                                                                                                                                                                                                                                                                                                                                                                                                                                                                                                                                                                                                                                                                                                                                                                                                                                                                                                                                                                                                                                                                                                                                                                                                                                                                                                                                                                                                                                                                                                                                                                                                                                                                                                                                                                                                                                                                                                                                                                                                                                                                                                                                                                                                                                                                                                                                                                                                                                                                                                                                                                                                                                                                                                                                                                                                                                                                                                                                                                                                                                                                                                                                                                                                                                                                                                                                                                                                                                                                                                                                                                                                                                                                                                                                                                                                                                                                                                                                                                                                                                                                                                                                                                                                                                                                                                                                                                                                                                                                                                                                                                                                                                                                                                                                                                                                                                                                                                                                                                                                                                                                                                                                                                                                                                                                                                                                                                                                                                                                                                                                                                                                                                                                                                                                                                                                                                                                                                                                                                                                                                                                                                                                                                                                                                                                                                                                                                                                                                                                                                                                                                                                                                                                                                                                                                                                                                                                                                                                                                                                                                                                                                                                                                                                                                                                                                                                                                                                                                                                                                                                                                                                                                                                                                                                                                                                                                                                                                                                                                                                                                                                                                                                                                                                                                                                                                                                                                                                                                                                                                                                                                                                                                                                                                                                                                                                                                                                                                                                                                                                                                                                                                                                                                                                                                                                                                                                                                                                                                                                                                                                                                                                                                                                                                                                                                                                                                               |                                                                                                            |                                                                                                 |                                                                                                                                                                                                                                                                                                                                                                                                                                                                                                                    |
|---------------------------------------------------------------------------------------------------------------------------------------------------------------------------------------------------------------------------------------------------------------------------------------------------------------------------------------------------------------------------------------------------------------------------------------------------------------------------------------------------------------------------------------------------------------------------------------------------------------------------------------------------------------------------------------------------------------------------------------------------------------------------------------------------------------------------------------------------------------------------------------------------------------------------------------------------------------------------------------------------------------------------------------------------------------------------------------------------------------------------------------------------------------------------------------------------------------------------------------------------------------------------------------------------------------------------------------------------------------------------------------------------------------------------------------------------------------------------------------------------------------------------------------------------------------------------------------------------------------------------------------------------------------------------------------------------------------------------------------------------------------------------------------------------------------------------------------------------------------------------------------------------------------------------------------------------------------------------------------------------------------------------------------------------------------------------------------------------------------------------------------------------------------------------------------------------------------------------------------------------------------------------------------------------------------------------------------------------------------------------------------------------------------------------------------------------------------------------------------------------------------------------------------------------------------------------------------------------------------------------------------------------------------------------------------------------------------------------------------------------------------------------------------------------------------------------------------------------------------------------------------------------------------------------------------------------------------------------------------------------------------------------------------------------------------------------------------------------------------------------------------------------------------------------------------------------------------------------------------------------------------------------------------------------------------------------------------------------------------------------------------------------------------------------------------------------------------------------------------------------------------------------------------------------------------------------------------------------------------------------------------------------------------------------------------------------------------------------------------------------------------------------------------------------------------------------------------------------------------------------------------------------------------------------------------------------------------------------------------------------------------------------------------------------------------------------------------------------------------------------------------------------------------------------------------------------------------------------------------------------------------------------------------------------------------------------------------------------------------------------------------------------------------------------------------------------------------------------------------------------------------------------------------------------------------------------------------------------------------------------------------------------------------------------------------------------------------------------------------------------------------------------------------------------------------------------------------------------------------------------------------------------------------------------------------------------------------------------------------------------------------------------------------------------------------------------------------------------------------------------------------------------------------------------------------------------------------------------------------------------------------------------------------------------------------------------------------------------------------------------------------------------------------------------------------------------------------------------------------------------------------------------------------------------------------------------------------------------------------------------------------------------------------------------------------------------------------------------------------------------------------------------------------------------------------------------------------------------------------------------------------------------------------------------------------------------------------------------------------------------------------------------------------------------------------------------------------------------------------------------------------------------------------------------------------------------------------------------------------------------------------------------------------------------------------------------------------------------------------------------------------------------------------------------------------------------------------------------------------------------------------------------------------------------------------------------------------------------------------------------------------------------------------------------------------------------------------------------------------------------------------------------------------------------------------------------------------------------------------------------------------------------------------------------------------------------------------------------------------------------------------------------------------------------------------------------------------------------------------------------------------------------------------------------------------------------------------------------------------------------------------------------------------------------------------------------------------------------------------------------------------------------------------------------------------------------------------------------------------------------------------------------------------------------------------------------------------------------------------------------------------------------------------------------------------------------------------------------------------------------------------------------------------------------------------------------------------------------------------------------------------------------------------------------------------------------------------------------------------------------------------------------------------------------------------------------------------------------------------------------------------------------------------------------------------------------------------------------------------------------------------------------------------------------------------------------------------------------------------------------------------------------------------------------------------------------------------------------------------------------------------------------------------------------------------------------------------------------------------------------------------------------------------------------------------------------------------------------------------------------------------------------------------------------------------------------------------------------------------------------------------------------------------------------------------------------------------------------------------------------------------------------------------------------------------------------------------------------------------------------------------------------------------------------------------------------------------------------------------------------------------------------------------------------------------------------------------------------------------------------------------------------------------------------------------------------------------------------------------------------------------------------------------------------------------------------------------------------------------------------------------------------------------------------------------------------------------------------------------------------------------------------------------------------------------------------------------------------------------------------------------------------------------------------------------------------------------------------------------------------------------------------------------------------------------------------------------------------------------------------------------------------------------------------------------------------------------------------------------------------------------------------------------------------------------------------------------------------------------------------------------------------------------------------------------------------------------------------------------------------------------------------------------------------------------------------------------------------------------------------------------------------------------------------------------------------------------------------------------------------------------------------------------------------------------------------------------------------------------------------------------------------------------------------------------------------------------------------------------------------------------------------------------------------------------------------------------------------------------|------------------------------------------------------------------------------------------------------------|-------------------------------------------------------------------------------------------------|--------------------------------------------------------------------------------------------------------------------------------------------------------------------------------------------------------------------------------------------------------------------------------------------------------------------------------------------------------------------------------------------------------------------------------------------------------------------------------------------------------------------|
| EPI_ISL_7154400,<br>EPI_ISL_7154401,<br>EPI_ISL_7154402,<br>EPI_ISL_7500444                                                                                                                                                                                                                                                                                                                                                                                                                                                                                                                                                                                                                                                                                                                                                                                                                                                                                                                                                                                                                                                                                                                                                                                                                                                                                                                                                                                                                                                                                                                                                                                                                                                                                                                                                                                                                                                                                                                                                                                                                                                                                                                                                                                                                                                                                                                                                                                                                                                                                                                                                                                                                                                                                                                                                                                                                                                                                                                                                                                                                                                                                                                                                                                                                                                                                                                                                                                                                                                                                                                                                                                                                                                                                                                                                                                                                                                                                                                                                                                                                                                                                                                                                                                                                                                                                                                                                                                                                                                                                                                                                                                                                                                                                                                                                                                                                                                                                                                                                                                                                                                                                                                                                                                                                                                                                                                                                                                                                                                                                                                                                                                                                                                                                                                                                                                                                                                                                                                                                                                                                                                                                                                                                                                                                                                                                                                                                                                                                                                                                                                                                                                                                                                                                                                                                                                                                                                                                                                                                                                                                                                                                                                                                                                                                                                                                                                                                                                                                                                                                                                                                                                                                                                                                                                                                                                                                                                                                                                                                                                                                                                                                                                                                                                                                                                                                                                                                                                                                                                                                                                                                                                                                                                                                                                                                                                                                                                                                                                                                                                                                                                                                                                                                                                                                                                                                                                                                                                                                                                                                                                                                                                                                                                                                                                                                                                                                                                                                                                                                                                                                                                                                                                                                                                                                                                                                                                                                                                                                                                                                                                                                                                                                                                                                                                                                                                                                                                                                                                                                                                                                                   | Mako Medical                                                                                               | Centers for Disease Control and Prevention Division of Viral Diseases, Pathogen Discovery       | Benjamin Rambo-Martin; Christopher Gulvick; Clinton Paden; Dakota Howard; Dhwani Batra; Duncan MacCannell; Erisa Jula; Sara Caravas; Kristine Lacey; Lauren Moon; Matthew Schmerer; Matthew Tugwell; Peter Cook; Scott Sammons; Shatavia Morrison; Tymecia Kendall; Victoria Caban Figueroa; Yvette Unoarumhi                                                                                                                                                                                                      |
| EPI_ISL_7464406,<br>EPI_ISL_7464407,<br>EPI_ISL_7464408                                                                                                                                                                                                                                                                                                                                                                                                                                                                                                                                                                                                                                                                                                                                                                                                                                                                                                                                                                                                                                                                                                                                                                                                                                                                                                                                                                                                                                                                                                                                                                                                                                                                                                                                                                                                                                                                                                                                                                                                                                                                                                                                                                                                                                                                                                                                                                                                                                                                                                                                                                                                                                                                                                                                                                                                                                                                                                                                                                                                                                                                                                                                                                                                                                                                                                                                                                                                                                                                                                                                                                                                                                                                                                                                                                                                                                                                                                                                                                                                                                                                                                                                                                                                                                                                                                                                                                                                                                                                                                                                                                                                                                                                                                                                                                                                                                                                                                                                                                                                                                                                                                                                                                                                                                                                                                                                                                                                                                                                                                                                                                                                                                                                                                                                                                                                                                                                                                                                                                                                                                                                                                                                                                                                                                                                                                                                                                                                                                                                                                                                                                                                                                                                                                                                                                                                                                                                                                                                                                                                                                                                                                                                                                                                                                                                                                                                                                                                                                                                                                                                                                                                                                                                                                                                                                                                                                                                                                                                                                                                                                                                                                                                                                                                                                                                                                                                                                                                                                                                                                                                                                                                                                                                                                                                                                                                                                                                                                                                                                                                                                                                                                                                                                                                                                                                                                                                                                                                                                                                                                                                                                                                                                                                                                                                                                                                                                                                                                                                                                                                                                                                                                                                                                                                                                                                                                                                                                                                                                                                                                                                                                                                                                                                                                                                                                                                                                                                                                                                                                                                                                                       | Malawi Liverpool Wellcome Trust Clinical Research Program                                                  | Malawi Liverpool Wellcome Trust Clinical Research Program                                       | Belson Kutambe; Ben Morton; Catherine Ansccombe; Kondwani Jambo; Mavis Menyere; Philip Ashton; Sam Lissauer                                                                                                                                                                                                                                                                                                                                                                                                        |
| EPI_ISL_7404794                                                                                                                                                                                                                                                                                                                                                                                                                                                                                                                                                                                                                                                                                                                                                                                                                                                                                                                                                                                                                                                                                                                                                                                                                                                                                                                                                                                                                                                                                                                                                                                                                                                                                                                                                                                                                                                                                                                                                                                                                                                                                                                                                                                                                                                                                                                                                                                                                                                                                                                                                                                                                                                                                                                                                                                                                                                                                                                                                                                                                                                                                                                                                                                                                                                                                                                                                                                                                                                                                                                                                                                                                                                                                                                                                                                                                                                                                                                                                                                                                                                                                                                                                                                                                                                                                                                                                                                                                                                                                                                                                                                                                                                                                                                                                                                                                                                                                                                                                                                                                                                                                                                                                                                                                                                                                                                                                                                                                                                                                                                                                                                                                                                                                                                                                                                                                                                                                                                                                                                                                                                                                                                                                                                                                                                                                                                                                                                                                                                                                                                                                                                                                                                                                                                                                                                                                                                                                                                                                                                                                                                                                                                                                                                                                                                                                                                                                                                                                                                                                                                                                                                                                                                                                                                                                                                                                                                                                                                                                                                                                                                                                                                                                                                                                                                                                                                                                                                                                                                                                                                                                                                                                                                                                                                                                                                                                                                                                                                                                                                                                                                                                                                                                                                                                                                                                                                                                                                                                                                                                                                                                                                                                                                                                                                                                                                                                                                                                                                                                                                                                                                                                                                                                                                                                                                                                                                                                                                                                                                                                                                                                                                                                                                                                                                                                                                                                                                                                                                                                                                                                                                                                               | Maryland Genomics, Institute for Genome Sciences, University of Maryland School of Medicine                | Maryland Genomics, Institute for Genome Sciences, University of Maryland School of Medicine     | Clairé M; Fraser; George; Hazen; Holly; Humphrys; Jacques; Jain; Kevin; Kranthi; Lisa D; Luke J; Mike; Ott; Ravel; Regan; Roussey; Sadzewicz; Sandra; Tallon; Tracy; Vavikolanu                                                                                                                                                                                                                                                                                                                                    |
| EPI_ISL_7469697                                                                                                                                                                                                                                                                                                                                                                                                                                                                                                                                                                                                                                                                                                                                                                                                                                                                                                                                                                                                                                                                                                                                                                                                                                                                                                                                                                                                                                                                                                                                                                                                                                                                                                                                                                                                                                                                                                                                                                                                                                                                                                                                                                                                                                                                                                                                                                                                                                                                                                                                                                                                                                                                                                                                                                                                                                                                                                                                                                                                                                                                                                                                                                                                                                                                                                                                                                                                                                                                                                                                                                                                                                                                                                                                                                                                                                                                                                                                                                                                                                                                                                                                                                                                                                                                                                                                                                                                                                                                                                                                                                                                                                                                                                                                                                                                                                                                                                                                                                                                                                                                                                                                                                                                                                                                                                                                                                                                                                                                                                                                                                                                                                                                                                                                                                                                                                                                                                                                                                                                                                                                                                                                                                                                                                                                                                                                                                                                                                                                                                                                                                                                                                                                                                                                                                                                                                                                                                                                                                                                                                                                                                                                                                                                                                                                                                                                                                                                                                                                                                                                                                                                                                                                                                                                                                                                                                                                                                                                                                                                                                                                                                                                                                                                                                                                                                                                                                                                                                                                                                                                                                                                                                                                                                                                                                                                                                                                                                                                                                                                                                                                                                                                                                                                                                                                                                                                                                                                                                                                                                                                                                                                                                                                                                                                                                                                                                                                                                                                                                                                                                                                                                                                                                                                                                                                                                                                                                                                                                                                                                                                                                                                                                                                                                                                                                                                                                                                                                                                                                                                                                                                                               | Mass General Brigham                                                                                       | Mass General Brigham                                                                            | A.E.; Adams, G.; Anahtar, M.; B.L.; B.W.; Bauer, M.; Birren; Branda, J.; Carter, A.; Cerrato, F.; Chaluvali, S.; Chapman, Cusick, C.; D.J.; DeRuff, K.; E. and Sabeti; Flowers, K.; Gallagher, G.; Gladden-Young, A.; Gnirke, A.; Harris, J.; J.E.; K.J.; LaRocque, R.; Lagerborg, K.; Lemieux; Lin; Loreth, C.; MacInnis; Neumann, A.; Normandin, E.; P.C.; Park; Pierce, V.; Reilly, S.; Rosenberg; Rudy, M.; Ryan, E.; S.B.; Shaw, B.; Siddle; Slater, D.; Smole, S.; Tomkins-Tinch, C.; Turbett, S.; Uddin, R. |
| EPI_ISL_6886593, EPI_ISL_6886594, EPI_ISL_6886595, EPI_ISL_6886596, EPI_ISL_7590775, EPI_ISL_7590919, EPI_ISL_7590929, EPI_ISL_7590955, EPI_ISL_7590991, EPI_ISL_7591005, EPI_ISL_7591006, EPI_ISL_7591007, EPI_ISL_7591008, EPI_ISL_7591009, EPI_ISL_7591010, EPI_ISL_7591011, EPI_ISL_7591012, EPI_ISL_7591013, EPI_ISL_7591014, EPI_ISL_7591015, EPI_ISL_7591016, EPI_ISL_7591018, EPI_ISL_7591019                                                                                                                                                                                                                                                                                                                                                                                                                                                                                                                                                                                                                                                                                                                                                                                                                                                                                                                                                                                                                                                                                                                                                                                                                                                                                                                                                                                                                                                                                                                                                                                                                                                                                                                                                                                                                                                                                                                                                                                                                                                                                                                                                                                                                                                                                                                                                                                                                                                                                                                                                                                                                                                                                                                                                                                                                                                                                                                                                                                                                                                                                                                                                                                                                                                                                                                                                                                                                                                                                                                                                                                                                                                                                                                                                                                                                                                                                                                                                                                                                                                                                                                                                                                                                                                                                                                                                                                                                                                                                                                                                                                                                                                                                                                                                                                                                                                                                                                                                                                                                                                                                                                                                                                                                                                                                                                                                                                                                                                                                                                                                                                                                                                                                                                                                                                                                                                                                                                                                                                                                                                                                                                                                                                                                                                                                                                                                                                                                                                                                                                                                                                                                                                                                                                                                                                                                                                                                                                                                                                                                                                                                                                                                                                                                                                                                                                                                                                                                                                                                                                                                                                                                                                                                                                                                                                                                                                                                                                                                                                                                                                                                                                                                                                                                                                                                                                                                                                                                                                                                                                                                                                                                                                                                                                                                                                                                                                                                                                                                                                                                                                                                                                                                                                                                                                                                                                                                                                                                                                                                                                                                                                                                                                                                                                                                                                                                                                                                                                                                                                                                                                                                                                                                                                                                                                                                                                                                                                                                                                                                                                                                                                                                                                                                                         | see above                                                                                                  | Max von Pettenkofer Institute, Virology, National Reference Center for Retroviruses, LMU Munich | Laboratory for Functional Genome Analysis; Dept. Genomics; Gene Center of the LMU Munich                                                                                                                                                                                                                                                                                                                                                                                                                           |
| EPI_ISL_7267259,<br>EPI_ISL_7470216,<br>EPI_ISL_7470264,<br>EPI_ISL_7470331                                                                                                                                                                                                                                                                                                                                                                                                                                                                                                                                                                                                                                                                                                                                                                                                                                                                                                                                                                                                                                                                                                                                                                                                                                                                                                                                                                                                                                                                                                                                                                                                                                                                                                                                                                                                                                                                                                                                                                                                                                                                                                                                                                                                                                                                                                                                                                                                                                                                                                                                                                                                                                                                                                                                                                                                                                                                                                                                                                                                                                                                                                                                                                                                                                                                                                                                                                                                                                                                                                                                                                                                                                                                                                                                                                                                                                                                                                                                                                                                                                                                                                                                                                                                                                                                                                                                                                                                                                                                                                                                                                                                                                                                                                                                                                                                                                                                                                                                                                                                                                                                                                                                                                                                                                                                                                                                                                                                                                                                                                                                                                                                                                                                                                                                                                                                                                                                                                                                                                                                                                                                                                                                                                                                                                                                                                                                                                                                                                                                                                                                                                                                                                                                                                                                                                                                                                                                                                                                                                                                                                                                                                                                                                                                                                                                                                                                                                                                                                                                                                                                                                                                                                                                                                                                                                                                                                                                                                                                                                                                                                                                                                                                                                                                                                                                                                                                                                                                                                                                                                                                                                                                                                                                                                                                                                                                                                                                                                                                                                                                                                                                                                                                                                                                                                                                                                                                                                                                                                                                                                                                                                                                                                                                                                                                                                                                                                                                                                                                                                                                                                                                                                                                                                                                                                                                                                                                                                                                                                                                                                                                                                                                                                                                                                                                                                                                                                                                                                                                                                                                                                   | Medical Microbiology Unit, Department for Laboratory Medicine, Drammen Hospital, Vestre Viken Health Trust | Norwegian Institute of Public Health, Department of Virology                                    | Atiya R Ali; Debec Nadia; Engebretsen Serina Beate; Garcia Lorente Ignacio; Hilde Elshaug; Hilde Vollen; Jon Bråte; Kamilla Heddeland Instefjord; Karoline Bragstad; Kathrine Stene-Johansen; Line Victoria Moen; Marie Paulsen Madsen; Olav Hungnes; Pedersen Benedikte Nevjen; Rasmus Riis Kopperud                                                                                                                                                                                                              |
| EPI_ISL_7443804,<br>EPI_ISL_7443805,<br>EPI_ISL_7443809,<br>EPI_ISL_7443815                                                                                                                                                                                                                                                                                                                                                                                                                                                                                                                                                                                                                                                                                                                                                                                                                                                                                                                                                                                                                                                                                                                                                                                                                                                                                                                                                                                                                                                                                                                                                                                                                                                                                                                                                                                                                                                                                                                                                                                                                                                                                                                                                                                                                                                                                                                                                                                                                                                                                                                                                                                                                                                                                                                                                                                                                                                                                                                                                                                                                                                                                                                                                                                                                                                                                                                                                                                                                                                                                                                                                                                                                                                                                                                                                                                                                                                                                                                                                                                                                                                                                                                                                                                                                                                                                                                                                                                                                                                                                                                                                                                                                                                                                                                                                                                                                                                                                                                                                                                                                                                                                                                                                                                                                                                                                                                                                                                                                                                                                                                                                                                                                                                                                                                                                                                                                                                                                                                                                                                                                                                                                                                                                                                                                                                                                                                                                                                                                                                                                                                                                                                                                                                                                                                                                                                                                                                                                                                                                                                                                                                                                                                                                                                                                                                                                                                                                                                                                                                                                                                                                                                                                                                                                                                                                                                                                                                                                                                                                                                                                                                                                                                                                                                                                                                                                                                                                                                                                                                                                                                                                                                                                                                                                                                                                                                                                                                                                                                                                                                                                                                                                                                                                                                                                                                                                                                                                                                                                                                                                                                                                                                                                                                                                                                                                                                                                                                                                                                                                                                                                                                                                                                                                                                                                                                                                                                                                                                                                                                                                                                                                                                                                                                                                                                                                                                                                                                                                                                                                                                                                                   | Medizinische Laboratorien Düsseldorf                                                                       | Robert Koch Institute                                                                           |                                                                                                                                                                                                                                                                                                                                                                                                                                                                                                                    |
| EPI_ISL_7416680                                                                                                                                                                                                                                                                                                                                                                                                                                                                                                                                                                                                                                                                                                                                                                                                                                                                                                                                                                                                                                                                                                                                                                                                                                                                                                                                                                                                                                                                                                                                                                                                                                                                                                                                                                                                                                                                                                                                                                                                                                                                                                                                                                                                                                                                                                                                                                                                                                                                                                                                                                                                                                                                                                                                                                                                                                                                                                                                                                                                                                                                                                                                                                                                                                                                                                                                                                                                                                                                                                                                                                                                                                                                                                                                                                                                                                                                                                                                                                                                                                                                                                                                                                                                                                                                                                                                                                                                                                                                                                                                                                                                                                                                                                                                                                                                                                                                                                                                                                                                                                                                                                                                                                                                                                                                                                                                                                                                                                                                                                                                                                                                                                                                                                                                                                                                                                                                                                                                                                                                                                                                                                                                                                                                                                                                                                                                                                                                                                                                                                                                                                                                                                                                                                                                                                                                                                                                                                                                                                                                                                                                                                                                                                                                                                                                                                                                                                                                                                                                                                                                                                                                                                                                                                                                                                                                                                                                                                                                                                                                                                                                                                                                                                                                                                                                                                                                                                                                                                                                                                                                                                                                                                                                                                                                                                                                                                                                                                                                                                                                                                                                                                                                                                                                                                                                                                                                                                                                                                                                                                                                                                                                                                                                                                                                                                                                                                                                                                                                                                                                                                                                                                                                                                                                                                                                                                                                                                                                                                                                                                                                                                                                                                                                                                                                                                                                                                                                                                                                                                                                                                                                                               | Medizinisches Versorgungszentrum für Labormedizin und Mikrobiologie Ruhr GmbH - mvzlm RUHR GmbH            | Robert Koch Institute                                                                           |                                                                                                                                                                                                                                                                                                                                                                                                                                                                                                                    |
| EPI_ISL_6854346,<br>EPI_ISL_6854347,<br>EPI_ISL_6854348                                                                                                                                                                                                                                                                                                                                                                                                                                                                                                                                                                                                                                                                                                                                                                                                                                                                                                                                                                                                                                                                                                                                                                                                                                                                                                                                                                                                                                                                                                                                                                                                                                                                                                                                                                                                                                                                                                                                                                                                                                                                                                                                                                                                                                                                                                                                                                                                                                                                                                                                                                                                                                                                                                                                                                                                                                                                                                                                                                                                                                                                                                                                                                                                                                                                                                                                                                                                                                                                                                                                                                                                                                                                                                                                                                                                                                                                                                                                                                                                                                                                                                                                                                                                                                                                                                                                                                                                                                                                                                                                                                                                                                                                                                                                                                                                                                                                                                                                                                                                                                                                                                                                                                                                                                                                                                                                                                                                                                                                                                                                                                                                                                                                                                                                                                                                                                                                                                                                                                                                                                                                                                                                                                                                                                                                                                                                                                                                                                                                                                                                                                                                                                                                                                                                                                                                                                                                                                                                                                                                                                                                                                                                                                                                                                                                                                                                                                                                                                                                                                                                                                                                                                                                                                                                                                                                                                                                                                                                                                                                                                                                                                                                                                                                                                                                                                                                                                                                                                                                                                                                                                                                                                                                                                                                                                                                                                                                                                                                                                                                                                                                                                                                                                                                                                                                                                                                                                                                                                                                                                                                                                                                                                                                                                                                                                                                                                                                                                                                                                                                                                                                                                                                                                                                                                                                                                                                                                                                                                                                                                                                                                                                                                                                                                                                                                                                                                                                                                                                                                                                                                                       | Microbiologia e Virologia Cotugno                                                                          | Microbiologia e Virologia Cotugno                                                               | Antonio Canonicò; Antonio Fascione; Claudia Tiberio; Enza Mallardo; Francesco Nappo; Giovanni D'Auria; Giuseppe di Genaro; Ilaria Cavallaro; Luigi Atripaldi                                                                                                                                                                                                                                                                                                                                                       |
| EPI_ISL_7462324                                                                                                                                                                                                                                                                                                                                                                                                                                                                                                                                                                                                                                                                                                                                                                                                                                                                                                                                                                                                                                                                                                                                                                                                                                                                                                                                                                                                                                                                                                                                                                                                                                                                                                                                                                                                                                                                                                                                                                                                                                                                                                                                                                                                                                                                                                                                                                                                                                                                                                                                                                                                                                                                                                                                                                                                                                                                                                                                                                                                                                                                                                                                                                                                                                                                                                                                                                                                                                                                                                                                                                                                                                                                                                                                                                                                                                                                                                                                                                                                                                                                                                                                                                                                                                                                                                                                                                                                                                                                                                                                                                                                                                                                                                                                                                                                                                                                                                                                                                                                                                                                                                                                                                                                                                                                                                                                                                                                                                                                                                                                                                                                                                                                                                                                                                                                                                                                                                                                                                                                                                                                                                                                                                                                                                                                                                                                                                                                                                                                                                                                                                                                                                                                                                                                                                                                                                                                                                                                                                                                                                                                                                                                                                                                                                                                                                                                                                                                                                                                                                                                                                                                                                                                                                                                                                                                                                                                                                                                                                                                                                                                                                                                                                                                                                                                                                                                                                                                                                                                                                                                                                                                                                                                                                                                                                                                                                                                                                                                                                                                                                                                                                                                                                                                                                                                                                                                                                                                                                                                                                                                                                                                                                                                                                                                                                                                                                                                                                                                                                                                                                                                                                                                                                                                                                                                                                                                                                                                                                                                                                                                                                                                                                                                                                                                                                                                                                                                                                                                                                                                                                                                                               | Microbiology Department, University Hospital Araba                                                         | Microbiology Department, University Hospital Donostia                                           | Cilla G.; Gomez M; Hernaez S; Marimon JM; Martin-Peñaranda T; Montes M; Piñeiro I; Sorrairain A                                                                                                                                                                                                                                                                                                                                                                                                                    |
| EPI_ISL_7502103,<br>EPI_ISL_7502107                                                                                                                                                                                                                                                                                                                                                                                                                                                                                                                                                                                                                                                                                                                                                                                                                                                                                                                                                                                                                                                                                                                                                                                                                                                                                                                                                                                                                                                                                                                                                                                                                                                                                                                                                                                                                                                                                                                                                                                                                                                                                                                                                                                                                                                                                                                                                                                                                                                                                                                                                                                                                                                                                                                                                                                                                                                                                                                                                                                                                                                                                                                                                                                                                                                                                                                                                                                                                                                                                                                                                                                                                                                                                                                                                                                                                                                                                                                                                                                                                                                                                                                                                                                                                                                                                                                                                                                                                                                                                                                                                                                                                                                                                                                                                                                                                                                                                                                                                                                                                                                                                                                                                                                                                                                                                                                                                                                                                                                                                                                                                                                                                                                                                                                                                                                                                                                                                                                                                                                                                                                                                                                                                                                                                                                                                                                                                                                                                                                                                                                                                                                                                                                                                                                                                                                                                                                                                                                                                                                                                                                                                                                                                                                                                                                                                                                                                                                                                                                                                                                                                                                                                                                                                                                                                                                                                                                                                                                                                                                                                                                                                                                                                                                                                                                                                                                                                                                                                                                                                                                                                                                                                                                                                                                                                                                                                                                                                                                                                                                                                                                                                                                                                                                                                                                                                                                                                                                                                                                                                                                                                                                                                                                                                                                                                                                                                                                                                                                                                                                                                                                                                                                                                                                                                                                                                                                                                                                                                                                                                                                                                                                                                                                                                                                                                                                                                                                                                                                                                                                                                                                                           | Microbiology Department. Complejo Hospitalario Universitario de Vigo                                       | Microbiology Department. Complejo Hospitalario Universitario de Vigo                            | Alvarez M; Cabrera JJ; Carballo R; Cortizo S; Davina C; Martinez L; Mediero G; Pena I; Perez S; Potel C; Requeiro B; Rey S; Vassallo FJ; del-Campo V                                                                                                                                                                                                                                                                                                                                                               |
| EPI_ISL_7566142                                                                                                                                                                                                                                                                                                                                                                                                                                                                                                                                                                                                                                                                                                                                                                                                                                                                                                                                                                                                                                                                                                                                                                                                                                                                                                                                                                                                                                                                                                                                                                                                                                                                                                                                                                                                                                                                                                                                                                                                                                                                                                                                                                                                                                                                                                                                                                                                                                                                                                                                                                                                                                                                                                                                                                                                                                                                                                                                                                                                                                                                                                                                                                                                                                                                                                                                                                                                                                                                                                                                                                                                                                                                                                                                                                                                                                                                                                                                                                                                                                                                                                                                                                                                                                                                                                                                                                                                                                                                                                                                                                                                                                                                                                                                                                                                                                                                                                                                                                                                                                                                                                                                                                                                                                                                                                                                                                                                                                                                                                                                                                                                                                                                                                                                                                                                                                                                                                                                                                                                                                                                                                                                                                                                                                                                                                                                                                                                                                                                                                                                                                                                                                                                                                                                                                                                                                                                                                                                                                                                                                                                                                                                                                                                                                                                                                                                                                                                                                                                                                                                                                                                                                                                                                                                                                                                                                                                                                                                                                                                                                                                                                                                                                                                                                                                                                                                                                                                                                                                                                                                                                                                                                                                                                                                                                                                                                                                                                                                                                                                                                                                                                                                                                                                                                                                                                                                                                                                                                                                                                                                                                                                                                                                                                                                                                                                                                                                                                                                                                                                                                                                                                                                                                                                                                                                                                                                                                                                                                                                                                                                                                                                                                                                                                                                                                                                                                                                                                                                                                                                                                                                                               | Ministry of Health Turkey                                                                                  | Ministry of Health Turkey                                                                       | Fatma Bayraktar; Gulay Korukluoglu; Suleyman Yalcin; Yasemin Cosgun                                                                                                                                                                                                                                                                                                                                                                                                                                                |
| EPI_ISL_7496678                                                                                                                                                                                                                                                                                                                                                                                                                                                                                                                                                                                                                                                                                                                                                                                                                                                                                                                                                                                                                                                                                                                                                                                                                                                                                                                                                                                                                                                                                                                                                                                                                                                                                                                                                                                                                                                                                                                                                                                                                                                                                                                                                                                                                                                                                                                                                                                                                                                                                                                                                                                                                                                                                                                                                                                                                                                                                                                                                                                                                                                                                                                                                                                                                                                                                                                                                                                                                                                                                                                                                                                                                                                                                                                                                                                                                                                                                                                                                                                                                                                                                                                                                                                                                                                                                                                                                                                                                                                                                                                                                                                                                                                                                                                                                                                                                                                                                                                                                                                                                                                                                                                                                                                                                                                                                                                                                                                                                                                                                                                                                                                                                                                                                                                                                                                                                                                                                                                                                                                                                                                                                                                                                                                                                                                                                                                                                                                                                                                                                                                                                                                                                                                                                                                                                                                                                                                                                                                                                                                                                                                                                                                                                                                                                                                                                                                                                                                                                                                                                                                                                                                                                                                                                                                                                                                                                                                                                                                                                                                                                                                                                                                                                                                                                                                                                                                                                                                                                                                                                                                                                                                                                                                                                                                                                                                                                                                                                                                                                                                                                                                                                                                                                                                                                                                                                                                                                                                                                                                                                                                                                                                                                                                                                                                                                                                                                                                                                                                                                                                                                                                                                                                                                                                                                                                                                                                                                                                                                                                                                                                                                                                                                                                                                                                                                                                                                                                                                                                                                                                                                                                                                               | Minnesota Department of Health, Public Health Laboratory                                                   | Minnesota Department of Health, Public Health Laboratory                                        | Alyssa Mondelli; Elizabeth Horn; Jacob Garfin; Kelly Pung; Matt Plumb; Sarah Namugenyi; and Xiong Wang                                                                                                                                                                                                                                                                                                                                                                                                             |
| EPI_ISL_6963002                                                                                                                                                                                                                                                                                                                                                                                                                                                                                                                                                                                                                                                                                                                                                                                                                                                                                                                                                                                                                                                                                                                                                                                                                                                                                                                                                                                                                                                                                                                                                                                                                                                                                                                                                                                                                                                                                                                                                                                                                                                                                                                                                                                                                                                                                                                                                                                                                                                                                                                                                                                                                                                                                                                                                                                                                                                                                                                                                                                                                                                                                                                                                                                                                                                                                                                                                                                                                                                                                                                                                                                                                                                                                                                                                                                                                                                                                                                                                                                                                                                                                                                                                                                                                                                                                                                                                                                                                                                                                                                                                                                                                                                                                                                                                                                                                                                                                                                                                                                                                                                                                                                                                                                                                                                                                                                                                                                                                                                                                                                                                                                                                                                                                                                                                                                                                                                                                                                                                                                                                                                                                                                                                                                                                                                                                                                                                                                                                                                                                                                                                                                                                                                                                                                                                                                                                                                                                                                                                                                                                                                                                                                                                                                                                                                                                                                                                                                                                                                                                                                                                                                                                                                                                                                                                                                                                                                                                                                                                                                                                                                                                                                                                                                                                                                                                                                                                                                                                                                                                                                                                                                                                                                                                                                                                                                                                                                                                                                                                                                                                                                                                                                                                                                                                                                                                                                                                                                                                                                                                                                                                                                                                                                                                                                                                                                                                                                                                                                                                                                                                                                                                                                                                                                                                                                                                                                                                                                                                                                                                                                                                                                                                                                                                                                                                                                                                                                                                                                                                                                                                                                                                               | Mirialis                                                                                                   | CNR Virus des Infections Respiratoires - France SUD                                             | Antoine Oblette; Antonin Bai; Bruno Lina; Bruno Simon; Camille Delcloire; Eva Oddoux; Florence Morfin; Gregory Destras; Gwendolyne Burfin; Hadrien Regue; Hervé Crehalet; Jean François Bore; Jeremy Cordier; Laurence Josset; Martine Valette; Noémie Fessy; Quentin Semanas; Richard Chalvignac; Thibault Corsin; Thibault Gouiran                                                                                                                                                                               |
| EPI_ISL_7661074                                                                                                                                                                                                                                                                                                                                                                                                                                                                                                                                                                                                                                                                                                                                                                                                                                                                                                                                                                                                                                                                                                                                                                                                                                                                                                                                                                                                                                                                                                                                                                                                                                                                                                                                                                                                                                                                                                                                                                                                                                                                                                                                                                                                                                                                                                                                                                                                                                                                                                                                                                                                                                                                                                                                                                                                                                                                                                                                                                                                                                                                                                                                                                                                                                                                                                                                                                                                                                                                                                                                                                                                                                                                                                                                                                                                                                                                                                                                                                                                                                                                                                                                                                                                                                                                                                                                                                                                                                                                                                                                                                                                                                                                                                                                                                                                                                                                                                                                                                                                                                                                                                                                                                                                                                                                                                                                                                                                                                                                                                                                                                                                                                                                                                                                                                                                                                                                                                                                                                                                                                                                                                                                                                                                                                                                                                                                                                                                                                                                                                                                                                                                                                                                                                                                                                                                                                                                                                                                                                                                                                                                                                                                                                                                                                                                                                                                                                                                                                                                                                                                                                                                                                                                                                                                                                                                                                                                                                                                                                                                                                                                                                                                                                                                                                                                                                                                                                                                                                                                                                                                                                                                                                                                                                                                                                                                                                                                                                                                                                                                                                                                                                                                                                                                                                                                                                                                                                                                                                                                                                                                                                                                                                                                                                                                                                                                                                                                                                                                                                                                                                                                                                                                                                                                                                                                                                                                                                                                                                                                                                                                                                                                                                                                                                                                                                                                                                                                                                                                                                                                                                                                                               | Mirimus                                                                                                    | Biotia                                                                                          | Christopher Mason; David Danko; Dorotya Nagy-Szakal; Mara Couto-Rodriguez; Marilyne Debieu; Niamh O'Hara; Xavier Jirau Serrano                                                                                                                                                                                                                                                                                                                                                                                     |
| EPI_ISL_7193991,<br>EPI_ISL_7286479,<br>EPI_ISL_7516233,<br>EPI_ISL_7519931,<br>EPI_ISL_7527590,<br>EPI_ISL_7527959                                                                                                                                                                                                                                                                                                                                                                                                                                                                                                                                                                                                                                                                                                                                                                                                                                                                                                                                                                                                                                                                                                                                                                                                                                                                                                                                                                                                                                                                                                                                                                                                                                                                                                                                                                                                                                                                                                                                                                                                                                                                                                                                                                                                                                                                                                                                                                                                                                                                                                                                                                                                                                                                                                                                                                                                                                                                                                                                                                                                                                                                                                                                                                                                                                                                                                                                                                                                                                                                                                                                                                                                                                                                                                                                                                                                                                                                                                                                                                                                                                                                                                                                                                                                                                                                                                                                                                                                                                                                                                                                                                                                                                                                                                                                                                                                                                                                                                                                                                                                                                                                                                                                                                                                                                                                                                                                                                                                                                                                                                                                                                                                                                                                                                                                                                                                                                                                                                                                                                                                                                                                                                                                                                                                                                                                                                                                                                                                                                                                                                                                                                                                                                                                                                                                                                                                                                                                                                                                                                                                                                                                                                                                                                                                                                                                                                                                                                                                                                                                                                                                                                                                                                                                                                                                                                                                                                                                                                                                                                                                                                                                                                                                                                                                                                                                                                                                                                                                                                                                                                                                                                                                                                                                                                                                                                                                                                                                                                                                                                                                                                                                                                                                                                                                                                                                                                                                                                                                                                                                                                                                                                                                                                                                                                                                                                                                                                                                                                                                                                                                                                                                                                                                                                                                                                                                                                                                                                                                                                                                                                                                                                                                                                                                                                                                                                                                                                                                                                                                                                                           | Molekylær Medicinsk Afdeling, Aarhus University Hospital, Aarhus, Denmark                                  | Statens Serum Institut Bioinformatics and Microbial Genomics                                    | Danish Covid-19 Genome Consortium                                                                                                                                                                                                                                                                                                                                                                                                                                                                                  |
| EPI_ISL_7501186                                                                                                                                                                                                                                                                                                                                                                                                                                                                                                                                                                                                                                                                                                                                                                                                                                                                                                                                                                                                                                                                                                                                                                                                                                                                                                                                                                                                                                                                                                                                                                                                                                                                                                                                                                                                                                                                                                                                                                                                                                                                                                                                                                                                                                                                                                                                                                                                                                                                                                                                                                                                                                                                                                                                                                                                                                                                                                                                                                                                                                                                                                                                                                                                                                                                                                                                                                                                                                                                                                                                                                                                                                                                                                                                                                                                                                                                                                                                                                                                                                                                                                                                                                                                                                                                                                                                                                                                                                                                                                                                                                                                                                                                                                                                                                                                                                                                                                                                                                                                                                                                                                                                                                                                                                                                                                                                                                                                                                                                                                                                                                                                                                                                                                                                                                                                                                                                                                                                                                                                                                                                                                                                                                                                                                                                                                                                                                                                                                                                                                                                                                                                                                                                                                                                                                                                                                                                                                                                                                                                                                                                                                                                                                                                                                                                                                                                                                                                                                                                                                                                                                                                                                                                                                                                                                                                                                                                                                                                                                                                                                                                                                                                                                                                                                                                                                                                                                                                                                                                                                                                                                                                                                                                                                                                                                                                                                                                                                                                                                                                                                                                                                                                                                                                                                                                                                                                                                                                                                                                                                                                                                                                                                                                                                                                                                                                                                                                                                                                                                                                                                                                                                                                                                                                                                                                                                                                                                                                                                                                                                                                                                                                                                                                                                                                                                                                                                                                                                                                                                                                                                                                                               | Mount Auburn Hospital via Lahey Hospital                                                                   | New England Biolabs                                                                             | Abel, G.; B.W.; C.J.; Colgrove, R.; Duncan, R.; Elfahal, M.; Flynn; Heim, K.; Karolides, M.; L. and Langhorst; Michaels, L.; Pinet, K.; Skelton, T.; Sun                                                                                                                                                                                                                                                                                                                                                           |
| EPI_ISL_7545652, EPI_ISL_7545653, EPI_ISL_7545654, EPI_ISL_7545658, EPI_ISL_7545660, EPI_ISL_7545661, EPI_ISL_7545662, EPI_ISL_7545663, EPI_ISL_7545664, EPI_ISL_7545665, EPI_ISL_7545667, EPI_ISL_7545668, EPI_ISL_7545669, EPI_ISL_7545670, EPI_ISL_7545671, EPI_ISL_7545673, EPI_ISL_7545674, EPI_ISL_7545675                                                                                                                                                                                                                                                                                                                                                                                                                                                                                                                                                                                                                                                                                                                                                                                                                                                                                                                                                                                                                                                                                                                                                                                                                                                                                                                                                                                                                                                                                                                                                                                                                                                                                                                                                                                                                                                                                                                                                                                                                                                                                                                                                                                                                                                                                                                                                                                                                                                                                                                                                                                                                                                                                                                                                                                                                                                                                                                                                                                                                                                                                                                                                                                                                                                                                                                                                                                                                                                                                                                                                                                                                                                                                                                                                                                                                                                                                                                                                                                                                                                                                                                                                                                                                                                                                                                                                                                                                                                                                                                                                                                                                                                                                                                                                                                                                                                                                                                                                                                                                                                                                                                                                                                                                                                                                                                                                                                                                                                                                                                                                                                                                                                                                                                                                                                                                                                                                                                                                                                                                                                                                                                                                                                                                                                                                                                                                                                                                                                                                                                                                                                                                                                                                                                                                                                                                                                                                                                                                                                                                                                                                                                                                                                                                                                                                                                                                                                                                                                                                                                                                                                                                                                                                                                                                                                                                                                                                                                                                                                                                                                                                                                                                                                                                                                                                                                                                                                                                                                                                                                                                                                                                                                                                                                                                                                                                                                                                                                                                                                                                                                                                                                                                                                                                                                                                                                                                                                                                                                                                                                                                                                                                                                                                                                                                                                                                                                                                                                                                                                                                                                                                                                                                                                                                                                                                                                                                                                                                                                                                                                                                                                                                                                                                                                                                                                              | see above                                                                                                  | NHLS Livingstone Laboratory                                                                     | CERI, Centre for Epidemic Response and Innovation, Stellenbosch University and KRISP, KZN Research Innovation and Sequencing Platform, UKZN                                                                                                                                                                                                                                                                                                                                                                        |
| EPI_ISL_7381208, EPI_ISL_7381209, EPI_ISL_7381210, EPI_ISL_7381211, EPI_ISL_7381212, EPI_ISL_7381213, EPI_ISL_7381214, EPI_ISL_7381215, EPI_ISL_7381216, EPI_ISL_7381217, EPI_ISL_7381218, EPI_ISL_7381219, EPI_ISL_7381220, EPI_ISL_7381221, EPI_ISL_7381222                                                                                                                                                                                                                                                                                                                                                                                                                                                                                                                                                                                                                                                                                                                                                                                                                                                                                                                                                                                                                                                                                                                                                                                                                                                                                                                                                                                                                                                                                                                                                                                                                                                                                                                                                                                                                                                                                                                                                                                                                                                                                                                                                                                                                                                                                                                                                                                                                                                                                                                                                                                                                                                                                                                                                                                                                                                                                                                                                                                                                                                                                                                                                                                                                                                                                                                                                                                                                                                                                                                                                                                                                                                                                                                                                                                                                                                                                                                                                                                                                                                                                                                                                                                                                                                                                                                                                                                                                                                                                                                                                                                                                                                                                                                                                                                                                                                                                                                                                                                                                                                                                                                                                                                                                                                                                                                                                                                                                                                                                                                                                                                                                                                                                                                                                                                                                                                                                                                                                                                                                                                                                                                                                                                                                                                                                                                                                                                                                                                                                                                                                                                                                                                                                                                                                                                                                                                                                                                                                                                                                                                                                                                                                                                                                                                                                                                                                                                                                                                                                                                                                                                                                                                                                                                                                                                                                                                                                                                                                                                                                                                                                                                                                                                                                                                                                                                                                                                                                                                                                                                                                                                                                                                                                                                                                                                                                                                                                                                                                                                                                                                                                                                                                                                                                                                                                                                                                                                                                                                                                                                                                                                                                                                                                                                                                                                                                                                                                                                                                                                                                                                                                                                                                                                                                                                                                                                                                                                                                                                                                                                                                                                                                                                                                                                                                                                                                                                 | see above                                                                                                  | NHLS Port Elizabeth Laboratory                                                                  | CERI, Centre for Epidemic Response and Innovation, Stellenbosch University and KRISP, KZN Research Innovation and Sequencing Platform, UKZN.                                                                                                                                                                                                                                                                                                                                                                       |
| EPI_ISL_7462390, EPI_ISL_7462391, EPI_ISL_7462392, EPI_ISL_7462393, EPI_ISL_7462397, EPI_ISL_7462398, EPI_ISL_7462399, EPI_ISL_7462400, EPI_ISL_7462401, EPI_ISL_7462402, EPI_ISL_7462403, EPI_ISL_7462404                                                                                                                                                                                                                                                                                                                                                                                                                                                                                                                                                                                                                                                                                                                                                                                                                                                                                                                                                                                                                                                                                                                                                                                                                                                                                                                                                                                                                                                                                                                                                                                                                                                                                                                                                                                                                                                                                                                                                                                                                                                                                                                                                                                                                                                                                                                                                                                                                                                                                                                                                                                                                                                                                                                                                                                                                                                                                                                                                                                                                                                                                                                                                                                                                                                                                                                                                                                                                                                                                                                                                                                                                                                                                                                                                                                                                                                                                                                                                                                                                                                                                                                                                                                                                                                                                                                                                                                                                                                                                                                                                                                                                                                                                                                                                                                                                                                                                                                                                                                                                                                                                                                                                                                                                                                                                                                                                                                                                                                                                                                                                                                                                                                                                                                                                                                                                                                                                                                                                                                                                                                                                                                                                                                                                                                                                                                                                                                                                                                                                                                                                                                                                                                                                                                                                                                                                                                                                                                                                                                                                                                                                                                                                                                                                                                                                                                                                                                                                                                                                                                                                                                                                                                                                                                                                                                                                                                                                                                                                                                                                                                                                                                                                                                                                                                                                                                                                                                                                                                                                                                                                                                                                                                                                                                                                                                                                                                                                                                                                                                                                                                                                                                                                                                                                                                                                                                                                                                                                                                                                                                                                                                                                                                                                                                                                                                                                                                                                                                                                                                                                                                                                                                                                                                                                                                                                                                                                                                                                                                                                                                                                                                                                                                                                                                                                                                                                                                                                                    | see above                                                                                                  | NHLS Universitas Academic                                                                       | Division of Medical Virology, National Health Laboratory Service (NHLS), Tygerberg Hospital / Stellenbosch University                                                                                                                                                                                                                                                                                                                                                                                              |
| EPI_ISL_7605460,<br>EPI_ISL_7605516                                                                                                                                                                                                                                                                                                                                                                                                                                                                                                                                                                                                                                                                                                                                                                                                                                                                                                                                                                                                                                                                                                                                                                                                                                                                                                                                                                                                                                                                                                                                                                                                                                                                                                                                                                                                                                                                                                                                                                                                                                                                                                                                                                                                                                                                                                                                                                                                                                                                                                                                                                                                                                                                                                                                                                                                                                                                                                                                                                                                                                                                                                                                                                                                                                                                                                                                                                                                                                                                                                                                                                                                                                                                                                                                                                                                                                                                                                                                                                                                                                                                                                                                                                                                                                                                                                                                                                                                                                                                                                                                                                                                                                                                                                                                                                                                                                                                                                                                                                                                                                                                                                                                                                                                                                                                                                                                                                                                                                                                                                                                                                                                                                                                                                                                                                                                                                                                                                                                                                                                                                                                                                                                                                                                                                                                                                                                                                                                                                                                                                                                                                                                                                                                                                                                                                                                                                                                                                                                                                                                                                                                                                                                                                                                                                                                                                                                                                                                                                                                                                                                                                                                                                                                                                                                                                                                                                                                                                                                                                                                                                                                                                                                                                                                                                                                                                                                                                                                                                                                                                                                                                                                                                                                                                                                                                                                                                                                                                                                                                                                                                                                                                                                                                                                                                                                                                                                                                                                                                                                                                                                                                                                                                                                                                                                                                                                                                                                                                                                                                                                                                                                                                                                                                                                                                                                                                                                                                                                                                                                                                                                                                                                                                                                                                                                                                                                                                                                                                                                                                                                                                                                           | NJDOH, Public Health and Environmental Laboratories                                                        | NJ_PHEL                                                                                         | Allison Roder; Byeong Jeong; Chelsea San Filippo; Dana Woel; Jacquelyn Devereil; Lindsey Bodnar; Maria-Magdalene Pugliese; Mohammad M. Ali; Ryan Pachucki; Shiv K. Verma                                                                                                                                                                                                                                                                                                                                           |
| EPI_ISL_7568605,<br>EPI_ISL_7568608                                                                                                                                                                                                                                                                                                                                                                                                                                                                                                                                                                                                                                                                                                                                                                                                                                                                                                                                                                                                                                                                                                                                                                                                                                                                                                                                                                                                                                                                                                                                                                                                                                                                                                                                                                                                                                                                                                                                                                                                                                                                                                                                                                                                                                                                                                                                                                                                                                                                                                                                                                                                                                                                                                                                                                                                                                                                                                                                                                                                                                                                                                                                                                                                                                                                                                                                                                                                                                                                                                                                                                                                                                                                                                                                                                                                                                                                                                                                                                                                                                                                                                                                                                                                                                                                                                                                                                                                                                                                                                                                                                                                                                                                                                                                                                                                                                                                                                                                                                                                                                                                                                                                                                                                                                                                                                                                                                                                                                                                                                                                                                                                                                                                                                                                                                                                                                                                                                                                                                                                                                                                                                                                                                                                                                                                                                                                                                                                                                                                                                                                                                                                                                                                                                                                                                                                                                                                                                                                                                                                                                                                                                                                                                                                                                                                                                                                                                                                                                                                                                                                                                                                                                                                                                                                                                                                                                                                                                                                                                                                                                                                                                                                                                                                                                                                                                                                                                                                                                                                                                                                                                                                                                                                                                                                                                                                                                                                                                                                                                                                                                                                                                                                                                                                                                                                                                                                                                                                                                                                                                                                                                                                                                                                                                                                                                                                                                                                                                                                                                                                                                                                                                                                                                                                                                                                                                                                                                                                                                                                                                                                                                                                                                                                                                                                                                                                                                                                                                                                                                                                                                                                           | NYU Langone Health                                                                                         | Departments of Pathology and Medicine, New York University School of Medicine                   | Adriana Heguy; Christian Marier; Dacia Dimartino; Emily Guzman; Gael Westby; Guiqing Wang; Paul Zapplie; Peter Meyn; Sitharam Ramaswami; Yutong Zhang                                                                                                                                                                                                                                                                                                                                                              |
| EPI_ISL_7285023                                                                                                                                                                                                                                                                                                                                                                                                                                                                                                                                                                                                                                                                                                                                                                                                                                                                                                                                                                                                                                                                                                                                                                                                                                                                                                                                                                                                                                                                                                                                                                                                                                                                                                                                                                                                                                                                                                                                                                                                                                                                                                                                                                                                                                                                                                                                                                                                                                                                                                                                                                                                                                                                                                                                                                                                                                                                                                                                                                                                                                                                                                                                                                                                                                                                                                                                                                                                                                                                                                                                                                                                                                                                                                                                                                                                                                                                                                                                                                                                                                                                                                                                                                                                                                                                                                                                                                                                                                                                                                                                                                                                                                                                                                                                                                                                                                                                                                                                                                                                                                                                                                                                                                                                                                                                                                                                                                                                                                                                                                                                                                                                                                                                                                                                                                                                                                                                                                                                                                                                                                                                                                                                                                                                                                                                                                                                                                                                                                                                                                                                                                                                                                                                                                                                                                                                                                                                                                                                                                                                                                                                                                                                                                                                                                                                                                                                                                                                                                                                                                                                                                                                                                                                                                                                                                                                                                                                                                                                                                                                                                                                                                                                                                                                                                                                                                                                                                                                                                                                                                                                                                                                                                                                                                                                                                                                                                                                                                                                                                                                                                                                                                                                                                                                                                                                                                                                                                                                                                                                                                                                                                                                                                                                                                                                                                                                                                                                                                                                                                                                                                                                                                                                                                                                                                                                                                                                                                                                                                                                                                                                                                                                                                                                                                                                                                                                                                                                                                                                                                                                                                                                                               | National Centre for Disease Control (NCDC) Biotechnology Division, Delhi                                   | NCDC Delhi, Biotechnology Division INSACOG                                                      | Hema Gogia; Hemlata Lali; Kalaiarasan Ponnusamy; Mahesh S Dhar; Manoj K Singh; Meena Datta; Partha Rakshit; Preeti Madan; Priyanka Singh; Radhakrishnan V. S; Robin Marwal; Sandhya Kabra; Sujeet K Singh; Uma Sharma                                                                                                                                                                                                                                                                                              |
| EPI_ISL_7548907, EPI_ISL_7548908, EPI_ISL_7548911, EPI_ISL_7548912, EPI_ISL_7548913, EPI_ISL_7548915, EPI_ISL_7548916, EPI_ISL_7548918, EPI_ISL_7548919, EPI_ISL_7548921, EPI_ISL_7548922, EPI_ISL_7548924, EPI_ISL_7548925, EPI_ISL_7548926, EPI_ISL_7548927, EPI_ISL_7548928, EPI_ISL_7548929, EPI_ISL_7548930, EPI_ISL_7548932, EPI_ISL_7548933, EPI_ISL_7548934, EPI_ISL_7548935, EPI_ISL_7548936, EPI_ISL_7548937, EPI_ISL_7548938, EPI_ISL_7548939, EPI_ISL_7552700, EPI_ISL_7552701, EPI_ISL_7552702, EPI_ISL_7552703, EPI_ISL_7552704, EPI_ISL_7552705, EPI_ISL_7552706, EPI_ISL_7552707, EPI_ISL_7552708, EPI_ISL_7552709, EPI_ISL_7552710                                                                                                                                                                                                                                                                                                                                                                                                                                                                                                                                                                                                                                                                                                                                                                                                                                                                                                                                                                                                                                                                                                                                                                                                                                                                                                                                                                                                                                                                                                                                                                                                                                                                                                                                                                                                                                                                                                                                                                                                                                                                                                                                                                                                                                                                                                                                                                                                                                                                                                                                                                                                                                                                                                                                                                                                                                                                                                                                                                                                                                                                                                                                                                                                                                                                                                                                                                                                                                                                                                                                                                                                                                                                                                                                                                                                                                                                                                                                                                                                                                                                                                                                                                                                                                                                                                                                                                                                                                                                                                                                                                                                                                                                                                                                                                                                                                                                                                                                                                                                                                                                                                                                                                                                                                                                                                                                                                                                                                                                                                                                                                                                                                                                                                                                                                                                                                                                                                                                                                                                                                                                                                                                                                                                                                                                                                                                                                                                                                                                                                                                                                                                                                                                                                                                                                                                                                                                                                                                                                                                                                                                                                                                                                                                                                                                                                                                                                                                                                                                                                                                                                                                                                                                                                                                                                                                                                                                                                                                                                                                                                                                                                                                                                                                                                                                                                                                                                                                                                                                                                                                                                                                                                                                                                                                                                                                                                                                                                                                                                                                                                                                                                                                                                                                                                                                                                                                                                                                                                                                                                                                                                                                                                                                                                                                                                                                                                                                                                                                                                                                                                                                                                                                                                                                                                                                                                                                                                                                                                                           | see above                                                                                                  | National Health Laboratory                                                                      | Botswana Harvard AIDS Institute Partnership, Plot 1836 North Ring Road, Princess Marina Hospital, Gaborone                                                                                                                                                                                                                                                                                                                                                                                                         |
| EPI_ISL_6795195, EPI_ISL_6795199, EPI_ISL_6795202, EPI_ISL_6795203, EPI_ISL_6795406, EPI_ISL_7015210, EPI_ISL_7015212, EPI_ISL_7015216, EPI_ISL_7015223, EPI_ISL_7015224, EPI_ISL_7015226, EPI_ISL_7015229, EPI_ISL_7015230, EPI_ISL_7310589, EPI_ISL_7310595, EPI_ISL_7310605, EPI_ISL_7310613, EPI_ISL_7310622, EPI_ISL_7310630, EPI_ISL_7310631, EPI_ISL_7310636, EPI_ISL_7310643, EPI_ISL_7310648, EPI_ISL_7310658, EPI_ISL_7310666, EPI_ISL_7310675, EPI_ISL_7310679, EPI_ISL_7310685, EPI_ISL_7310703, EPI_ISL_7310710, EPI_ISL_7310719, EPI_ISL_7310725, EPI_ISL_7310742, EPI_ISL_7310747, EPI_ISL_7358050, EPI_ISL_7358051, EPI_ISL_7358052, EPI_ISL_7358053, EPI_ISL_7358054, EPI_ISL_7358055, EPI_ISL_7358056, EPI_ISL_7358059, EPI_ISL_7358064, EPI_ISL_7358065, EPI_ISL_7358066, EPI_ISL_7358067, EPI_ISL_7358068, EPI_ISL_7358069, EPI_ISL_7358071, EPI_ISL_7358073, EPI_ISL_7358074, EPI_ISL_7358075, EPI_ISL_7358076, EPI_ISL_7358077, EPI_ISL_7358078, EPI_ISL_7358079, EPI_ISL_7358080, EPI_ISL_7358081, EPI_ISL_7358082, EPI_ISL_7358083, EPI_ISL_7358084, EPI_ISL_7358085, EPI_ISL_7358089, EPI_ISL_7358090, EPI_ISL_7358091, EPI_ISL_7358092, EPI_ISL_7358093, EPI_ISL_7381192, EPI_ISL_7381193, EPI_ISL_7381194, EPI_ISL_7381195, EPI_ISL_7381196, EPI_ISL_7381197, EPI_ISL_7381198, EPI_ISL_7381199, EPI_ISL_7381200, EPI_ISL_7381201, EPI_ISL_7381202, EPI_ISL_7381203, EPI_ISL_7381204, EPI_ISL_7381205, EPI_ISL_7381206, EPI_ISL_7381207, EPI_ISL_7381208, EPI_ISL_7381209, EPI_ISL_7381210, EPI_ISL_7381211, EPI_ISL_7381212, EPI_ISL_7381213, EPI_ISL_7381214, EPI_ISL_7381215, EPI_ISL_7381216, EPI_ISL_7381217, EPI_ISL_7381218, EPI_ISL_7381219, EPI_ISL_7381220, EPI_ISL_7381221, EPI_ISL_7381222, EPI_ISL_7381223, EPI_ISL_7381224, EPI_ISL_7381225, EPI_ISL_7381226, EPI_ISL_7381227, EPI_ISL_7381228, EPI_ISL_7381229, EPI_ISL_7381230, EPI_ISL_7381231, EPI_ISL_7381232, EPI_ISL_7381233, EPI_ISL_7381234, EPI_ISL_7381235, EPI_ISL_7381236, EPI_ISL_7381237, EPI_ISL_7381238, EPI_ISL_7381239, EPI_ISL_7381240, EPI_ISL_7381241, EPI_ISL_7381242, EPI_ISL_7381243, EPI_ISL_7381244, EPI_ISL_7381245, EPI_ISL_7381246, EPI_ISL_7381247, EPI_ISL_7381248, EPI_ISL_7381249, EPI_ISL_7381250, EPI_ISL_7381251, EPI_ISL_7381252, EPI_ISL_7381253, EPI_ISL_7381254, EPI_ISL_7381255, EPI_ISL_7381256, EPI_ISL_7381257, EPI_ISL_7381258, EPI_ISL_7381259, EPI_ISL_7381260, EPI_ISL_7381261, EPI_ISL_7381262, EPI_ISL_7381263, EPI_ISL_7381264, EPI_ISL_7381265, EPI_ISL_7381266, EPI_ISL_7381267, EPI_ISL_7381268, EPI_ISL_7381269, EPI_ISL_7381270, EPI_ISL_7381271, EPI_ISL_7381272, EPI_ISL_7381273, EPI_ISL_7381274, EPI_ISL_7381275, EPI_ISL_7381276, EPI_ISL_7381277, EPI_ISL_7381278, EPI_ISL_7381279, EPI_ISL_7381280, EPI_ISL_7381281, EPI_ISL_7381282, EPI_ISL_7381283, EPI_ISL_7381284, EPI_ISL_7381285, EPI_ISL_7381286, EPI_ISL_7381287, EPI_ISL_7381288, EPI_ISL_7381289, EPI_ISL_7381290, EPI_ISL_7381291, EPI_ISL_7381292, EPI_ISL_7381293, EPI_ISL_7381294, EPI_ISL_7381295, EPI_ISL_7381296, EPI_ISL_7381297, EPI_ISL_7381298, EPI_ISL_7381299, EPI_ISL_7381300, EPI_ISL_7381301, EPI_ISL_7381302, EPI_ISL_7381303, EPI_ISL_7381304, EPI_ISL_7381305, EPI_ISL_7381306, EPI_ISL_7381307, EPI_ISL_7381308, EPI_ISL_7381309, EPI_ISL_7381310, EPI_ISL_7381311, EPI_ISL_7381312, EPI_ISL_7381313, EPI_ISL_7381314, EPI_ISL_7381315, EPI_ISL_7381316, EPI_ISL_7381317, EPI_ISL_7381318, EPI_ISL_7381319, EPI_ISL_7381320, EPI_ISL_7381321, EPI_ISL_7381322, EPI_ISL_7381323, EPI_ISL_7381324, EPI_ISL_7381325, EPI_ISL_7381326, EPI_ISL_7381327, EPI_ISL_7381328, EPI_ISL_7381329, EPI_ISL_7381330, EPI_ISL_7381331, EPI_ISL_7381332, EPI_ISL_7381333, EPI_ISL_7381334, EPI_ISL_7381335, EPI_ISL_7381336, EPI_ISL_7381337, EPI_ISL_7381338, EPI_ISL_7381339, EPI_ISL_7381340, EPI_ISL_7381341, EPI_ISL_7381342, EPI_ISL_7381343, EPI_ISL_7381344, EPI_ISL_7381345, EPI_ISL_7381346, EPI_ISL_7381347, EPI_ISL_7381348, EPI_ISL_7381349, EPI_ISL_7381350, EPI_ISL_7381351, EPI_ISL_7381352, EPI_ISL_7381353, EPI_ISL_7381354, EPI_ISL_7381355, EPI_ISL_7381356, EPI_ISL_7381357, EPI_ISL_7381358, EPI_ISL_7381359, EPI_ISL_7381360, EPI_ISL_7381361, EPI_ISL_7381362, EPI_ISL_7381363, EPI_ISL_7381364, EPI_ISL_7381365, EPI_ISL_7381366, EPI_ISL_7381367, EPI_ISL_7381368, EPI_ISL_7381369, EPI_ISL_7381370, EPI_ISL_7381371, EPI_ISL_7381372, EPI_ISL_7381373, EPI_ISL_7381374, EPI_ISL_7381375, EPI_ISL_7381376, EPI_ISL_7381377, EPI_ISL_7381378, EPI_ISL_7381379, EPI_ISL_7381380, EPI_ISL_7381381, EPI_ISL_7381382, EPI_ISL_7381383, EPI_ISL_7381384, EPI_ISL_7381385, EPI_ISL_7381386, EPI_ISL_7381387, EPI_ISL_7381388, EPI_ISL_7381389, EPI_ISL_7381390, EPI_ISL_7381391, EPI_ISL_7381392, EPI_ISL_7381393, EPI_ISL_7381394, EPI_ISL_7381395, EPI_ISL_7381396, EPI_ISL_7381397, EPI_ISL_7381398, EPI_ISL_7381399, EPI_ISL_7381400, EPI_ISL_7381401, EPI_ISL_7381402, EPI_ISL_7381403, EPI_ISL_7381404, EPI_ISL_7381405, EPI_ISL_7381406, EPI_ISL_7381407, EPI_ISL_7381408, EPI_ISL_7381409, EPI_ISL_7381410, EPI_ISL_7381411, EPI_ISL_7381412, EPI_ISL_7381413, EPI_ISL_7381414, EPI_ISL_7381415, EPI_ISL_7381416, EPI_ISL_7381417, EPI_ISL_7381418, EPI_ISL_7381419, EPI_ISL_7381420, EPI_ISL_7381421, EPI_ISL_7381422, EPI_ISL_7381423, EPI_ISL_7381424, EPI_ISL_7381425, EPI_ISL_7381426, EPI_ISL_7381427, EPI_ISL_7381428, EPI_ISL_7381429, EPI_ISL_7381430, EPI_ISL_7381431, EPI_ISL_7381432, EPI_ISL_7381433, EPI_ISL_7381434, EPI_ISL_7381435, EPI_ISL_7381436, EPI_ISL_7381437, EPI_ISL_7381438, EPI_ISL_7381439, EPI_ISL_7381440, EPI_ISL_7381441, EPI_ISL_7381442, EPI_ISL_7381443, EPI_ISL_7381444, EPI_ISL_7381445, EPI_ISL_7381446, EPI_ISL_7381447, EPI_ISL_7381448, EPI_ISL_7381449, EPI_ISL_7381450, EPI_ISL_7381451, EPI_ISL_7381452, EPI_ISL_7381453, EPI_ISL_7381454, EPI_ISL_7381455, EPI_ISL_7381456, EPI_ISL_7381457, EPI_ISL_7381458, EPI_ISL_7381459, EPI_ISL_7381460, EPI_ISL_7381461, EPI_ISL_7381462, EPI_ISL_7381463, EPI_ISL_7381464, EPI_ISL_7381465, EPI_ISL_7381466, EPI_ISL_7381467, EPI_ISL_7381468, EPI_ISL_7381469, EPI_ISL_7381470, EPI_ISL_7381471, EPI_ISL_7381472, EPI_ISL_7381473, EPI_ISL_7381474, EPI_ISL_7381475, EPI_ISL_7381476, EPI_ISL_7381477, EPI_ISL_7381478, EPI_ISL_7381479, EPI_ISL_7381480, EPI_ISL_7381481, EPI_ISL_7381482, EPI_ISL_7381483, EPI_ISL_7381484, EPI_ISL_7381485, EPI_ISL_7381486, EPI_ISL_7381487, EPI_ISL_7381488, EPI_ISL_7381489, EPI_ISL_7381490, EPI_ISL_7381491, EPI_ISL_7381492, EPI_ISL_7381493, EPI_ISL_7381494, EPI_ISL_7381495, EPI_ISL_7381496, EPI_ISL_7381497, EPI_ISL_7381498, EPI_ISL_7381499, EPI_ISL_7381500, EPI_ISL_7381501, EPI_ISL_7381502, EPI_ISL_7381503, EPI_ISL_7381504, EPI_ISL_7381505, EPI_ISL_7381506, EPI_ISL_7381507, EPI_ISL_7381508, EPI_ISL_7381509, EPI_ISL_7381510, EPI_ISL_7381511, EPI_ISL_7381512, EPI_ISL_7381513, EPI_ISL_7381514, EPI_ISL_7381515, EPI_ISL_7381516, EPI_ISL_7381517, EPI_ISL_7381518, EPI_ISL_7381519, EPI_ISL_7381520, EPI_ISL_7381521, EPI_ISL_7381522, EPI_ISL_7381523, EPI_ISL_7381524, EPI_ISL_7381525, EPI_ISL_7381526, EPI_ISL_7381527, EPI_ISL_7381528, EPI_ISL_7381529, EPI_ISL_7381530, EPI_ISL_7381531, EPI_ISL_7381532, EPI_ISL_7381533, EPI_ISL_7381534, EPI_ISL_7381535, EPI_ISL_7381536, EPI_ISL_7381537, EPI_ISL_7381538, EPI_ISL_7381539, EPI_ISL_7381540, EPI_ISL_7381541, EPI_ISL_7381542, EPI_ISL_7381543, EPI_ISL_7381544, EPI_ISL_7381545, EPI_ISL_7381546, EPI_ISL_7381547, EPI_ISL_7381548, EPI_ISL_7381549, EPI_ISL_7381550, EPI_ISL_7381551, EPI_ISL_7381552, EPI_ISL_7381553, EPI_ISL_7381554, EPI_ISL_7381555, EPI_ISL_7381556, EPI_ISL_7381557, EPI_ISL_7381558, EPI_ISL_7381559, EPI_ISL_7381560, EPI_ISL_7381561, EPI_ISL_7381562, EPI_ISL_7381563, EPI_ISL_7381564, EPI_ISL_7381565, EPI_ISL_7381566, EPI_ISL_7381567, EPI_ISL_7381568, EPI_ISL_7381569, EPI_ISL_7381570, EPI_ISL_7381571, EPI_ISL_7381572, EPI_ISL_7381573, EPI_ISL_7381574, EPI_ISL_7381575, EPI_ISL_7381576, EPI_ISL_7381577, EPI_ISL_7381578, EPI_ISL_7381579, EPI_ISL_7381580, EPI_ISL_7381581, EPI_ISL_7381582, EPI_ISL_7381583, EPI_ISL_7381584, EPI_ISL_7381585, EPI_ISL_7381586, EPI_ISL_7381587, EPI_ISL_7381588, EPI_ISL_7381589, EPI_ISL_7381590, EPI_ISL_7381591, EPI_ISL_7381592, EPI_ISL_7381593, EPI_ISL_7381594, EPI_ISL_7381595, EPI_ISL_7381596, EPI_ISL_7381597, EPI_ISL_7381598, EPI_ISL_7381599, EPI_ISL_7381600, EPI_ISL_7381601, EPI_ISL_7381602, EPI_ISL_7381603, EPI_ISL_7381604, EPI_ISL_7381605, EPI_ISL_7381606, EPI_ISL_7381607, EPI_ISL_7381608, EPI_ISL_7381609, EPI_ISL_7381610, EPI_ISL_7381611, EPI_ISL_7381612, EPI_ISL_7381613, EPI_ISL_7381614, EPI_ISL_7381615, EPI_ISL_7381616, EPI_ISL_7381617, EPI_ISL_7381618, EPI_ISL_7381619, EPI_ISL_7381620, EPI_ISL_7381621, EPI_ISL_7381622, EPI_ISL_7381623, EPI_ISL_7381624, EPI_ISL_7381625, EPI_ISL_7381626, EPI_ISL_7381627, EPI_ISL_7381628, EPI_ISL_7381629, EPI_ISL_7381630, EPI_ISL_7381631, EPI_ISL_7381632, EPI_ISL_7381633, EPI_ISL_7381634, EPI_ISL_7381635, EPI_ISL_7381636, EPI_ISL_7381637, EPI_ISL_7381638, EPI_ISL_7381639, EPI_ISL_7381640, EPI_ISL_7381641, EPI_ISL_7381642, EPI_ISL_7381643, EPI_ISL_7381644, EPI_ISL_7381645, EPI_ISL_7381646, EPI_ISL_7381647, EPI_ISL_7381648, EPI_ISL_7381649, EPI_ISL_7381650, EPI_ISL_7381651, EPI_ISL_7381652, EPI_ISL_7381653, EPI_ISL_7381654, EPI_ISL_7381655, EPI_ISL_7381656, EPI_ISL_7381657, EPI_ISL_7381658, EPI_ISL_7381659, EPI_ISL_7381660, EPI_ISL_7381661, EPI_ISL_7381662, EPI_ISL_7381663, EPI_ISL_7381664, EPI_ISL_7381665, EPI_ISL_7381666, EPI_ISL_7381667, EPI_ISL_7381668, EPI_ISL_7381669, EPI_ISL_7381670, EPI_ISL_7381671, EPI_ISL_7381672, EPI_ISL_7381673, EPI_ISL_7381674, EPI_ISL_7381675, EPI_ISL_7381676, EPI_ISL_7381677, EPI_ISL_7381678, EPI_ISL_7381679, EPI_ISL_7381680, EPI_ISL_7381681, EPI_ISL_7381682, EPI_ISL_7381683, EPI_ISL_7381684, EPI_ISL_7381685, EPI_ISL_7381686, EPI_ISL_7381687, EPI_ISL_7381688, EPI_ISL_7381689, EPI_ISL_7381690, EPI_ISL_7381691, EPI_ISL_7381692, EPI_ISL_7381693, EPI_ISL_7381694, EPI_ISL_7381695, EPI_ISL_7381696, EPI_ISL_7381697, EPI_ISL_7381698, EPI_ISL_7381699, EPI_ISL_7381700, EPI_ISL_7381701, EPI_ISL_7381702, EPI_ISL_7381703, EPI_ISL_7381704, EPI_ISL_7381705, EPI_ISL_7381706, EPI_ISL_7381707, EPI_ISL_7381708, EPI_ISL_7381709, EPI_ISL_7381710, EPI_ISL_7381711, EPI_ISL_7381712, EPI_ISL_7381713, EPI_ISL_7381714, EPI_ISL_7381715, EPI_ISL_7381716, EPI_ISL_7381717, EPI_ISL_7381718, EPI_ISL_7381719, EPI_ISL_7381720, EPI_ISL_7381721, EPI_ISL_7381722, EPI_ISL_7381723, EPI_ISL_7381724, EPI_ISL_7381725, EPI_ISL_7381726, EPI_ISL_7381727, EPI_ISL_7381728, EPI_ISL_7381729, EPI_ISL_7381730, EPI_ISL_7381731, EPI_ISL_7381732, EPI_ISL_7381733, EPI_ISL_7381734, EPI_ISL_7381735, EPI_ISL_7381736, EPI_ISL_7381737, EPI_ISL_7381738, EPI_ISL_7381739, EPI_ISL_7381740, EPI_ISL_7381741, EPI_ISL_7381742, EPI_ISL_7381743, EPI_ISL_7381744, EPI_ISL_7381745, EPI_ISL_7381746, EPI_ISL_7381747, EPI_ISL_7381748, EPI_ISL_7381749, EPI_ISL_7381750, EPI_ISL_7381751, EPI_ISL_73 |                                                                                                            |                                                                                                 |                                                                                                                                                                                                                                                                                                                                                                                                                                                                                                                    |



|                                                                                                                                                                                                                                                                                                                                                                                                                                                                                                                                                                                                                                                                                                                                                                                                                                                                                                                                                                                                                                                            |           |                                                                                                                        |                                                                                                                                              |                                                                                                                                                                                                                                                                                                                                                                                                                                                                                            |
|------------------------------------------------------------------------------------------------------------------------------------------------------------------------------------------------------------------------------------------------------------------------------------------------------------------------------------------------------------------------------------------------------------------------------------------------------------------------------------------------------------------------------------------------------------------------------------------------------------------------------------------------------------------------------------------------------------------------------------------------------------------------------------------------------------------------------------------------------------------------------------------------------------------------------------------------------------------------------------------------------------------------------------------------------------|-----------|------------------------------------------------------------------------------------------------------------------------|----------------------------------------------------------------------------------------------------------------------------------------------|--------------------------------------------------------------------------------------------------------------------------------------------------------------------------------------------------------------------------------------------------------------------------------------------------------------------------------------------------------------------------------------------------------------------------------------------------------------------------------------------|
| EPI_ISL_6795189,<br>EPI_ISL_6795190,<br>EPI_ISL_6795191,<br>EPI_ISL_6795192,<br>EPI_ISL_6795193                                                                                                                                                                                                                                                                                                                                                                                                                                                                                                                                                                                                                                                                                                                                                                                                                                                                                                                                                            | Virology  | and Innovation, Stellenbosch University and KRISP, KZN Research Innovation and Sequencing Platform, UKZN.              |                                                                                                                                              |                                                                                                                                                                                                                                                                                                                                                                                                                                                                                            |
| EPI_ISL_6699728, EPI_ISL_6699729, EPI_ISL_6699730, EPI_ISL_6699731, EPI_ISL_6699732, EPI_ISL_6699733, EPI_ISL_6699734, EPI_ISL_6699735, EPI_ISL_6699736, EPI_ISL_6699737, EPI_ISL_6699738, EPI_ISL_6699739, EPI_ISL_6699740, EPI_ISL_6699741, EPI_ISL_6699742, EPI_ISL_6699743, EPI_ISL_6699744, EPI_ISL_6699745, EPI_ISL_6699746, EPI_ISL_6699747, EPI_ISL_6699748, EPI_ISL_6699749, EPI_ISL_6699750, EPI_ISL_6699751, EPI_ISL_6699752, EPI_ISL_6699753, EPI_ISL_6699754, EPI_ISL_6699755, EPI_ISL_6699756, EPI_ISL_6699757, EPI_ISL_6699758, EPI_ISL_6699759, EPI_ISL_6699760, EPI_ISL_6699761, EPI_ISL_6699762, EPI_ISL_6699763, EPI_ISL_6699764, EPI_ISL_6699765, EPI_ISL_6699766, EPI_ISL_6699767, EPI_ISL_6699768, EPI_ISL_6699769, EPI_ISL_6699770, EPI_ISL_6699771, EPI_ISL_6782043, EPI_ISL_6782055, EPI_ISL_6782056, EPI_ISL_6782071, EPI_ISL_6782072, EPI_ISL_6782079, EPI_ISL_6782080, EPI_ISL_6782084, EPI_ISL_6782090, EPI_ISL_6782092, EPI_ISL_6810482, EPI_ISL_6810483, EPI_ISL_6810484, EPI_ISL_6810485, EPI_ISL_6810486, EPI_ISL_6810487 | see above | National Health Laboratory Services, Virology, Charlotte Maxeke Johannesburg hospital, Parktown, Johannesburg, Gauteng | CERI, Centre for Epidemic Response and Innovation, Stellenbosch University and KRISP, KZN Research Innovation and Sequencing Platform, UKZN. | Amoaka D; Arisha Maharaj; Avani Bharuthram; Bester P; Bhiman J; Engelbrecht S; Everatt J; Florette Treurnicht; Goedhals D; Hardie D; Hsiao M; Iranzadeh A; Kathleen Subramoney; Lessells R; Makatini Z; Maoponga T; Mdalose N; Mlisana K; Moir M; NGS-SA (Scheepers C; Naidoo Y; Nkhensani Mtleni; Nyaga M) Giandhari J; Oluwakemi M; Pillay S; Preiser W; Ramphal U; Ramphal Y; San JE; Tegally H; Tshiabula D; Venter M; Wilkinson E; Williamson C; de Oliveira T; von Gottberg A        |
| EPI_ISL_6939033, EPI_ISL_6939034, EPI_ISL_6939035, EPI_ISL_6939036, EPI_ISL_6939038, EPI_ISL_6939039, EPI_ISL_6939041, EPI_ISL_6939042, EPI_ISL_6939043, EPI_ISL_6939044, EPI_ISL_6939045, EPI_ISL_6939046, EPI_ISL_6939047, EPI_ISL_6939048, EPI_ISL_6939049, EPI_ISL_6939050, EPI_ISL_6939051, EPI_ISL_6939052, EPI_ISL_6939053, EPI_ISL_6939054, EPI_ISL_6939056, EPI_ISL_6939058, EPI_ISL_6939059, EPI_ISL_6939060, EPI_ISL_6939061, EPI_ISL_6939062, EPI_ISL_6939063, EPI_ISL_6939064, EPI_ISL_6939065, EPI_ISL_6939066, EPI_ISL_6939067, EPI_ISL_6939068, EPI_ISL_6939069, EPI_ISL_7661055, EPI_ISL_7661056, EPI_ISL_7661094, EPI_ISL_7661095, EPI_ISL_7661096, EPI_ISL_7661098                                                                                                                                                                                                                                                                                                                                                                      | see above | National Influenza Centre                                                                                              | National Influenza Centre                                                                                                                    | ; Benjamin B. Lindsey; Benjamin H. Foulkes; Bless Seyram Agbenyo; Bright Adu; Ernest Asiedu; Franklin Asiedu-Bekoe; Hilda Opoku Frempong; Ivy A. Asante; Joseph Oliver-Commy; Joyce Appiah-Kubi; Keren Okyereba Attiku; Linda Boatemaa; Loreta Kwahah; Mathew D. Parker; Michael Marks; Mildred Adusei-Poku; Quaneeta Mohhtar; Sharon Hsu; Thushan I de Silva; William K. Ampofo                                                                                                           |
| EPI_ISL_7456448, EPI_ISL_7456450, EPI_ISL_7456451, EPI_ISL_7456452, EPI_ISL_7456453, EPI_ISL_7456454, EPI_ISL_7456455, EPI_ISL_7456456, EPI_ISL_7456457                                                                                                                                                                                                                                                                                                                                                                                                                                                                                                                                                                                                                                                                                                                                                                                                                                                                                                    | see above | National Institute For Communicable Diseases Of The National Health Laboratory Service                                 | National Institute for Communicable Diseases of the National Health Laboratory Service                                                       | Amoaka DG; Bhiman JN; Everatt J; Ismail A; Mahlangu B; Mnguni A; Mohale T; Ntuli N; Scheepers C; Wolter N                                                                                                                                                                                                                                                                                                                                                                                  |
| EPI_ISL_7605585, EPI_ISL_7605586, EPI_ISL_7605593, EPI_ISL_7605594, EPI_ISL_7605629, EPI_ISL_7605630, EPI_ISL_7605631, EPI_ISL_7605632, EPI_ISL_7605637, EPI_ISL_7605638, EPI_ISL_7605666, EPI_ISL_7605720, EPI_ISL_7605759, EPI_ISL_7605762, EPI_ISL_7605765, EPI_ISL_7605767, EPI_ISL_7605768, EPI_ISL_7605770, EPI_ISL_7605771                                                                                                                                                                                                                                                                                                                                                                                                                                                                                                                                                                                                                                                                                                                          | see above | National Institute for Communicable Diseases of the National Health Laboratory Service                                 | National Institute for Communicable Diseases of the National Health Laboratory Service                                                       | Amoaka DG; Bhiman JN; Everatt J; Ismail A; Mahlangu B; Mnguni A; Mohale T; Ntuli N; Scheepers C; Wolter N                                                                                                                                                                                                                                                                                                                                                                                  |
| EPI_ISL_7418017, EPI_ISL_7571617, EPI_ISL_7571618                                                                                                                                                                                                                                                                                                                                                                                                                                                                                                                                                                                                                                                                                                                                                                                                                                                                                                                                                                                                          |           | National Institute of Infectious Diseases                                                                              | National Institute of Infectious Diseases                                                                                                    | Harutaka Katano; Ken Maeda; Kentaro Itokawa; Makoto Kuroda; Shuetsu Fukushima; Shun Iida; Tadaki Suzuki; Tsuyoshi Sekizuka; Yudai Kuroda                                                                                                                                                                                                                                                                                                                                                   |
| EPI_ISL_7021517, EPI_ISL_7074135                                                                                                                                                                                                                                                                                                                                                                                                                                                                                                                                                                                                                                                                                                                                                                                                                                                                                                                                                                                                                           |           | National Platform bis COVID ULB-IBC                                                                                    | National Platform bis COVID ULB-IBC                                                                                                          | Arnaud Marchant; Benoit Haerlingen; Coralie Henin; Marie-Luce Delforge; Ricardo De Mendonca                                                                                                                                                                                                                                                                                                                                                                                                |
| EPI_ISL_7063764, EPI_ISL_7288348, EPI_ISL_7288357, EPI_ISL_7288375, EPI_ISL_7544936, EPI_ISL_7544937, EPI_ISL_7544938, EPI_ISL_7544939, EPI_ISL_7544940, EPI_ISL_7544941, EPI_ISL_7544942, EPI_ISL_7544943, EPI_ISL_7544944, EPI_ISL_7544945, EPI_ISL_7544946, EPI_ISL_7544947, EPI_ISL_7544972, EPI_ISL_7544974, EPI_ISL_7544975, EPI_ISL_7544980, EPI_ISL_7651290, EPI_ISL_7651294, EPI_ISL_7651298, EPI_ISL_7651301, EPI_ISL_7651303, EPI_ISL_7651315                                                                                                                                                                                                                                                                                                                                                                                                                                                                                                                                                                                                   | see above | National Platform bis UMONS/Jolimont                                                                                   | National Platform bis UMONS/Jolimont                                                                                                         | Eric Tarantino; Florian Juszcak; Gautier Detry; Guillaume Bayon-Vicente; Laetitia Gheysen; Ruddy Wattiez                                                                                                                                                                                                                                                                                                                                                                                   |
| EPI_ISL_7137310, EPI_ISL_7137311, EPI_ISL_7195620, EPI_ISL_7195621, EPI_ISL_7195622, EPI_ISL_7195623, EPI_ISL_7460338, EPI_ISL_7604552, EPI_ISL_7604594, EPI_ISL_7604595, EPI_ISL_7604613, EPI_ISL_7604615, EPI_ISL_7604627                                                                                                                                                                                                                                                                                                                                                                                                                                                                                                                                                                                                                                                                                                                                                                                                                                | see above | National Public Health Laboratory, National Centre for Infectious Diseases                                             | National Public Health Laboratory, National Centre for Infectious Diseases                                                                   | Benny Yeo Ken Yee; Constance Chen; Dennis Loy Song Qi; Dimitar Kenanov; Grace Ngan Jie Yin; Katherine Ching; Katherine Ching Zi Yan; Kwan Ki Ko; Lin Cui; Mak Tze Minn; Niranjan Nagarajan; Raymond Tzer Pin Lin; Royce Ang; Samuel Loo; Sebastian Maurer Stroh; Suphavilai Chayaporn; Zhenyang Zhou                                                                                                                                                                                       |
| EPI_ISL_7154394, EPI_ISL_7154403, EPI_ISL_7273097, EPI_ISL_7547734, EPI_ISL_7547735                                                                                                                                                                                                                                                                                                                                                                                                                                                                                                                                                                                                                                                                                                                                                                                                                                                                                                                                                                        |           | National Reference Laboratory, NCDC                                                                                    | National Reference Laboratory, Nigeria Centre for Disease Control                                                                            | Catherine Okoi; Chimaobi Chukwu; Dr Ifedayo Adetifa; Dr Ndoke Nnaemeka; Dr Omoare Adesuyi; Nwando Mba; Olajumoke Babatunde; Olusola Anuoluwapo Akanbi; Oyeronke Ayansola                                                                                                                                                                                                                                                                                                                   |
| EPI_ISL_6939819, EPI_ISL_7354124, EPI_ISL_7406048, EPI_ISL_7406049, EPI_ISL_7406082, EPI_ISL_7406083                                                                                                                                                                                                                                                                                                                                                                                                                                                                                                                                                                                                                                                                                                                                                                                                                                                                                                                                                       |           | National Virus Reference Laboratory                                                                                    | National Virus Reference Laboratory                                                                                                          | Charlene Bennett; Cillian F De Gascun; Gabriel Gonzalez; Jonathan Dean; Michael Carr; Zoe Yandle                                                                                                                                                                                                                                                                                                                                                                                           |
| EPI_ISL_7616432, EPI_ISL_7616434, EPI_ISL_7616435, EPI_ISL_7616437, EPI_ISL_7616439, EPI_ISL_7616441, EPI_ISL_7616442                                                                                                                                                                                                                                                                                                                                                                                                                                                                                                                                                                                                                                                                                                                                                                                                                                                                                                                                      | see above | Naval Health Clinic Annapolis                                                                                          | Naval Medical Research Center Biological Defense Research Directorate                                                                        | Catherine E. Arnold; Francisco Malagon; Kimberly A. Bishop-Lilly; Kyle A. Long; Logan J. Voegtly; Megan A. Schilling; Regina Z. Cer                                                                                                                                                                                                                                                                                                                                                        |
| EPI_ISL_7605624, EPI_ISL_7605625, EPI_ISL_7605626, EPI_ISL_7605627, EPI_ISL_7605628                                                                                                                                                                                                                                                                                                                                                                                                                                                                                                                                                                                                                                                                                                                                                                                                                                                                                                                                                                        |           | Ndlovu Reaserch Centre                                                                                                 | National Institute for Communicable Diseases of the National Health Laboratory Service                                                       | Amoaka DG; Bhiman JN; Everatt J; Ismail A; Mahlangu B; Mnguni A; Mohale T; Ntuli N; Scheepers C; Wolter N                                                                                                                                                                                                                                                                                                                                                                                  |
| EPI_ISL_7116413, EPI_ISL_7116439, EPI_ISL_7116461, EPI_ISL_7116681, EPI_ISL_7116718, EPI_ISL_7116738                                                                                                                                                                                                                                                                                                                                                                                                                                                                                                                                                                                                                                                                                                                                                                                                                                                                                                                                                       |           | Nebraska Public Health Laboratory                                                                                      | NPHL COVID-19 Response Team                                                                                                                  | NPHL COVID-19 Response Team                                                                                                                                                                                                                                                                                                                                                                                                                                                                |
| EPI_ISL_7544379, EPI_ISL_7544739                                                                                                                                                                                                                                                                                                                                                                                                                                                                                                                                                                                                                                                                                                                                                                                                                                                                                                                                                                                                                           |           | New Somerset Hospital wc NSH                                                                                           | NHLS/UCT                                                                                                                                     | Arash Iranzadeh; Bruna Galvao; Carolyn Williamson; Deelan Doolabh; Diana Hardie; Gert Marais; Innocent Mudau; Luicer Olubayo; Lynn Tyers; Marvin Hsiao; Nokuzola Mbhele; Rageema Joseph; Stephen Korsman                                                                                                                                                                                                                                                                                   |
| EPI_ISL_6814922, EPI_ISL_6814923, EPI_ISL_6829575, EPI_ISL_6829577, EPI_ISL_6958955, EPI_ISL_7162071, EPI_ISL_7162072, EPI_ISL_7162073, EPI_ISL_7265843, EPI_ISL_7379517, EPI_ISL_7379527, EPI_ISL_7457536, EPI_ISL_7457537, EPI_ISL_7457538, EPI_ISL_7503742, EPI_ISL_7503743, EPI_ISL_7503744, EPI_ISL_7503745, EPI_ISL_7503746, EPI_ISL_7551964, EPI_ISL_7551971, EPI_ISL_7569451, EPI_ISL_7569452, EPI_ISL_7569453, EPI_ISL_7622408, EPI_ISL_7622409, EPI_ISL_7622410, EPI_ISL_7622411, EPI_ISL_7622412                                                                                                                                                                                                                                                                                                                                                                                                                                                                                                                                                | see above | New South Wales Health Pathology Royal Prince Alfred Hospital                                                          | Microbiology RPAH                                                                                                                            | Au, J.; Bull, R.; Deveson, I.; Foster, C.; Rawlinson, W.; Ruiz Silva, M.; Van Hal, S.                                                                                                                                                                                                                                                                                                                                                                                                      |
| EPI_ISL_7418387, EPI_ISL_7431953                                                                                                                                                                                                                                                                                                                                                                                                                                                                                                                                                                                                                                                                                                                                                                                                                                                                                                                                                                                                                           |           | Niedersächsisches Landesgesundheitsamt (NLGA)                                                                          | Robert Koch Institute                                                                                                                        |                                                                                                                                                                                                                                                                                                                                                                                                                                                                                            |
| EPI_ISL_6958280, EPI_ISL_7571541, EPI_ISL_7571542                                                                                                                                                                                                                                                                                                                                                                                                                                                                                                                                                                                                                                                                                                                                                                                                                                                                                                                                                                                                          |           | North Lantau Hospital                                                                                                  | Hong Kong Department of Health                                                                                                               | Alan K.L. Tsang; Edman T.K. Lam; Ken H.L. Ng; Patricia K. L. Leung; Peter C.W. Yip; Rickjason C.W. Chan                                                                                                                                                                                                                                                                                                                                                                                    |
| EPI_ISL_7601238, EPI_ISL_7601282, EPI_ISL_7601310, EPI_ISL_7614981                                                                                                                                                                                                                                                                                                                                                                                                                                                                                                                                                                                                                                                                                                                                                                                                                                                                                                                                                                                         |           | OKMI                                                                                                                   | University Hospital Brno, CMBG                                                                                                               | Bezdicek Matej; Dolejska Monika; Kristyna Dufkova; Lengerova Martina; Svaton Jan                                                                                                                                                                                                                                                                                                                                                                                                           |
| EPI_ISL_7334887, EPI_ISL_7334888                                                                                                                                                                                                                                                                                                                                                                                                                                                                                                                                                                                                                                                                                                                                                                                                                                                                                                                                                                                                                           |           | ONEIDA COUNTY HEALTH DEPT.                                                                                             | Wadsworth Center, New York State Department of Health                                                                                        | Alexis Russell; Catharine Prussing; Daryl M. Lamson; Erasmus Schneider; Erica Lasek-Nesselquist; John Kelly; Jonathan Pitnick; Kirsten St. George; Matthew Shudt; Melissa A Leisner; Navjot Singh                                                                                                                                                                                                                                                                                          |
| EPI_ISL_7552440, EPI_ISL_7552446                                                                                                                                                                                                                                                                                                                                                                                                                                                                                                                                                                                                                                                                                                                                                                                                                                                                                                                                                                                                                           |           | Ochsner Health                                                                                                         | BiInfoExperts                                                                                                                                | Amy Feehan; Ben Lain; Chris Huston; David J. Nolan; Judy Crabtree; Julia-Garcia-Diaz; Lucio Miele; Rebecca Rose; Samuel Moot; Susanna L. Lamers; Tessa LaFleur                                                                                                                                                                                                                                                                                                                             |
| EPI_ISL_7495763, EPI_ISL_7040235                                                                                                                                                                                                                                                                                                                                                                                                                                                                                                                                                                                                                                                                                                                                                                                                                                                                                                                                                                                                                           |           | Omega Diagnostics at Mounes                                                                                            | Oslo University Hospital, Department of Medical Microbiology                                                                                 | Omega Diagnostics at Mounes<br>Atiya R Ali; Debec Nadia; Engebretsen Serina Beate; Garcia Llorente Ignacio; Hilde Elshaug; Hilde Vollan; Jon Bråte; Kamilla Heddeland Instefjord; Karoline Bragstad; Kathrine Stene-Johansen; Line Victoria Moen; Marie Paulsen Madsen; Olav Hungnes; Pedersen Benedikte Nevjen; Rasmus Riis Kopperud                                                                                                                                                      |
| EPI_ISL_7248730, EPI_ISL_7248745, EPI_ISL_7248753, EPI_ISL_7248763, EPI_ISL_7470724, EPI_ISL_7470728                                                                                                                                                                                                                                                                                                                                                                                                                                                                                                                                                                                                                                                                                                                                                                                                                                                                                                                                                       |           | Oslo University Hospital, Department of Microbiology                                                                   | Norwegian Institute of Public Health, Department of Virology                                                                                 | Arvind Yegambaram Meenakshi Sundaram; Atiya R Ali; Cathrine Fladeby; Debec Nadia; Engebretsen Serina Beate; Garcia Llorente Ignacio; Gregor D. Gillilan; Hilde Elshaug; Hilde Vollan; Jon Bråte; Kamilla Heddeland Instefjord; Karoline Bragstad; Kathrine Stene-Johansen; Line Victoria Moen; Lise Andresen; Mariann Nilsen; Marie Paulsen Madsen; Mona Holberg-Petersen; Olav Hungnes; Pedersen Benedikte Nevjen; Pål Marius Bjørnstad; Rasmus Riis Kopperud; Teodora Plamenova Ribarska |
| EPI_ISL_7470189                                                                                                                                                                                                                                                                                                                                                                                                                                                                                                                                                                                                                                                                                                                                                                                                                                                                                                                                                                                                                                            |           | Ostfold Hospital Trust - Kaines, Centre for Laboratory Medicine, Section for gene technology and infection serology    | Norwegian Institute of Public Health, Department of Virology                                                                                 | Atiya R Ali; Debec Nadia; Engebretsen Serina Beate; Garcia Llorente Ignacio; Hilde Elshaug; Hilde Vollan; Jon Bråte; Kamilla Heddeland Instefjord; Karoline Bragstad; Kathrine Stene-Johansen; Line Victoria Moen; Marie Paulsen Madsen; Olav Hungnes; Pedersen Benedikte Nevjen; Rasmus Riis Kopperud                                                                                                                                                                                     |



|                                                                                                                                                                                                                                                                                                                                                                                                                                                                                                                                                                                                                                                                                                                         |                                                                                       |                                                                                                                                                                 |                                                                                                                                                                                                                                                                                                                                                                                                                                                                                                    |
|-------------------------------------------------------------------------------------------------------------------------------------------------------------------------------------------------------------------------------------------------------------------------------------------------------------------------------------------------------------------------------------------------------------------------------------------------------------------------------------------------------------------------------------------------------------------------------------------------------------------------------------------------------------------------------------------------------------------------|---------------------------------------------------------------------------------------|-----------------------------------------------------------------------------------------------------------------------------------------------------------------|----------------------------------------------------------------------------------------------------------------------------------------------------------------------------------------------------------------------------------------------------------------------------------------------------------------------------------------------------------------------------------------------------------------------------------------------------------------------------------------------------|
| see above                                                                                                                                                                                                                                                                                                                                                                                                                                                                                                                                                                                                                                                                                                               | SAMRC                                                                                 | CERI, Centre for Epidemic Response and Innovation, Stellenbosch University and KRISP, KZN Research Innovation and Sequencing Platform, UKZN.                    | Arisha Maharaj; Glandhari J; MRC; Naidoo Y; Pillay S; Ramphal U; Ramphal Y; San JE; Tegally H; Tshibaulla D; Wilkinson E; de Oliveira T                                                                                                                                                                                                                                                                                                                                                            |
| EPI_ISL_6913953, EPI_ISL_6914908, EPI_ISL_7194610                                                                                                                                                                                                                                                                                                                                                                                                                                                                                                                                                                                                                                                                       | SARS-CoV-2 testing team, National Institute of Infectious Diseases                    | Pathogen Genomics Center, National Institute of Infectious Diseases                                                                                             | Hazuka Y Furihata; Kentaro Itokawa; Makoto Kuroda; Masanori Hashino; Masumichi Saito; Naomi Nojiri; Nozomu Hanaoka; Rina Tanaka; Tsuguto Fujimoto; Tsuyoshi Sekizuka                                                                                                                                                                                                                                                                                                                               |
| EPI_ISL_7458718, EPI_ISL_7458719, EPI_ISL_7458720, EPI_ISL_7458721, EPI_ISL_7659355                                                                                                                                                                                                                                                                                                                                                                                                                                                                                                                                                                                                                                     | SK-Roy Romanow Provincial Laboratory                                                  | Saskatchewan - Roy Romanow Provincial Laboratory (RRPL)                                                                                                         | Alanna Senecal; Amanda Lang; Jessica Minion; Kara Loos; Keith MacKenzie; Meredith Faires; Rachel DePaulo; Roy Romanow Provincial Laboratory - Molecular Diagnostics; Ryan McDonald                                                                                                                                                                                                                                                                                                                 |
| EPI_ISL_7334889, EPI_ISL_7334890                                                                                                                                                                                                                                                                                                                                                                                                                                                                                                                                                                                                                                                                                        | SUNRISE MEDICAL LABORATORIES                                                          | Wadsworth Center, New York State Department of Health                                                                                                           | Alexis Russell; Catharine Prussing; Daryl M. Lamson; Erasmus Schneider; Erica Lasek-Nesselquist; John Kelly; Jonathan Plitnick; Kirsten St. George; Matthew Shudt; Melissa A Leisner; Navjot Singh                                                                                                                                                                                                                                                                                                 |
| EPI_ISL_7195727                                                                                                                                                                                                                                                                                                                                                                                                                                                                                                                                                                                                                                                                                                         | SYNLAB                                                                                | GIGA Medical Genomics                                                                                                                                           | Bouchra Boujemla; Claire Gourzonès; Cécile Meex; Keith Durkin; Laurent Gillet; Maria Artesi; Marie-Pierre Hayette; Nadine Cambisano; Nathalie Renotte; Olivier Ek; Sébastien Bontems; Vincent Bours                                                                                                                                                                                                                                                                                                |
| EPI_ISL_7440440, EPI_ISL_7442466                                                                                                                                                                                                                                                                                                                                                                                                                                                                                                                                                                                                                                                                                        | SYNLAB MVZ Weiden                                                                     | Robert Koch Institute                                                                                                                                           |                                                                                                                                                                                                                                                                                                                                                                                                                                                                                                    |
| EPI_ISL_7565723                                                                                                                                                                                                                                                                                                                                                                                                                                                                                                                                                                                                                                                                                                         | Salud Digna                                                                           | Instituto Nacional de Medicina Genómica                                                                                                                         | Abraham Campos-Romero; Cedro-Tanda A; Cruz-Islas Jazmin; Escobar-Arrazola MA; Garnica-Lopez Dora; Herrera-Montalvo LA.; Hidalgo-Miranda A; Luna-Ruiz Marco; Mendoza-Vargas A; Moreno-Camacho José Luis; Ramirez-Vega O; Rangel-DeLeon D; Reyes-Grajeda JP; Rodriguez-Gallegos Jorge;                                                                                                                                                                                                               |
| EPI_ISL_7200823                                                                                                                                                                                                                                                                                                                                                                                                                                                                                                                                                                                                                                                                                                         | Salzkammergutklinikum Vöcklabruck, Institut für Pathologie                            | Salzkammergutklinikum Vöcklabruck, Institut für Pathologie                                                                                                      | Franz Pühringer; Penka Lechner; Regina Stitz; René Sily; Senka Rohregger                                                                                                                                                                                                                                                                                                                                                                                                                           |
| EPI_ISL_7657583, EPI_ISL_7657589                                                                                                                                                                                                                                                                                                                                                                                                                                                                                                                                                                                                                                                                                        | San Diego County Public Health Laboratory                                             | Andersen lab at Scripps Research                                                                                                                                | SEARCH Alliance San Diego                                                                                                                                                                                                                                                                                                                                                                                                                                                                          |
| EPI_ISL_7015235                                                                                                                                                                                                                                                                                                                                                                                                                                                                                                                                                                                                                                                                                                         | Selangor State Health Department                                                      | Institute for Medical Research, Infectious Disease Research Centre, National Institutes of Health, Ministry of Health Malaysia                                  | Ahmad FA; Ahmad Fazilah NA; Anasir MI; Azizan MA; Kamel K; Mohamad Sukri MZ; Mohd Zawawi Z; Norhisham SN; Ramly N; Robert F; Rosli NR; Suppiah J; Thayan R                                                                                                                                                                                                                                                                                                                                         |
| EPI_ISL_7467969                                                                                                                                                                                                                                                                                                                                                                                                                                                                                                                                                                                                                                                                                                         | Servicio Virosis Respiratorias-Departamento Virología-INEI                            | Instituto Nacional Enfermedades Infecciosas C.G.Malbran                                                                                                         | Avaro M.; Baumeister E.; Benedetti E.; Campos J.; Cisterna D.; Dattero ME; De Belder D.; Haim MS.; Lorenzo F.; Molina V.; Perandones C.; Poplepovich T.; Pontoriero A.; Russo M.; Sanchez Loria J.; Tuduri E.                                                                                                                                                                                                                                                                                      |
| EPI_ISL_7625809                                                                                                                                                                                                                                                                                                                                                                                                                                                                                                                                                                                                                                                                                                         | Servicio de Microbiología Hospital Ramon y Cajal                                      | Servicio de Microbiología Hospital Ramon y Cajal                                                                                                                | Galan JC; Martinez L. Abreu M; Ponce M; y Gonzalez-Alba JM                                                                                                                                                                                                                                                                                                                                                                                                                                         |
| EPI_ISL_6795212, EPI_ISL_6825365, EPI_ISL_7056045, EPI_ISL_7056614, EPI_ISL_7593654, EPI_ISL_7593690, EPI_ISL_7593776, EPI_ISL_7593892, EPI_ISL_7594549, EPI_ISL_7594591, EPI_ISL_7594719, EPI_ISL_7594860, EPI_ISL_7595155, EPI_ISL_7595730, EPI_ISL_7595974, EPI_ISL_7596005, EPI_ISL_7596893, EPI_ISL_7596897, EPI_ISL_7596904, EPI_ISL_7596918, EPI_ISL_7596923, EPI_ISL_7596932, EPI_ISL_7596941, EPI_ISL_7596950, EPI_ISL_7596956, EPI_ISL_7596957, EPI_ISL_7596962, EPI_ISL_7596969, EPI_ISL_7596978, EPI_ISL_7596990, EPI_ISL_7597002, EPI_ISL_7603138, EPI_ISL_7603139, EPI_ISL_7604317, EPI_ISL_7604355, EPI_ISL_7604363, EPI_ISL_7613573, EPI_ISL_7614184, EPI_ISL_7614185, EPI_ISL_7614286, EPI_ISL_7614287 |                                                                                       | Abu Hamad Ramzia; Adina Bar Chaim; Alona Frenkel; Anna Vishnevsky; Chen Weiner; Nir Rainy; Patricia Benveniste-Lekovitz; Reut Sorek Abramovich; Yevgeni Yegorov |                                                                                                                                                                                                                                                                                                                                                                                                                                                                                                    |
| see above                                                                                                                                                                                                                                                                                                                                                                                                                                                                                                                                                                                                                                                                                                               | Shamir Medical Center (Asaf Harofe)                                                   | Shamir Medical Center (Asaf Harofe)                                                                                                                             | Abu Hamad Ramzia; Adina Bar Chaim; Alona Frenkel; Anna Vishnevsky; Chen Weiner; Nir Rainy; Patricia Benveniste-Lekovitz; Reut Sorek Abramovich; Yevgeni Yegorov                                                                                                                                                                                                                                                                                                                                    |
| EPI_ISL_7062525, EPI_ISL_7405371                                                                                                                                                                                                                                                                                                                                                                                                                                                                                                                                                                                                                                                                                        | Spital Riggsberg                                                                      | Institute for Infectious Diseases, University of Bern                                                                                                           | Alban Ramette; Christian Baumann; Cora Sägesser; Franziska Suter-Riniker; Loic Borcard; Miguel A Terrazos Miani; Nicole Liechti; Pascal Bittel; Peter Keller; Sonja Gempeler; Stefan Neuenschwander; Stephen L Leib                                                                                                                                                                                                                                                                                |
| EPI_ISL_6963509                                                                                                                                                                                                                                                                                                                                                                                                                                                                                                                                                                                                                                                                                                         | Sri Jayadeva Institute of Cardiovascular Sciences and Research / Strand Life Sciences | National Centre for Biological Sciences, TIFR - Rockefeller Foundation                                                                                          | Aarati Karaba; Anson Kunjumon George; Aparnaa Ramanathan; Apurva Sarin; Chandrasekhar Vadlamudi; Chitra Pattabiraman; Darshan Sreenivas; Dasaradhi Palakodeti; Dimple Notani; Divya Priya A; Madhusudhan J; Manisha Bharadwaj; Manoj Kumar Jha; Mudasir Nazaar; Pradeep B P; Priyanka Ananta Mulay; Ramesh Hariharan; Rohan Pais; Satyajit Mayor; Saumitra Mardikar; Srivathsan Adimoolam; Uma Ramakrishnan; Vamsi Veeramachaneni; Vasanthapuram Ravi; Vijay Chandru; Vishal G Rao; Vasodha Kannan |
| EPI_ISL_7265233                                                                                                                                                                                                                                                                                                                                                                                                                                                                                                                                                                                                                                                                                                         | St Vincent's Pathology (SydPath)                                                      | NSW Health Pathology - Institute of Clinical Pathology and Medical Research; Westmead Hospital; University of Sydney                                            | Arnott A.; Draper J.; Gall M.; Martinez E.; Rockett R.; Sintchenko V.; on behalf of ICPMR                                                                                                                                                                                                                                                                                                                                                                                                          |
| EPI_ISL_7170972                                                                                                                                                                                                                                                                                                                                                                                                                                                                                                                                                                                                                                                                                                         | Stadspital Triemli                                                                    | Institute of Medical Virology                                                                                                                                   | Alexandra Trkola; Annette Audigé; Cyril Shah; Gabriela Ziltener; Guido Bloemberg; Jon Huder; Jürg Böni; Kevin Steiner; Maria Grünberg; Maryam Zaheri; Michael Huber; Riccarda Capaul; Stefan Schmutz; Verena Kufner                                                                                                                                                                                                                                                                                |
| EPI_ISL_6971472, EPI_ISL_7606033, EPI_ISL_7632035, EPI_ISL_7632045                                                                                                                                                                                                                                                                                                                                                                                                                                                                                                                                                                                                                                                      | Stadspital Triemli                                                                    | Institute of Medical Virology, University of Zurich                                                                                                             | Alexandra Trkola; Annette Audigé; Catharine Aquino; Cyril Shah; Daniel Ehrsam; Gabriela Ziltener; Guido Bloemberg; Hubert Rehrauer; Isabel Stürmer; Joel Wirz; Jon Huder; Jürg Böni; Kevin Steiner; Maria Grünberg; Maryam Zaheri; Michael Huber; Riccarda Capaul; Stefan Schmutz; Verena Kufner; Weihong Qi                                                                                                                                                                                       |
| EPI_ISL_7650507                                                                                                                                                                                                                                                                                                                                                                                                                                                                                                                                                                                                                                                                                                         | StarMed Healthcare                                                                    | UNC Charlotte Environmental Monitoring Laboratory                                                                                                               | Cynthia Gibas; Jannatul Ferdous; Jessica Schlueter; Juan Bolanos; Kevin Lambirth; Samuel Kunkleman; Torri Weathers                                                                                                                                                                                                                                                                                                                                                                                 |
| EPI_ISL_7445855                                                                                                                                                                                                                                                                                                                                                                                                                                                                                                                                                                                                                                                                                                         | State Hygienic Laboratory at the University of Iowa                                   | State Hygienic Laboratory at the University of Iowa                                                                                                             | Alankar Kampoowale; Anna Yakos; Cindy Toll; Davis Rieckenberg; Erik Twait; Jeff Benfer; Kris Eveland; Krishnaveni Sompallae; Kristen Zanon; Mariah Knutson; Mohammed Allam; Valerie Reeb; Wes Hottel                                                                                                                                                                                                                                                                                               |
| EPI_ISL_7013425, EPI_ISL_7264087, EPI_ISL_7264088, EPI_ISL_7456351, EPI_ISL_7456393, EPI_ISL_7456394, EPI_ISL_7456395, EPI_ISL_7456396, EPI_ISL_7456397, EPI_ISL_7456398, EPI_ISL_7456399, EPI_ISL_7456400, EPI_ISL_7620798, EPI_ISL_7620819                                                                                                                                                                                                                                                                                                                                                                                                                                                                            |                                                                                       |                                                                                                                                                                 | Ayana Garnet; Daniel Strange; Edward Desmond; Pamela O'Brien; Razvan Sultana                                                                                                                                                                                                                                                                                                                                                                                                                       |
| see above                                                                                                                                                                                                                                                                                                                                                                                                                                                                                                                                                                                                                                                                                                               | State Laboratories Division, Hawaii State Department of Health                        | State Laboratories Division, Hawaii State Department of Health                                                                                                  | Ayana Garnet; Daniel Strange; Edward Desmond; Pamela O'Brien; Razvan Sultana                                                                                                                                                                                                                                                                                                                                                                                                                       |
| EPI_ISL_7544013, EPI_ISL_7544494, EPI_ISL_7544584, EPI_ISL_7544730                                                                                                                                                                                                                                                                                                                                                                                                                                                                                                                                                                                                                                                      | Study: Rapid Diag POC Covid                                                           | NHLS/UCT                                                                                                                                                        | Arash Iranzadeh; Bruna Galvao; Carolyn Williamson; Deelan Doolabh; Diana Hardie; Gert Marais; Innocent Mudau; Luicer Olubayo; Lynn Tyers; Marvin Hsiao; Nokuzola Mbhele; Rageema Joseph; Stephen Korsman                                                                                                                                                                                                                                                                                           |
| EPI_ISL_7364700, EPI_ISL_7364701, EPI_ISL_7364702                                                                                                                                                                                                                                                                                                                                                                                                                                                                                                                                                                                                                                                                       | Summit Clinical Laboratories                                                          | City of Milwaukee Health Department Laboratory                                                                                                                  | Amy Bauer; Manjeet Khubbar; Samantha Scott; Sanjib Bhattacharyya                                                                                                                                                                                                                                                                                                                                                                                                                                   |
| EPI_ISL_6883250, EPI_ISL_7452246, EPI_ISL_7452247                                                                                                                                                                                                                                                                                                                                                                                                                                                                                                                                                                                                                                                                       | Swedish national genomic surveillance program of SARS-CoV-2                           | The Public Health Agency of Sweden                                                                                                                              | Alma Brolund; Maria Lind Karlberg; Maximilian Riess; Swedish national genomic surveillance program of SARS-CoV-2                                                                                                                                                                                                                                                                                                                                                                                   |
| EPI_ISL_7457427, EPI_ISL_7457428, EPI_ISL_7457429, EPI_ISL_7457430, EPI_ISL_7457431                                                                                                                                                                                                                                                                                                                                                                                                                                                                                                                                                                                                                                     | Synlab Medlab                                                                         | Karolinska University Hospital Huddinge                                                                                                                         | Annika Tiveljung Lindell; Henning Onsbring; Jan Albert; Karina Hentrich; Lynda Eneh; Martin Ekman; Natalija Gerasimcik; Robert Drydak; Sandra Brodesson; Shambhu Ganesappa Aralaguppe; Tanja Normark; Tobias Allander; Valtteri Wirta; Zhibing Yun                                                                                                                                                                                                                                                 |
| EPI_ISL_7605688                                                                                                                                                                                                                                                                                                                                                                                                                                                                                                                                                                                                                                                                                                         | TINTSWALO LABORATORY                                                                  | National Institute for Communicable Diseases of the National Health Laboratory Service                                                                          | Amoako DG; Bhiman JN; Everatt J; Ismail A; Mahlangu B; Mnguni A; Mohale T; Ntuli N; Scheepers C; Wolter N                                                                                                                                                                                                                                                                                                                                                                                          |
| EPI_ISL_7605602, EPI_ISL_7605603, EPI_ISL_7605604, EPI_ISL_7605605, EPI_ISL_7605606, EPI_ISL_7605608, EPI_ISL_7605609, EPI_ISL_7605613, EPI_ISL_7605614, EPI_ISL_7605615, EPI_ISL_7605616, EPI_ISL_7605620, EPI_ISL_7605621, EPI_ISL_7605623, EPI_ISL_7605665, EPI_ISL_7605684, EPI_ISL_7605746, EPI_ISL_7605747, EPI_ISL_7605766                                                                                                                                                                                                                                                                                                                                                                                       |                                                                                       |                                                                                                                                                                 | Amoako DG; Bhiman JN; Everatt J; Ismail A; Mahlangu B; Mnguni A; Mohale T; Ntuli N; Scheepers C; Wolter N                                                                                                                                                                                                                                                                                                                                                                                          |
| see above                                                                                                                                                                                                                                                                                                                                                                                                                                                                                                                                                                                                                                                                                                               | TSHEPONG LABORATORY                                                                   | National Institute for Communicable Diseases of the National Health Laboratory Service                                                                          | Amoako DG; Bhiman JN; Everatt J; Ismail A; Mahlangu B; Mnguni A; Mohale T; Ntuli N; Scheepers C; Wolter N                                                                                                                                                                                                                                                                                                                                                                                          |
| EPI_ISL_7605805                                                                                                                                                                                                                                                                                                                                                                                                                                                                                                                                                                                                                                                                                                         | TXDSHS                                                                                | TXDSHS                                                                                                                                                          | Anita Pokharel; Bonnie Oh; Chun Wang; Grace Kubin; Karen Bobier; Maliha Rahman; Mayela Pedrueza; Rachel Lee; Rashmi Tuladhar                                                                                                                                                                                                                                                                                                                                                                       |
| EPI_ISL_7456440                                                                                                                                                                                                                                                                                                                                                                                                                                                                                                                                                                                                                                                                                                         | Tambo Memorial Laboratory                                                             | National Institute for Communicable Diseases of the National Health Laboratory Service                                                                          | Amoako DG; Bhiman JN; Everatt J; Ismail A; Mahlangu B; Mnguni A; Mohale T; Ntuli N; Scheepers C; Wolter N                                                                                                                                                                                                                                                                                                                                                                                          |
| EPI_ISL_7571540                                                                                                                                                                                                                                                                                                                                                                                                                                                                                                                                                                                                                                                                                                         | Temporary Specimen Collection Centre at the AsiaWorld-Expo                            | Hong Kong Department of Health                                                                                                                                  | Alan K.L. Tsang; Edman T.K. Lam; Ken H.L. Ng; Patricia K. L. Leung; Peter C.W. Yip; Rickjason C.W. Chan                                                                                                                                                                                                                                                                                                                                                                                            |
| EPI_ISL_6825551                                                                                                                                                                                                                                                                                                                                                                                                                                                                                                                                                                                                                                                                                                         | Territory Pathology                                                                   | Territory Pathology                                                                                                                                             | Dimitrios Menouhos; Ella Meumann; Robert Baird                                                                                                                                                                                                                                                                                                                                                                                                                                                     |
| EPI_ISL_7171744                                                                                                                                                                                                                                                                                                                                                                                                                                                                                                                                                                                                                                                                                                         | The Hope Clinic of Emory Vaccine Center, Emory University                             | Piantadosi Lab, Emory Department of Pathology                                                                                                                   | Anne Piantadosi; Azmain Taz; Dara Khosravi; Ethan Wang; Jesse Waggoner; Ludy Carmola; Marybeth Sexton; Nadine Roupheal                                                                                                                                                                                                                                                                                                                                                                             |
| EPI_ISL_7446810                                                                                                                                                                                                                                                                                                                                                                                                                                                                                                                                                                                                                                                                                                         | Thüringer Landesamtes für Verbraucherschutz                                           | Robert Koch Institute                                                                                                                                           |                                                                                                                                                                                                                                                                                                                                                                                                                                                                                                    |
| EPI_ISL_7647061                                                                                                                                                                                                                                                                                                                                                                                                                                                                                                                                                                                                                                                                                                         | Trinidad Public Health Laboratory                                                     | Carrington Lab, Department of Preclinical Sciences, Faculty of Medical Sciences, The University of the West Indies, St Augustine Campus                         | Anushka Ramjag; Arianne Brown-Jordan; Avery Hinds; Christine V. F. Carrington; Christopher Oura; Gabriel Escobar; Nikita S. D. Sahadeo; Nuno Faria; Oliver Pybus; Risha Singh; Roshan Parasram; Sarah Hill; Soren Nicholls; SueMin Nathaniel; Vernie Ramkissoon                                                                                                                                                                                                                                    |
| EPI_ISL_7235629, EPI_ISL_7660974, EPI_ISL_7660975, EPI_ISL_7660976, EPI_ISL_7660977, EPI_ISL_7660978, EPI_ISL_7660979, EPI_ISL_7660980, EPI_ISL_7660981, EPI_ISL_7660982, EPI_ISL_7660983, EPI_ISL_7660984, EPI_ISL_7660985, EPI_ISL_7660986, EPI_ISL_7660987, EPI_ISL_7660989, EPI_ISL_7660991, EPI_ISL_7660993, EPI_ISL_7660994, EPI_ISL_7660995, EPI_ISL_7660996                                                                                                                                                                                                                                                                                                                                                     |                                                                                       |                                                                                                                                                                 |                                                                                                                                                                                                                                                                                                                                                                                                                                                                                                    |

|                                                                                                                                                                                                                                                                                                                                                                                                                                                                                                                                                                                                                                                                                                                         |                                                                                                                         |                                                                                                                                              |                                                                                                                                                                                                                                                                                                                                                                                                                                                                                                                                                                                                                                                                                                                                         |
|-------------------------------------------------------------------------------------------------------------------------------------------------------------------------------------------------------------------------------------------------------------------------------------------------------------------------------------------------------------------------------------------------------------------------------------------------------------------------------------------------------------------------------------------------------------------------------------------------------------------------------------------------------------------------------------------------------------------------|-------------------------------------------------------------------------------------------------------------------------|----------------------------------------------------------------------------------------------------------------------------------------------|-----------------------------------------------------------------------------------------------------------------------------------------------------------------------------------------------------------------------------------------------------------------------------------------------------------------------------------------------------------------------------------------------------------------------------------------------------------------------------------------------------------------------------------------------------------------------------------------------------------------------------------------------------------------------------------------------------------------------------------------|
| see above                                                                                                                                                                                                                                                                                                                                                                                                                                                                                                                                                                                                                                                                                                               | Tulane University School of Medicine                                                                                    | Tulane University School of Medicine                                                                                                         | Di Tian                                                                                                                                                                                                                                                                                                                                                                                                                                                                                                                                                                                                                                                                                                                                 |
| EPI_ISL_7505962                                                                                                                                                                                                                                                                                                                                                                                                                                                                                                                                                                                                                                                                                                         | UC Davis Genome Center                                                                                                  | UC Davis Genome Center                                                                                                                       | Healthy Davis Together; UC Davis                                                                                                                                                                                                                                                                                                                                                                                                                                                                                                                                                                                                                                                                                                        |
| EPI_ISL_7649984, EPI_ISL_7649985, EPI_ISL_7649986, EPI_ISL_7649987, EPI_ISL_7649988, EPI_ISL_7649989, EPI_ISL_7649990, EPI_ISL_7649991, EPI_ISL_7649992, EPI_ISL_7649993, EPI_ISL_7649994, EPI_ISL_7649995, EPI_ISL_7649996, EPI_ISL_7649997, EPI_ISL_7649998, EPI_ISL_7649999, EPI_ISL_7650000                                                                                                                                                                                                                                                                                                                                                                                                                         |                                                                                                                         |                                                                                                                                              |                                                                                                                                                                                                                                                                                                                                                                                                                                                                                                                                                                                                                                                                                                                                         |
| see above                                                                                                                                                                                                                                                                                                                                                                                                                                                                                                                                                                                                                                                                                                               | UNAM Molecular Diagnostic Laboratory                                                                                    | Forschungszentrum Borstel                                                                                                                    | Azaria Diergaardt; Christian Utpatel; Emmanuel Nepolo; Ivan Barilar; Jasmin Scharnberg; Loide Shipingana; Lusía Mhuulu; Stefan Niemann; Tanja Niemann; Vanessa Mohr                                                                                                                                                                                                                                                                                                                                                                                                                                                                                                                                                                     |
| EPI_ISL_7451261                                                                                                                                                                                                                                                                                                                                                                                                                                                                                                                                                                                                                                                                                                         | UNILABS                                                                                                                 | Instituto Nacional de Saude (INSA)                                                                                                           | Borges et al                                                                                                                                                                                                                                                                                                                                                                                                                                                                                                                                                                                                                                                                                                                            |
| EPI_ISL_7160037, EPI_ISL_7160038, EPI_ISL_7160039, EPI_ISL_7545421, EPI_ISL_7545422, EPI_ISL_7545423, EPI_ISL_7545424                                                                                                                                                                                                                                                                                                                                                                                                                                                                                                                                                                                                   |                                                                                                                         |                                                                                                                                              |                                                                                                                                                                                                                                                                                                                                                                                                                                                                                                                                                                                                                                                                                                                                         |
| see above                                                                                                                                                                                                                                                                                                                                                                                                                                                                                                                                                                                                                                                                                                               | UW Virology Lab                                                                                                         | UW Virology Lab                                                                                                                              | Alexander Greninger; Hong Xie; Isabel Arnould; Keith R Jerome; Meei-Li Huang; Nathan Breit; Patrick Mathias; Pavitra Roychoudhury; Pooneh Hajian; Ricardo Perez; Robert J. Livingston; Saraswathi Sathees; Sean Ellis; Seffir T. Wendm; Shah Mohamed Bakhsh; Tien V. Nguyen                                                                                                                                                                                                                                                                                                                                                                                                                                                             |
| EPI_ISL_7544861, EPI_ISL_7631788                                                                                                                                                                                                                                                                                                                                                                                                                                                                                                                                                                                                                                                                                        | Unilabs                                                                                                                 | Institute of Medical Virology, University of Zurich                                                                                          | Alexandra Trkola; Annette Audigé; Catharine Aquino; Cyril Shah; Daniel Ehrsam; Gabriela Ziltener; Guido Bloemberg; Hubert Rehrauer; Isabel Stürmer; Joel Wirz; Jon Huder; Jörg Böni; Kevin Steiner; Maria Grünberg; Maryam Zaheri; Michael Huber; Riccarda Capaul; Stefan Schmutz; Verena Kufner; Weihong Qi                                                                                                                                                                                                                                                                                                                                                                                                                            |
| EPI_ISL_7470330, EPI_ISL_7470341                                                                                                                                                                                                                                                                                                                                                                                                                                                                                                                                                                                                                                                                                        | Unilabs Laboratory Medicine                                                                                             | Norwegian Institute of Public Health, Department of Virology                                                                                 | Atiya R Ali; Debec Nadia; Engebretsen Serina Beate; Garcia Llorente Ignacio; Hilde Elshaug; Hilde Vollan; Jon Bråte; Kamilla Heddeland Instefjord; Karoline Bragstad; Kathrine Stene-Johansen; Line Victoria Moen; Marie Paulsen Madsen; Olav Hungnes; Pedersen Benedikte Nevjen; Rasmus Riis Kopperud                                                                                                                                                                                                                                                                                                                                                                                                                                  |
| EPI_ISL_7141056                                                                                                                                                                                                                                                                                                                                                                                                                                                                                                                                                                                                                                                                                                         | Unipath Speciality Laboratory Limited, Ahmedabad                                                                        | Gujarat Biotechnology Research Centre                                                                                                        | Apurvasinh Puvav; Bhadreshsinh Gohil; Chaitanya Joshi; Dinesh Kumar; Janvi Raval; Jwalant Shah; Madhvi Joshi; Nimesh Patel; Nitin Savaliya; Nitin Shukla; Priyank Chavda; Ramesh Pandit; Sonal Sharma; Zarna Patel                                                                                                                                                                                                                                                                                                                                                                                                                                                                                                                      |
| EPI_ISL_7613414                                                                                                                                                                                                                                                                                                                                                                                                                                                                                                                                                                                                                                                                                                         | University Hospital, San Antonio                                                                                        | STRL UT Health San Antonio, Greehey Children's Cancer Research Institute                                                                     | Bethany Landry; Dawn Garcia; Guillermo Nunez; Hongxin Fan; Josefina Stoever; Korri Weldon; Kumari Vadlamudi; Marjorie Parker David; San Antonio Metropolitan Health District; Texas Department of State Health Services; Weijing He; Yidong Chen; Zhao Lai; Zhenqing Ye                                                                                                                                                                                                                                                                                                                                                                                                                                                                 |
| EPI_ISL_7605542, EPI_ISL_7605543, EPI_ISL_7605546, EPI_ISL_7605547                                                                                                                                                                                                                                                                                                                                                                                                                                                                                                                                                                                                                                                      | University Hospitals of Geneva, Laboratory of Virology                                                                  | HUG, Laboratory of Virology and the Health2030 Genome Center                                                                                 | Aline Mamin; Ana Rita Goncalves; Cedric Howald; Deborah Penet; Francisco Perez; Henri Pegeot; Ioannis Xenarios; Keith Harshman; Laurent Kaiser; Lorenzo Cerutti; Melyssa Elies; Samuel Cordey                                                                                                                                                                                                                                                                                                                                                                                                                                                                                                                                           |
| EPI_ISL_7542255                                                                                                                                                                                                                                                                                                                                                                                                                                                                                                                                                                                                                                                                                                         | University Medical Center Hamburg Eppendorf                                                                             | Heinrich Pette Institute, Leibniz Institute for Experimental Virology                                                                        | Adam Grundhoff; Alexis Robitaille; Johannes Knobloch; Martin Aepfelbacher; Nicole Fischer; Thomas Günther                                                                                                                                                                                                                                                                                                                                                                                                                                                                                                                                                                                                                               |
| EPI_ISL_6929785, EPI_ISL_7195724, EPI_ISL_7195725, EPI_ISL_7195726, EPI_ISL_7405404, EPI_ISL_7405405, EPI_ISL_7405406, EPI_ISL_7405407, EPI_ISL_7405408, EPI_ISL_7405409, EPI_ISL_7405412, EPI_ISL_7462253, EPI_ISL_7462258, EPI_ISL_7462265, EPI_ISL_7462271, EPI_ISL_7601672                                                                                                                                                                                                                                                                                                                                                                                                                                          |                                                                                                                         |                                                                                                                                              |                                                                                                                                                                                                                                                                                                                                                                                                                                                                                                                                                                                                                                                                                                                                         |
| see above                                                                                                                                                                                                                                                                                                                                                                                                                                                                                                                                                                                                                                                                                                               | University of Liège COVID-19 testing center                                                                             | GIGA Medical Genomics                                                                                                                        | Bouchra Boujemla; Claire Gourzonès; Cécile Meex; Keith Durkin; Laurent Gillet; Maria Artes; Marie-Pierre Hayette; Nadine Cambisano; Nathalie Renotte; Olivier Ek; Sébastien Bontems; Vincent Bours                                                                                                                                                                                                                                                                                                                                                                                                                                                                                                                                      |
| EPI_ISL_7651793                                                                                                                                                                                                                                                                                                                                                                                                                                                                                                                                                                                                                                                                                                         | University of New Mexico Hospital                                                                                       | Center for Global Health, University of New Mexico Health Sciences Center                                                                    | Darrell Dinwiddie; Daryl Domman; Jesse Young; Jon Fleming; Kurt Schwalm; Valery Morley                                                                                                                                                                                                                                                                                                                                                                                                                                                                                                                                                                                                                                                  |
| EPI_ISL_7379462                                                                                                                                                                                                                                                                                                                                                                                                                                                                                                                                                                                                                                                                                                         | University of Wisconsin-Madison AIDS Vaccine Research Laboratories                                                      | University of Wisconsin-Madison AIDS Vaccine Research Laboratories                                                                           | Gage Moreno; Katarina Braun; et al. AIDS Vaccine Research Laboratories                                                                                                                                                                                                                                                                                                                                                                                                                                                                                                                                                                                                                                                                  |
| EPI_ISL_7605921, EPI_ISL_7605979, EPI_ISL_7606032                                                                                                                                                                                                                                                                                                                                                                                                                                                                                                                                                                                                                                                                       | Universität Zürich                                                                                                      | Institute of Medical Virology, University of Zurich                                                                                          | Alexandra Trkola; Annette Audigé; Catharine Aquino; Cyril Shah; Daniel Ehrsam; Gabriela Ziltener; Guido Bloemberg; Hubert Rehrauer; Isabel Stürmer; Joel Wirz; Jon Huder; Jörg Böni; Kevin Steiner; Maria Grünberg; Maryam Zaheri; Michael Huber; Riccarda Capaul; Stefan Schmutz; Verena Kufner; Weihong Qi                                                                                                                                                                                                                                                                                                                                                                                                                            |
| EPI_ISL_7544862, EPI_ISL_7544872, EPI_ISL_7631828                                                                                                                                                                                                                                                                                                                                                                                                                                                                                                                                                                                                                                                                       | UniversitätsSpital Zürich                                                                                               | Institute of Medical Virology, University of Zurich                                                                                          | Alexandra Trkola; Annette Audigé; Catharine Aquino; Cyril Shah; Daniel Ehrsam; Gabriela Ziltener; Guido Bloemberg; Hubert Rehrauer; Isabel Stürmer; Joel Wirz; Jon Huder; Jörg Böni; Kevin Steiner; Maria Grünberg; Maryam Zaheri; Michael Huber; Riccarda Capaul; Stefan Schmutz; Verena Kufner; Weihong Qi                                                                                                                                                                                                                                                                                                                                                                                                                            |
| EPI_ISL_7418452, EPI_ISL_7418453, EPI_ISL_7418454, EPI_ISL_7418455, EPI_ISL_7418456, EPI_ISL_7418463, EPI_ISL_7418464, EPI_ISL_7418465                                                                                                                                                                                                                                                                                                                                                                                                                                                                                                                                                                                  |                                                                                                                         |                                                                                                                                              |                                                                                                                                                                                                                                                                                                                                                                                                                                                                                                                                                                                                                                                                                                                                         |
| see above                                                                                                                                                                                                                                                                                                                                                                                                                                                                                                                                                                                                                                                                                                               | Universitätsklinikum Frankfurt - Institut für Medizinische Virologie                                                    | Robert Koch Institute                                                                                                                        |                                                                                                                                                                                                                                                                                                                                                                                                                                                                                                                                                                                                                                                                                                                                         |
| EPI_ISL_7336152, EPI_ISL_7261603                                                                                                                                                                                                                                                                                                                                                                                                                                                                                                                                                                                                                                                                                        | Utah Public Health Laboratory VA Tampa Healthcare System                                                                | Utah Public Health Laboratory VHA Public Health Reference Laboratory                                                                         | Erin L. Young; John Arnn; Kelly F. Oakeson; Olinto Linares-Perdomo; Pooja Gupta; Tom Iverson<br>Mark Holodniy on behalf of VA SEQFORCE; US Department of Veterans Affairs                                                                                                                                                                                                                                                                                                                                                                                                                                                                                                                                                               |
| EPI_ISL_6989662                                                                                                                                                                                                                                                                                                                                                                                                                                                                                                                                                                                                                                                                                                         | Vault Health                                                                                                            | Minnesota Department of Health, Public Health Laboratory                                                                                     | Alyssa Mondelli; Elizabeth Horn; Jacob Garfin; Kelly Pung; Matt Plumb; Sarah Namugenyi; and Xiong Wang                                                                                                                                                                                                                                                                                                                                                                                                                                                                                                                                                                                                                                  |
| EPI_ISL_7398681, EPI_ISL_7398758                                                                                                                                                                                                                                                                                                                                                                                                                                                                                                                                                                                                                                                                                        | Vichaivej International Hospital Nongkhaem                                                                              | National Institute of Health, Department of Medical Sciences, Ministry of Public Health, Thailand                                            | Archawan Rojanawiwat; Ballang Uppapong; Beth Skaggs; Donlaya Maunplueg; Kazuhisa Okada; Natchaya Khiahsang; Nuttida Thongpramul; Pakorn Pirompong; Pilailuk Akkapaiboon Okada; Piroon Jenjaroenpun; Pongpun Sawatwong; Prapat Suriyaphol; Sirikanda Wimol; Siripaporn Phuygun; Sitiporn Parmmen; Supakit Sirilak; Suratchana Mitrat; Thanutsapa Thanadachakul; Thidathip Wongsurawat                                                                                                                                                                                                                                                                                                                                                    |
| EPI_ISL_7224567, EPI_ISL_7224577                                                                                                                                                                                                                                                                                                                                                                                                                                                                                                                                                                                                                                                                                        | Viollier AG                                                                                                             | Clinical Bacteriology, University Hospital Basel                                                                                             | Adrian Egli; Alfredo Mari; Christiane Beckmann; Fanny Wegner; Hans Hirsch; Helena MB Seth-Smith; Julia Bielicki; Karoline Leuzinger; Manuel Battegay; Tim Roloff                                                                                                                                                                                                                                                                                                                                                                                                                                                                                                                                                                        |
| EPI_ISL_7371749, EPI_ISL_7371751, EPI_ISL_7372207, EPI_ISL_7566519, EPI_ISL_7566755, EPI_ISL_7566802, EPI_ISL_7566826, EPI_ISL_7566875, EPI_ISL_7566947, EPI_ISL_7620490, EPI_ISL_7620551, EPI_ISL_7652802, EPI_ISL_7652817, EPI_ISL_7652873, EPI_ISL_7652883, EPI_ISL_7652959, EPI_ISL_7652962, EPI_ISL_7652983, EPI_ISL_7653300, EPI_ISL_7653449, EPI_ISL_7653461                                                                                                                                                                                                                                                                                                                                                     |                                                                                                                         |                                                                                                                                              |                                                                                                                                                                                                                                                                                                                                                                                                                                                                                                                                                                                                                                                                                                                                         |
| see above                                                                                                                                                                                                                                                                                                                                                                                                                                                                                                                                                                                                                                                                                                               | Viollier AG                                                                                                             | Department of Biosystems Science and Engineering, ETH Zürich                                                                                 | Andrea Patrignani; Andrea Patrizia Salzmann; Andrea Cabral de Gouveia; Catharine Aquino; Catharine Fournier; Chaoran Chen; Christian Beisel; Christian Urban; Christiane Beckmann; Christoph Noppen; Daniel Ehrsam; David Drefuss; Doris Popovic; Elodie Burcklen; Franziska Singer; Griffin White; Hai Bui; Henriette Kurth; Ina Nissen; Isabel Stürmer; Ivan Topolsky; Jay Tracy; Kim Philipp Jablonski; Lara Fuhrmann; Laura Neff; Lennart Opitz; Louis du Plessis; Maria Domenica Moccia; Matteo Carrara; Maurice Redondo; Mirjam Feldkamp; Natascha Santacroce; Niko Beerenwinkel; Olivier Kelce; Pelin Icer; Ralph Schlappbach; Rebecca Denes; Sarah Nadeau; Shuqing Yu; Simon Grüter; Tanja Stadler; Timothy Sykes; Tobias Schär |
| EPI_ISL_7509012, EPI_ISL_7509019, EPI_ISL_7509025, EPI_ISL_7509030, EPI_ISL_7561327, EPI_ISL_7561395, EPI_ISL_7561411, EPI_ISL_7561414, EPI_ISL_7561423, EPI_ISL_7561425, EPI_ISL_7561434, EPI_ISL_7561441, EPI_ISL_7561446, EPI_ISL_7561454, EPI_ISL_7561464, EPI_ISL_7561472, EPI_ISL_7561477, EPI_ISL_7561482                                                                                                                                                                                                                                                                                                                                                                                                        |                                                                                                                         |                                                                                                                                              |                                                                                                                                                                                                                                                                                                                                                                                                                                                                                                                                                                                                                                                                                                                                         |
| see above                                                                                                                                                                                                                                                                                                                                                                                                                                                                                                                                                                                                                                                                                                               | Virology Department, Royal Infirmary of Edinburgh, NHS Lothian / School of Biological Sciences, University of Edinburgh | COVID-19 Genomics UK (COG-UK) Consortium                                                                                                     | Colquhoun R; Cotton S; Dewar R; Fernandez G; Gallagher A; Hill V; Jackson B; Maloney D; McCrone JT; McHugh M; O'Toole A; Rambaut A; Scher E; Templeton K; Yu X                                                                                                                                                                                                                                                                                                                                                                                                                                                                                                                                                                          |
| EPI_ISL_7285844, EPI_ISL_7285845, EPI_ISL_7285846, EPI_ISL_7285847, EPI_ISL_7285848                                                                                                                                                                                                                                                                                                                                                                                                                                                                                                                                                                                                                                     | Virology Laboratory, Scientific Department, Army Medical Center                                                         | Virology Laboratory, Scientific Department, Army Medical Center                                                                              | Anella Monte; Anna Anselmo; Antonella Fortunato; Filippo Molinari; Florigio Lista; Francesco Giordani; Giancarlo Petralito; Giandomenico Cerreto; Giulia Campoli; Lucia Nicosia; Marzia Cavalli; Pietro Marco D'Angelo; Riccardo De Sanctis; Rossella Brandi; Silvia Fillo; Vanessa Vera Fain                                                                                                                                                                                                                                                                                                                                                                                                                                           |
| EPI_ISL_7503508, EPI_ISL_7503509                                                                                                                                                                                                                                                                                                                                                                                                                                                                                                                                                                                                                                                                                        | Washington State Department of Health Public Health Laboratories                                                        | Washington State Department of Health Public Health Laboratories                                                                             | Alex Latham; Ardizon Valdez; Avi Singh; Claire Howell; Denny Russell; Drew MacKellar; Holly Halstead; JohnAric Peterson; Kathryn Suckles; Kristin Roche; Lisa Jones; Philip Dykema; Rebecca Cao                                                                                                                                                                                                                                                                                                                                                                                                                                                                                                                                         |
| EPI_ISL_7548944, EPI_ISL_7548945                                                                                                                                                                                                                                                                                                                                                                                                                                                                                                                                                                                                                                                                                        | Wexner Medical Center                                                                                                   | OSU College of Medicine                                                                                                                      | Corcoran, S.; Ko enig, S.                                                                                                                                                                                                                                                                                                                                                                                                                                                                                                                                                                                                                                                                                                               |
| EPI_ISL_7662792, EPI_ISL_7662814, EPI_ISL_7662820                                                                                                                                                                                                                                                                                                                                                                                                                                                                                                                                                                                                                                                                       | Willis-Knighton Medical Center Hospital Laboratory                                                                      | LSUHS Emerging Viral Threat Laboratory                                                                                                       | Adrian Almodovar; Alexander Mijalis; Andrew D. Yurochko; April N. Johnson; Christopher G. Kevill; Gregory L. Ware; Jennifer L. Carroll; Jeremy P. Kamil; John A. Vanchiere; Joseph A. Bocchini; Krista Queen; Lorie M. Atkins; Maarten Van Diest; Rona S. Scott                                                                                                                                                                                                                                                                                                                                                                                                                                                                         |
| EPI_ISL_7501188                                                                                                                                                                                                                                                                                                                                                                                                                                                                                                                                                                                                                                                                                                         | Winchester Hospital via Lahey Hospital                                                                                  | New England Biolabs                                                                                                                          | Abel, G.; B.W.; C.J.; Colgrove, R.; Duncan, R.; Elfahal, M.; Flynn; Heim, K.; Karolides, M.; L. and Langhorst; Michaels, L.; Pinet, K.; Skelton, T.; Sun                                                                                                                                                                                                                                                                                                                                                                                                                                                                                                                                                                                |
| EPI_ISL_7263803                                                                                                                                                                                                                                                                                                                                                                                                                                                                                                                                                                                                                                                                                                         | Wisconsin State Laboratory of Hygiene Communicable Disease Division                                                     | Wisconsin State Laboratory of Hygiene Communicable Disease Division                                                                          | Abigail C. Shockey; Alicia J. Mooney; Erika M. Hanson; Kelsey R. Florek; Richard Griesser; Sara Wagner; Tonya Danz                                                                                                                                                                                                                                                                                                                                                                                                                                                                                                                                                                                                                      |
| EPI_ISL_7478524, EPI_ISL_7478525, EPI_ISL_7478526, EPI_ISL_7478527, EPI_ISL_7478529, EPI_ISL_7478530, EPI_ISL_7502154, EPI_ISL_7502155                                                                                                                                                                                                                                                                                                                                                                                                                                                                                                                                                                                  |                                                                                                                         |                                                                                                                                              |                                                                                                                                                                                                                                                                                                                                                                                                                                                                                                                                                                                                                                                                                                                                         |
| see above                                                                                                                                                                                                                                                                                                                                                                                                                                                                                                                                                                                                                                                                                                               | Yale Clinical Virology Lab                                                                                              | Grubaugh Lab - Yale School of Public Health                                                                                                  | Anderson Brito; Chaney Kalinich; Chantal Vogels; Isabel Ott; Joseph Fauver; Kendall Billig; Mallery Breban; Marie L. Landry; Mary Petrone; Nathan Grubaugh; Tobias Koch                                                                                                                                                                                                                                                                                                                                                                                                                                                                                                                                                                 |
| EPI_ISL_7472293, EPI_ISL_7661000, EPI_ISL_7661001, EPI_ISL_7661002                                                                                                                                                                                                                                                                                                                                                                                                                                                                                                                                                                                                                                                      | Yale Pathology Labs                                                                                                     | Yale Pathology Labs                                                                                                                          | Angelique Levi; Brian Daley; Chen Liu; Guangxiao Yang; Heidi Herrick; Jianhui Wang; Jinglan Wang; John Sinar; Katherine Fajardo; Kevin Schofield; Laura Brady; Michael Stankewich; Minghao Zhong; Monica Talmor; Pei Hui; Peter Gershkovich; Richard Bouffard; Stephanie Weirsman; Susan Bell; Sylvia White                                                                                                                                                                                                                                                                                                                                                                                                                             |
| EPI_ISL_6795833, EPI_ISL_6795835, EPI_ISL_6795836, EPI_ISL_6795837, EPI_ISL_6795838, EPI_ISL_6795839, EPI_ISL_6795840, EPI_ISL_6795841, EPI_ISL_6795842, EPI_ISL_6795844, EPI_ISL_6795845, EPI_ISL_6795846, EPI_ISL_6795847, EPI_ISL_6795848, EPI_ISL_6795849, EPI_ISL_6795850, EPI_ISL_6825389, EPI_ISL_6825390, EPI_ISL_6825391, EPI_ISL_6825392, EPI_ISL_6825393, EPI_ISL_6825394, EPI_ISL_7015190, EPI_ISL_7015191, EPI_ISL_7015192, EPI_ISL_7015193, EPI_ISL_7015194, EPI_ISL_7015195, EPI_ISL_7015196, EPI_ISL_7015197, EPI_ISL_7015198, EPI_ISL_7015199, EPI_ISL_7015200, EPI_ISL_7015201, EPI_ISL_7015202, EPI_ISL_7015203, EPI_ISL_7015204, EPI_ISL_7015205, EPI_ISL_7015206, EPI_ISL_7015207, EPI_ISL_7015208 |                                                                                                                         |                                                                                                                                              |                                                                                                                                                                                                                                                                                                                                                                                                                                                                                                                                                                                                                                                                                                                                         |
| see above                                                                                                                                                                                                                                                                                                                                                                                                                                                                                                                                                                                                                                                                                                               | ZARV/NHLS, Department Medical Virology, University of Pretoria                                                          | CERI, Centre for Epidemic Response and Innovation, Stellenbosch University and KRISP, KZN Research Innovation and Sequencing Platform, UKZN. | Adriano Mendes; Amoaka D.; Amy Strydom; Arisha Maharaj; Bestor P. Bhiman; J; Engelbrecht S; Everatt J; Giandhari J; Goedhals D; Hardie D; Hsiao M; Iranzadeh A; Lessells R; Makatini Z; Maoponga T; Mdlalose N; Micheala David; Misana K; Moir M; NGS-SA (Scheepers C; Naidoo Y; Nyaga M) Giandhari J; Oluwakemi M; Pillay S; Preiser W; Ramphal U; Ramphal Y; San JE; Sim Mayaphi and Marietjie Venter; Tegally H; Tshiabula D; Venter M; Wilkinson E; Williamson C; de Oliveira T; von Gottberg A                                                                                                                                                                                                                                     |
| EPI_ISL_7548959, EPI_ISL_7548966, EPI_ISL_7549083                                                                                                                                                                                                                                                                                                                                                                                                                                                                                                                                                                                                                                                                       | ZOTZ KLIMAS MVZ Düsseldorf-Centrum GbR ÜBAG für Labormedizin, Genetik, Zytologie,                                       | Center of Medical Microbiology, Virology, and Hospital Hygiene, University of Duesseldorf                                                    | Alexander Dilthey; Andreas Walker; Daniel Strelow; Jessica Nicolaï; Jörg Timm; Katrin Hoffmann; Klaus Pfeifer; Lisanna Hülse; Malte Kohns Vasconcelos; Maximilian Damagnez; Nadine Lübke; Patrick Finzer; Rainer Zotz; Tobias Wieneemann; Torsten Houwaart                                                                                                                                                                                                                                                                                                                                                                                                                                                                              |

|                                     |                                                            |                                                                 |                                                                                                                                                                                                                                                                                                                                                                                                                                                                                                                                                        |
|-------------------------------------|------------------------------------------------------------|-----------------------------------------------------------------|--------------------------------------------------------------------------------------------------------------------------------------------------------------------------------------------------------------------------------------------------------------------------------------------------------------------------------------------------------------------------------------------------------------------------------------------------------------------------------------------------------------------------------------------------------|
| EPI_ISL_7544865,<br>EPI_ISL_7606038 | Pathologie<br>Zentrallabor Zürich                          | Institute of Medical Virology, University<br>of Zurich          | Alexandra Trkola; Annette Audigé; Catharine Aquino; Cyril Shah; Daniel Ehram; Gabriela Ziltener; Guido Bloemberg; Hubert Rehrauer; Isabel Stürmer; Joel Wirz; Jon Huder; Jürg Böni; Kevin Steiner; Maria Grünberg; Maryam Zaheri; Michael Huber; Riccarda Capaul; Stefan Schmutz; Verena Kufner; Weihong Qi                                                                                                                                                                                                                                            |
| EPI_ISL_7423603                     | amedes MVZ für<br>Laboratoriumsdiagnostik Raubling<br>GmbH | Robert Koch Institute                                           |                                                                                                                                                                                                                                                                                                                                                                                                                                                                                                                                                        |
| EPI_ISL_7368223,<br>EPI_ISL_7594806 | labor team w AG                                            | Department of Biosystems Science and<br>Engineering, ETH Zürich | Andrea Patrignani; Andreas Lindauer; Andreia Cabral de Gouvea; Catharine Aquino; Catharine Aquino Fournier; Chaoran Chen; Christian Urban; Daniel Ehram; David Dreifuss; Doris Popovic; Franziska Singer; Griffin White; Hai Bui; Isabel Stürmer; Ivan Topolsky; Jay Tracy; Kim Philipp Jablonski; Lara Fuhrmann; Laura Neff; Lennart Opitz; Louis du Plessis; Maria Domenica Moccia; Matteo Carrara; Monika Bucher; Niko Beerwinkel; Pelin Icer; Ralph Schlapbach; Rebekka Pohl; Sarah Nadeau; Shuqing Yu; Simon Grüter; Tanja Stadler; Timothy Sykes |
